# Supplementary material for: Production of Ellagitannin Hexahydroxydiphenoyl Ester by Spontaneous Reduction of Dehydrohexa-hydroxydiphenoyl Ester
Source: PubMed Central journal article supplement (PMC7179100; doi:10.3390/molecules25051051), 2020-02-26
Supplement: molecules-25-01051-s001.pdf [file molecules-25-01051-s001.pdf]

# Supplementary Materials

## Production of Ellagitannin Hexahydroxydiphenoyl Ester by Spontaneous Reduction of Dehydrohexahydroxydiphenoyl Ester

Manami Era, Yosuke Matsuo, Yoshinori Saito, and Takashi Tanaka\*

### Table of Contents

|             |                                                                                                                                     |     |
|-------------|-------------------------------------------------------------------------------------------------------------------------------------|-----|
| Figure S1.  | The leaves of <i>Triadica sebifera</i> (syn. <i>Sapium sebiferum</i> ) used for the HPLC analysis.                                  | S2  |
| Figure S2.  | HPLC profiles of 60% CH <sub>3</sub> CN extracts of <i>Elaeocarpus sylvestris</i> var. <i>ellipticus</i> fresh leaves               | S2  |
| Table S1    | <sup>1</sup> H NMR data for phenazine derivatives.                                                                                  | S3  |
| Figure S3.  | HPLC profiles of aqueous solution of amariin ( <b>1</b> ) in pH 6 citrate-phosphate buffer at r.t.                                  | S3  |
| Figure S4.  | HPLC profiles of isoamariin ( <b>3</b> ) in pH 6 citrate-phosphate buffer at r.t.                                                   | S4  |
| Figure S5.  | Structures of minor products produced by degradation of <b>1</b> .                                                                  | S4  |
| Figure S6.  | HMBC correlations and ECD spectra of 1-O-galloyl-3,6-(S)-HHDP-β-D-glucose.                                                          | S4  |
| Figure S7.  | HPLC profile (A) and UV spectrum (B) of oligomeric polyphenol fraction obtained from <b>2</b> .                                     | S5  |
| Figure S8.  | <sup>13</sup> C NMR spectrum of oligomeric polyphenol fraction measured in acetone- <i>d</i> <sub>6</sub> .                         | S5  |
| Figure S9.  | HPLC profiles of acid hydrolysis of 2, 1-O-galloyl-2,4-(R)-DHHDP-β-D-glucopyranose, and 1-O-galloyl-3,6-(R)-HHDP-β-D-glucopyranose. | S6  |
| Figure S10. | <sup>1</sup> H NMR spectrum of amariin ( <b>1</b> ) (500 MHz, in acetone- <i>d</i> <sub>6</sub> )                                   | S7  |
| Figure S11. | <sup>13</sup> C NMR spectrum of amariin ( <b>1</b> ) (125 MHz, in acetone- <i>d</i> <sub>6</sub> )                                  | S7  |
| Figure S12. | <sup>1</sup> H NMR spectrum of bisacetonyl amariin ( <b>1a</b> ) (500 MHz, in acetone- <i>d</i> <sub>6</sub> )                      | S8  |
| Figure S13. | <sup>13</sup> C NMR spectrum of bisacetonyl amariin ( <b>1a</b> ) (125 MHz, in acetone- <i>d</i> <sub>6</sub> )                     | S8  |
| Figure S14. | <sup>1</sup> H- <sup>1</sup> H COSY spectrum of bisacetonyl amariin ( <b>1a</b> ) (in acetone- <i>d</i> <sub>6</sub> )              | S9  |
| Figure S15. | NOESY spectrum of bisacetonyl amariin ( <b>1a</b> ) (in acetone- <i>d</i> <sub>6</sub> )                                            | S9  |
| Figure S16. | HSQC spectrum of bisacetonyl amariin ( <b>1a</b> ) (in acetone- <i>d</i> <sub>6</sub> )                                             | S10 |
| Figure S17. | HMBC spectrum of bisacetonyl amariin ( <b>1a</b> ) (in acetone- <i>d</i> <sub>6</sub> )                                             | S10 |
| Figure S18. | <sup>1</sup> H NMR spectrum and selected HMBC correlations for phenazine derivative of amariin.                                     | S11 |
| Figure S19. | <sup>1</sup> H NMR spectrum of isoamariin ( <b>3</b> ) (500 MHz, in acetone- <i>d</i> <sub>6</sub> ).                               | S11 |
| Figure S20. | <sup>13</sup> C NMR spectrum of isoamariin ( <b>3</b> ) (125 MHz, in acetone- <i>d</i> <sub>6</sub> ).                              | S12 |
| Figure S21. | <sup>1</sup> H- <sup>1</sup> H COSY spectrum of isoamariin ( <b>3</b> ) (500 MHz, in acetone- <i>d</i> <sub>6</sub> ).              | S12 |
| Figure S22. | NOESY spectrum of isoamariin ( <b>3</b> ) (500 MHz, in acetone- <i>d</i> <sub>6</sub> ).                                            | S13 |
| Figure S23. | HSQC spectrum of isoamariin ( <b>3</b> ) (in acetone- <i>d</i> <sub>6</sub> ).                                                      | S13 |
| Figure S24. | HMBC spectrum of isoamariin ( <b>3</b> ) (in acetone- <i>d</i> <sub>6</sub> ).                                                      | S14 |
| Figure S25. | <sup>1</sup> H NMR spectrum of isoamariin phenazine derivative ( <b>3a</b> ) (400 MHz, in acetone- <i>d</i> <sub>6</sub> ).         | S14 |
| Figure S26. | <sup>13</sup> C NMR spectrum of isoamariin phenazine derivative ( <b>3a</b> ) (100 MHz, in acetone- <i>d</i> <sub>6</sub> ).        | S15 |
| Figure S27. | <sup>1</sup> H NMR spectrum of <b>9</b> in acetone- <i>d</i> <sub>6</sub> (500 MHz)                                                 | S15 |
| Figure S28. | <sup>13</sup> C NMR spectrum of <b>9</b> in acetone- <i>d</i> <sub>6</sub> (125 MHz)                                                | S16 |
| Figure S29. | <sup>1</sup> H- <sup>1</sup> H COSY spectrum of <b>9</b> in acetone- <i>d</i> <sub>6</sub> (500 MHz)                                | S16 |
| Figure S30. | HSQC spectrum of <b>9</b> in acetone- <i>d</i> <sub>6</sub>                                                                         | S17 |
| Figure S31. | HMBC spectrum of <b>9</b> in acetone- <i>d</i> <sub>6</sub>                                                                         | S17 |
|             | Computational Methods.                                                                                                              | S18 |

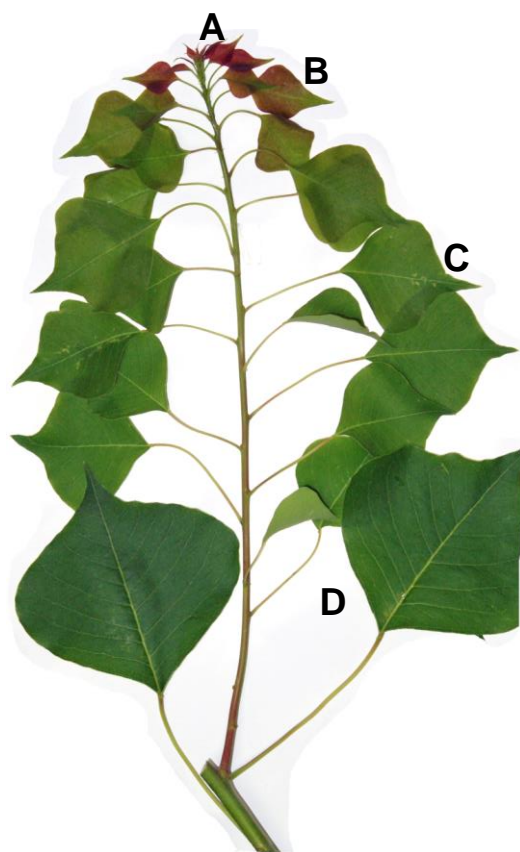

**Figure S1.** The leaves of *Triadica sebifera* (syn. *Sapium sebiferum*) used for the HPLC analysis.

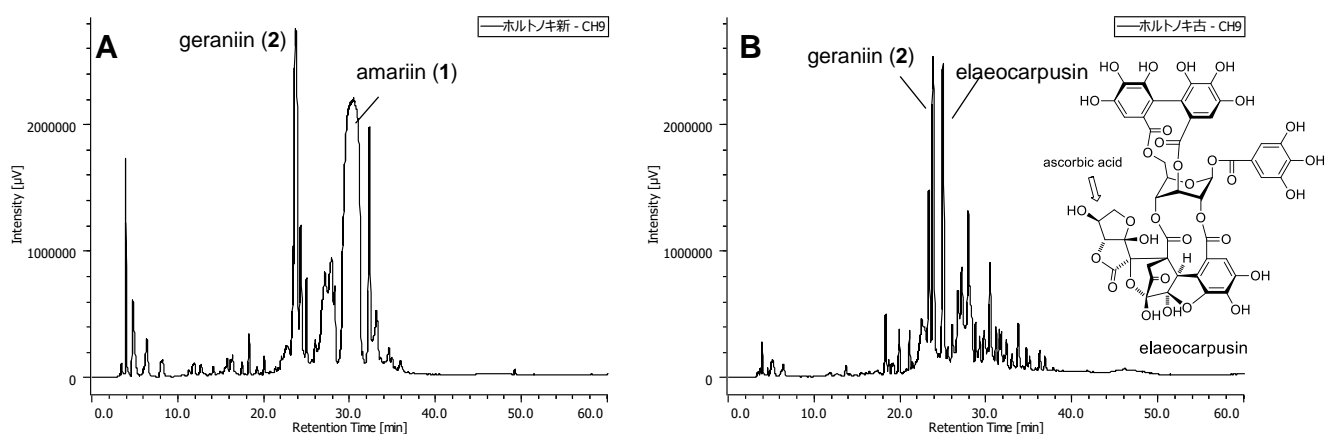

**Figure S2.** HPLC profiles of 60% CH<sub>3</sub>CN extracts of *Eleoarpus sylvestris* var. *ellipticus* fresh leaves collected in July (0.5g/7.5 mL, r.t.). **A:** young soft leaf at the top of twig, **B:** matured hard leaf at lower part of the same twig. Elaeocarpusin is an ascorbic acid adduct of geraniin. This compound easily decompose to give geraniin and ascorbic acid.<sup>[8]</sup>

**Table S1.**  $^1\text{H}$  NMR data for phenazine derivatives in acetone- $d_6$  ( $\delta$  in ppm,  $J$  in Hz).

|                       | isoamariin-phen <sup>a,c</sup>   | didehydrogeraniin-phen <sup>b,c</sup> | amariin-phen <sup>a,c</sup>      |
|-----------------------|----------------------------------|---------------------------------------|----------------------------------|
| Position              | $\delta_{\text{H}}$ ( $J$ in Hz) | $\delta_{\text{H}}$ ( $J$ in Hz)      | $\delta_{\text{H}}$ ( $J$ in Hz) |
| 1                     | 6.22 d (5.7)                     | 6.29 d (5)                            | 6.22 d (5.5)                     |
| 2                     | <b>5.71 d (5.7)</b>              | <b>5.90 d (5)</b>                     | <b>5.85 dd (1.0, 5.5)</b>        |
| 3                     | 5.48 d (4.1)                     | 5.44 d (1)                            | 5.39 d (3.9)                     |
| 4                     | <b>5.63 dd (0.7, 4.1)</b>        | <b>5.83 d (4)</b>                     | <b>5.79 br. d (3.9)</b>          |
| 5                     | 5.11 dd (5.1, 8.5)               | 4.80-5.16 m                           | 4.94-5.04 m                      |
| 6a                    | 4.84 dd (8.5, 11.6)              |                                       |                                  |
| 6b                    | 4.12 t (5.1, 11.6)               | 4.17 d (9)                            | 4.11 dd (3.3, 11.8)              |
| aromatic <sup>d</sup> | 8.27, 7.86, 7.46, 7.16           | 8.37, 8.29, 7.57, 7.05                | 8.31, 8.23, 7.51, 7.02           |

<sup>a</sup> 400 MHz, <sup>b</sup> ref 6 (measured in 200 MHz), <sup>c</sup> Phenazine derivatives were represented by amariin-phen, isoamariin-phen, and didehydrogeraniin-phen, <sup>d</sup> All aromatic signals are singlet.

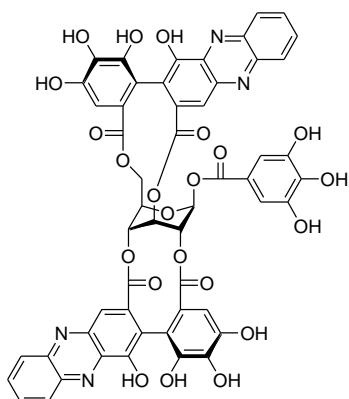

amariin phenazine derivative (**1b**)  
(didehydrogeraniin phenazine derivative)

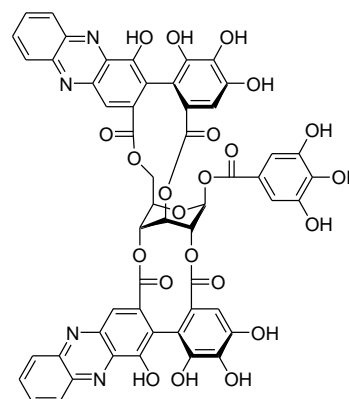

isoamariin phenazine derivative (**3a**)

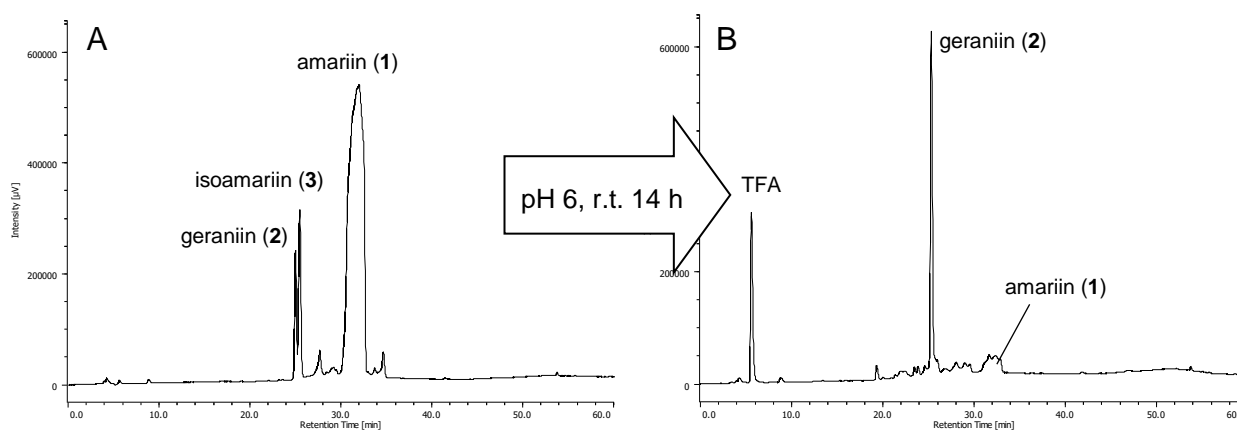

**Figure S3.** HPLC profiles of aqueous solution of amariin (**1**) in pH 6 citrate-phosphate buffer at r.t. **A:** 0 h, **B:** after 14 h. TFA was added to acidify the reaction mixture.

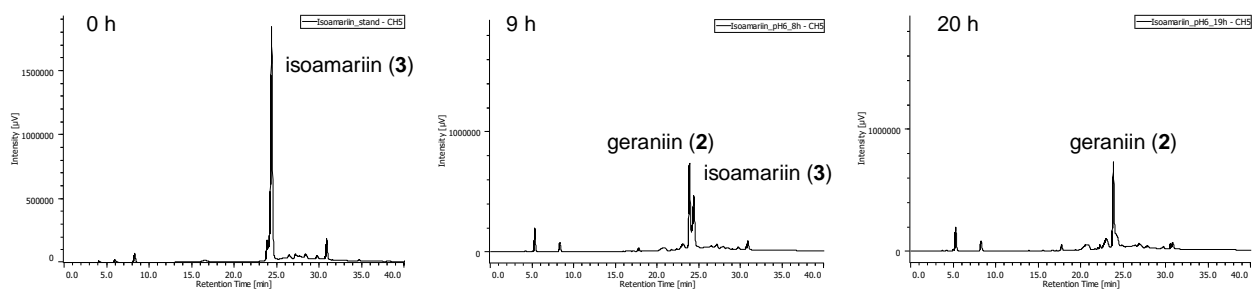

**Figure S4.** HPLC profiles of isoamariin (**3**) in pH 6 citrate-phosphate buffer at r.t.

Isoamariin (**3**) (5 mg) was dissolved in pH 6 citrate-phosphate buffer (0.05M, 1.0 mL) and kept at r.t. and analyzed by HPLC

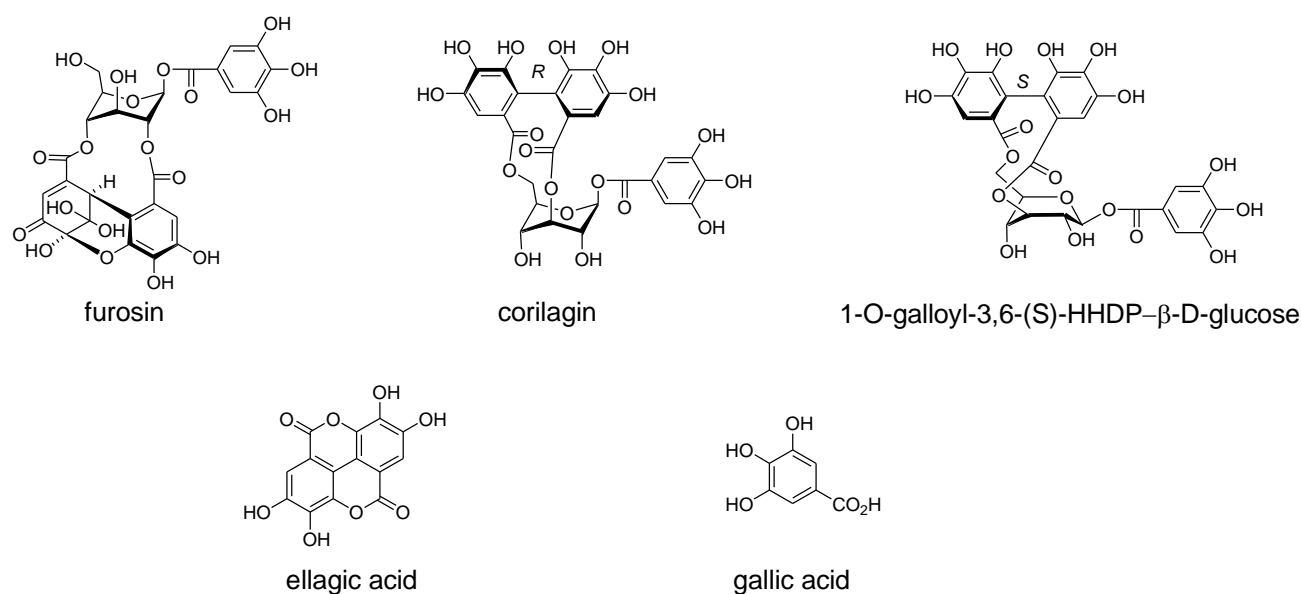

**Figure S5.** Structures of minor products produced by degradation of **1**.

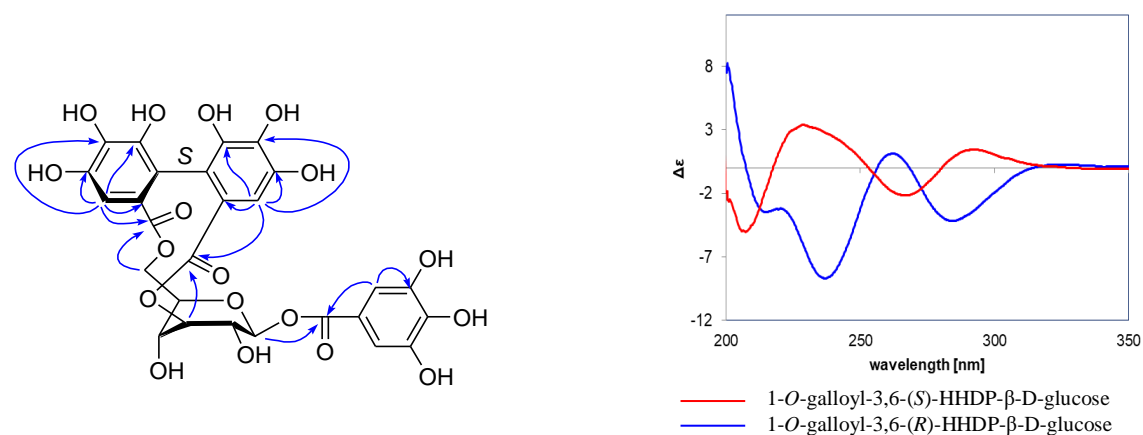

**Figure S6.** HMBC correlations and ECD spectra of 1-O-galloyl-3,6-(S)-HHDP-β-D-glucose.

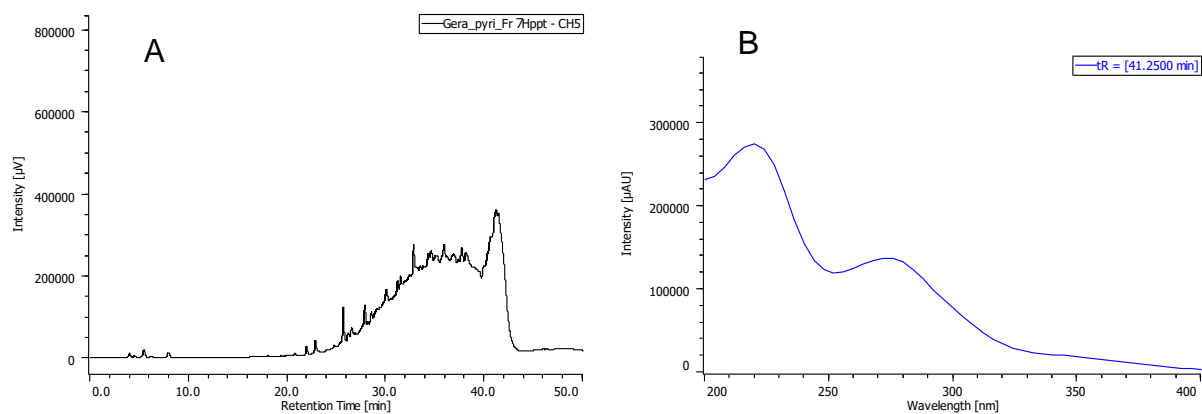

**Figure S7.** HPLC profile (A) and UV spectrum (B) of oligomeric polyphenol fraction obtained from **2**.

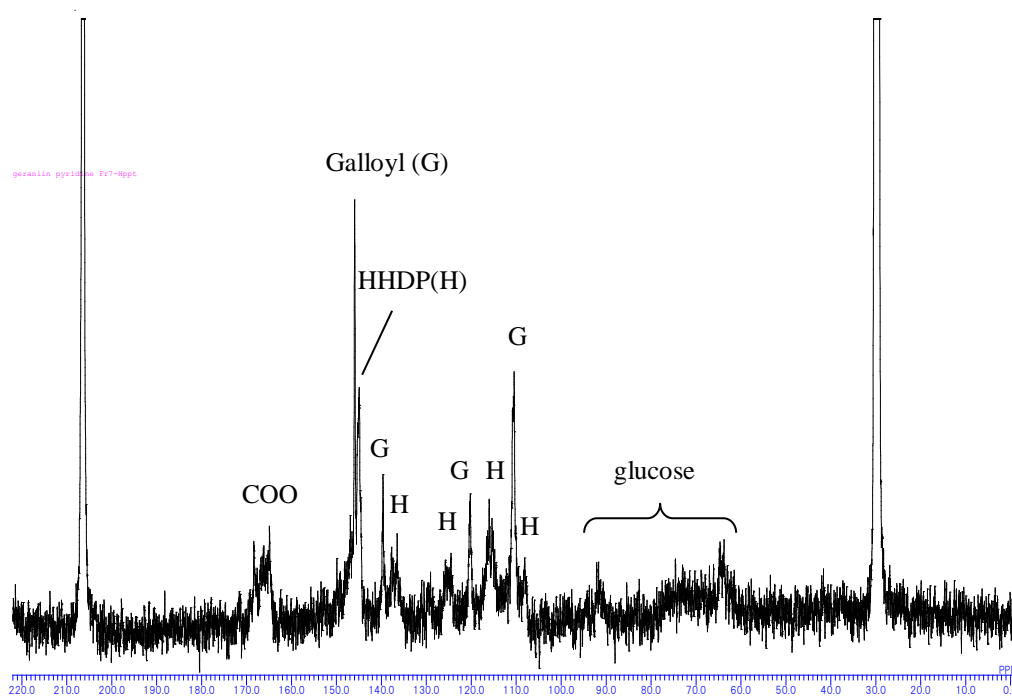

**Figure S8.**  $^{13}\text{C}$  NMR spectrum of oligomeric polyphenol fraction measured in acetone- $d_6$  at 100 MHz.

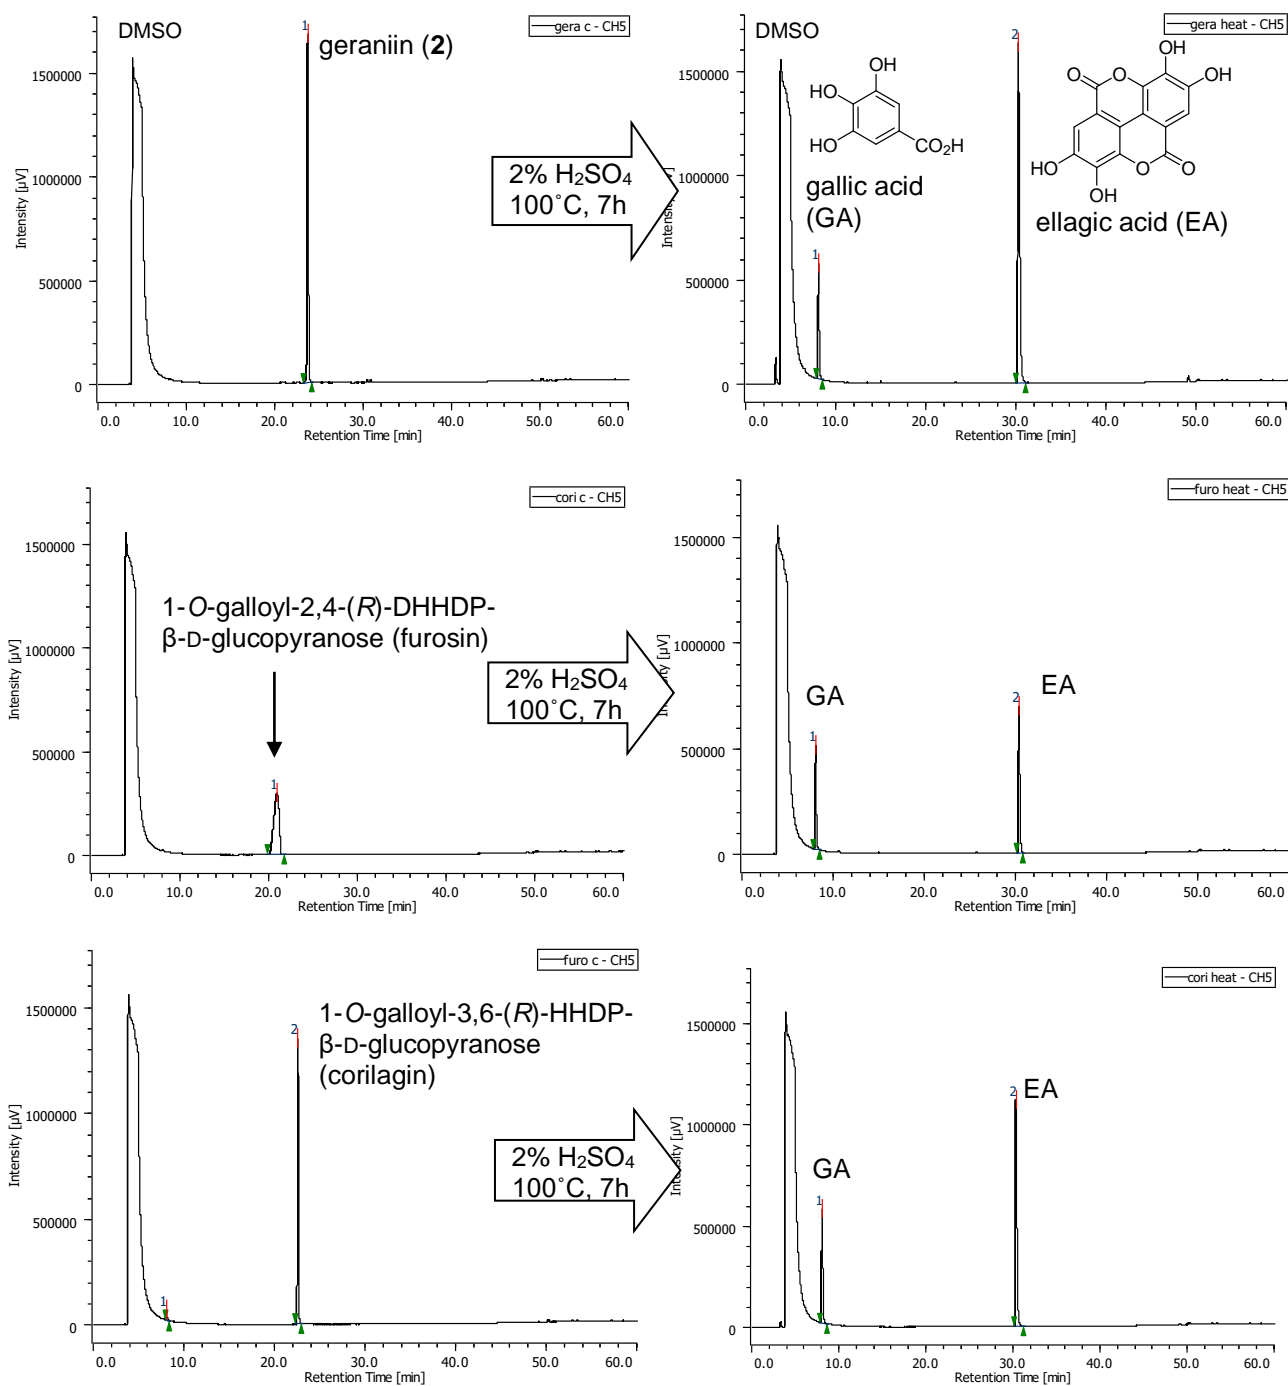

**Figure S9.** HPLC profiles of acid hydrolysis of **2**, 1-*O*-galloyl-2,4-(*R*)-DHHDP-β-D-glucopyranose, and 1-*O*-galloyl-3,6-(*R*)-HHDP-β-D-glucopyranose.

NO.1

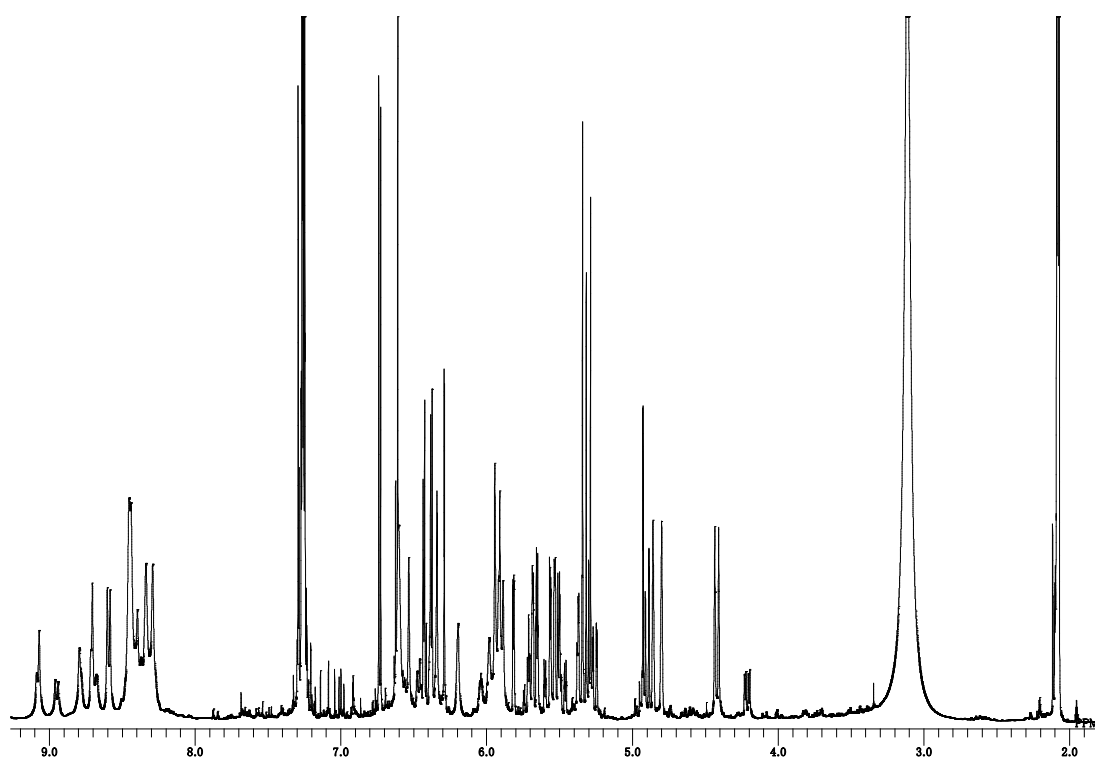

**Figure S10.**  $^1\text{H}$  NMR spectrum of amariin (**1**) (500 MHz, in acetone- $d_6$ )

NO.1

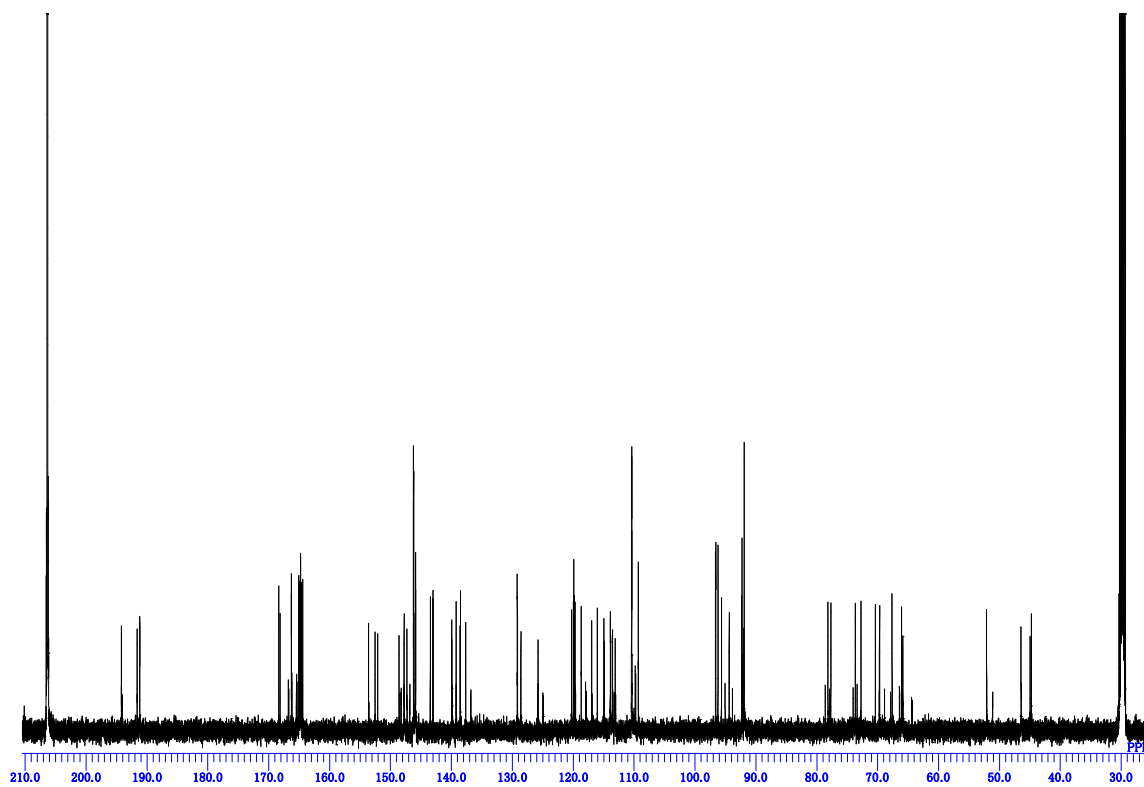

**Figure S11.**  $^{13}\text{C}$  NMR spectrum of amariin (**1**) (125 MHz, in acetone- $d_6$ )





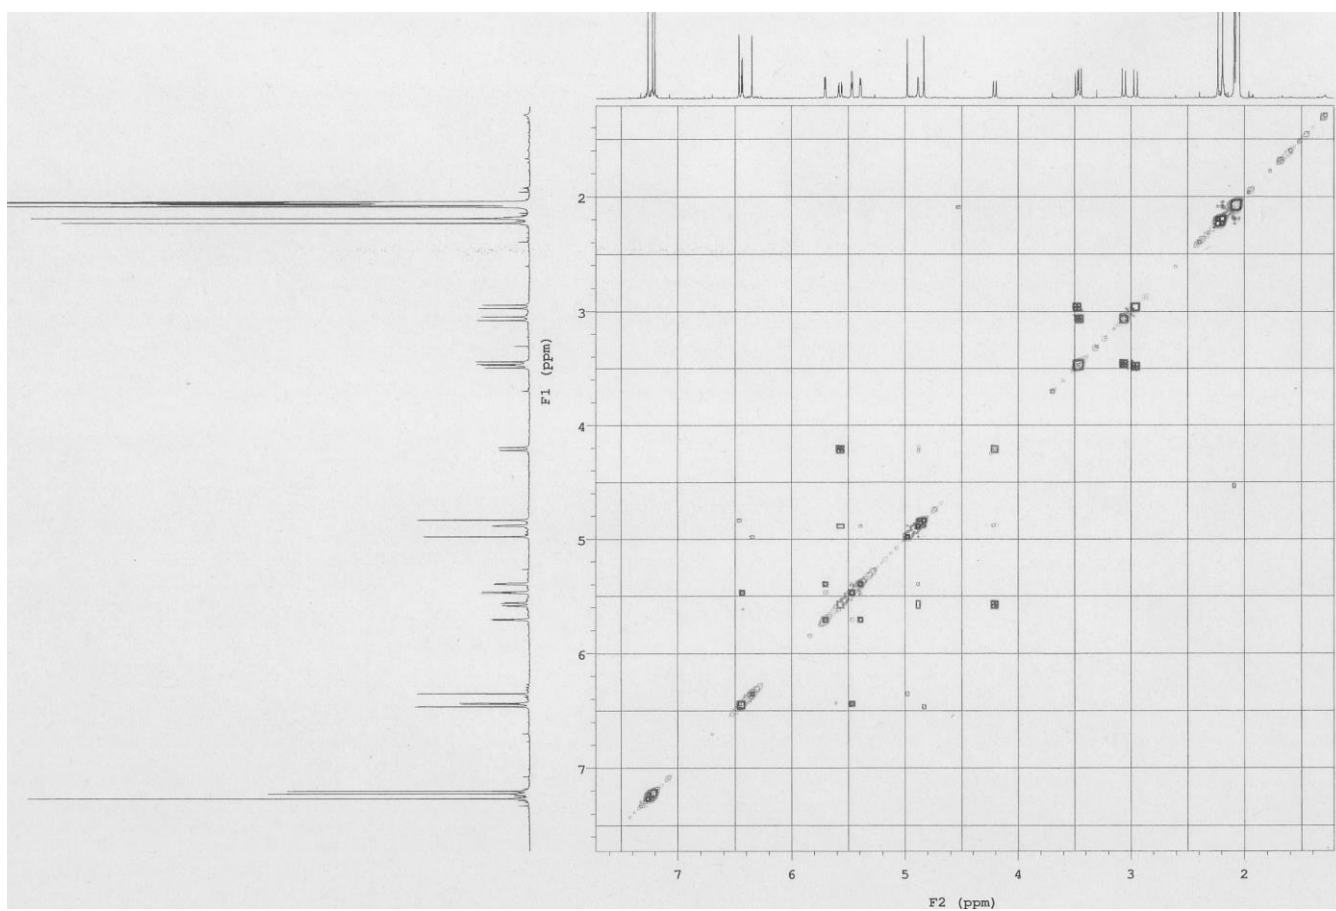

**Figure S14.**  $^1\text{H}$ - $^1\text{H}$  COSY spectrum of bisacetyl amariin (**1a**) (in acetone- $d_6$ )

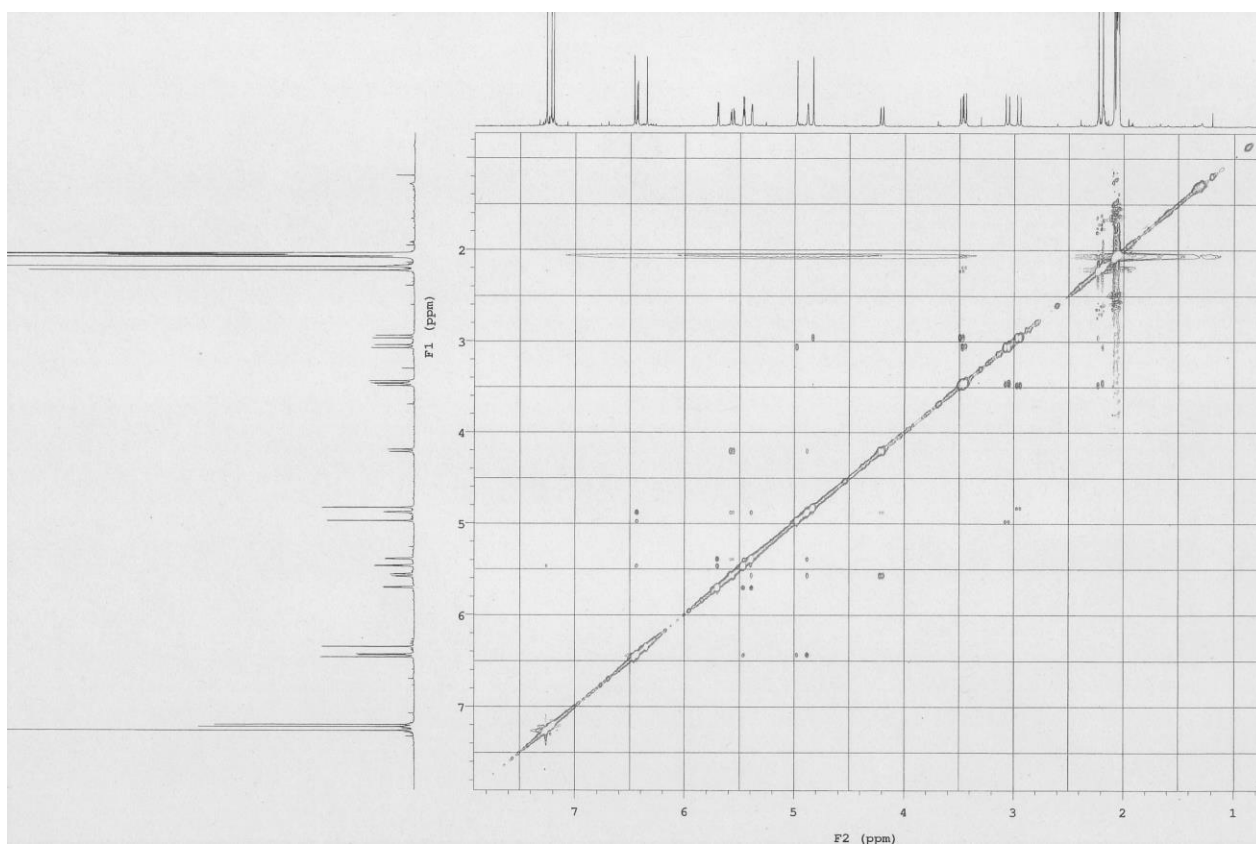

**Figure S15.** NOESY spectrum of bisacetyl amariin (**1a**) (in acetone- $d_6$ )

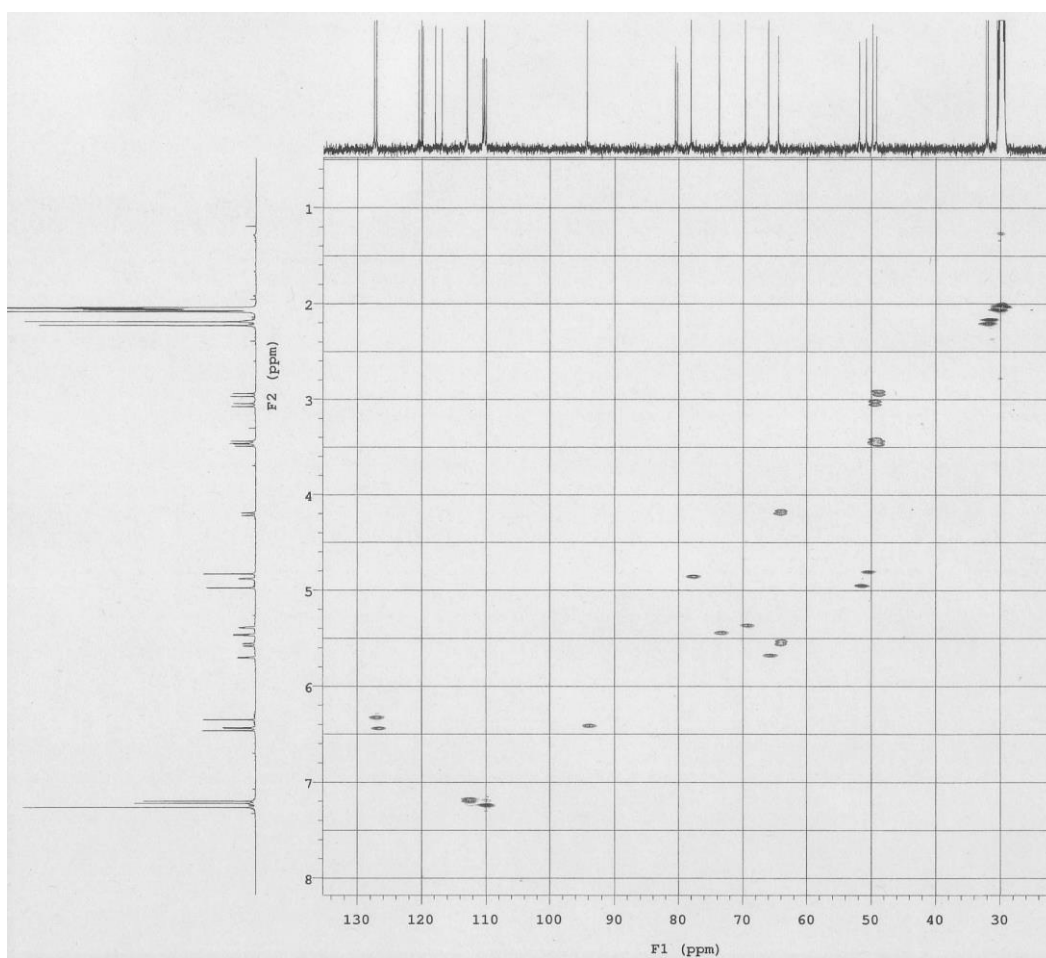

Figure S16. HSQC spectrum of bisacetyl amariin (**1a**) (in acetone- $d_6$ )

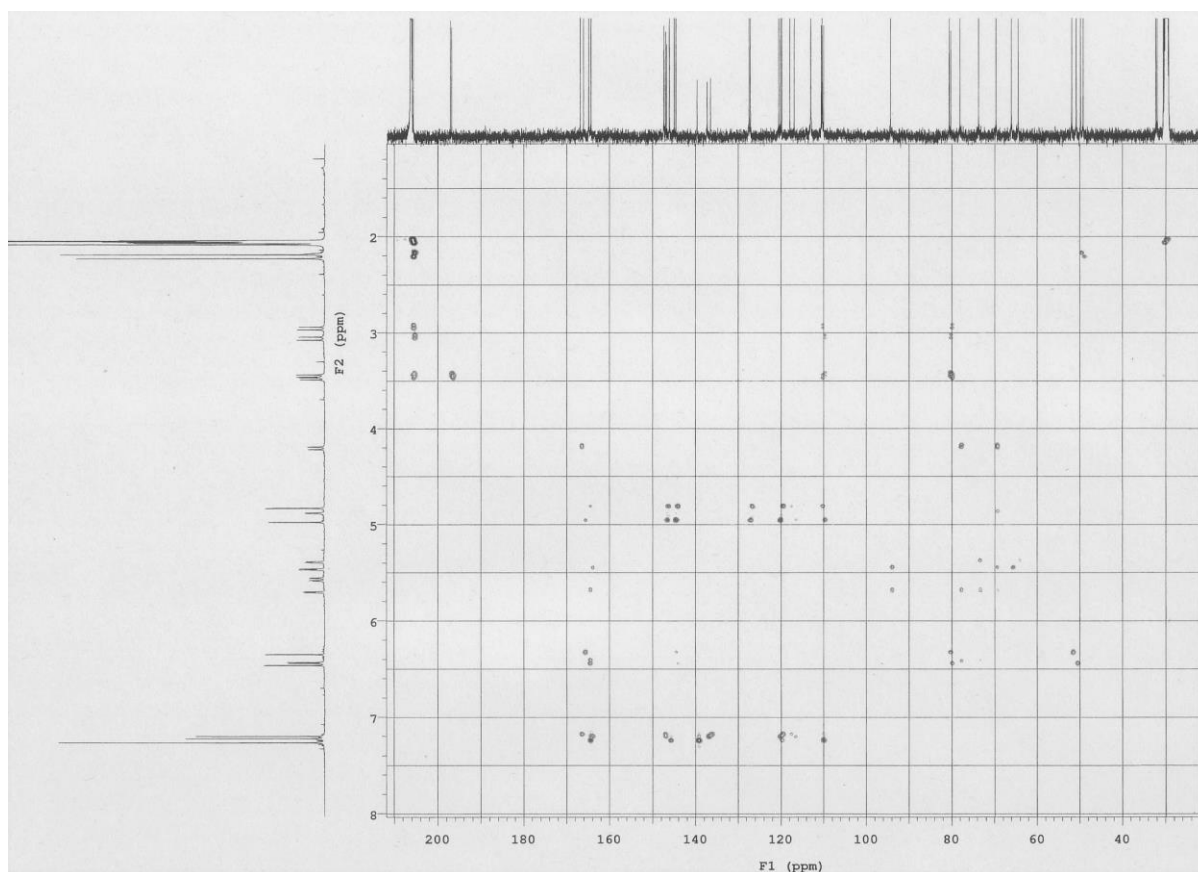

Figure S17. HMBC spectrum of bisacetyl amariin (**1a**) (in acetone- $d_6$ )

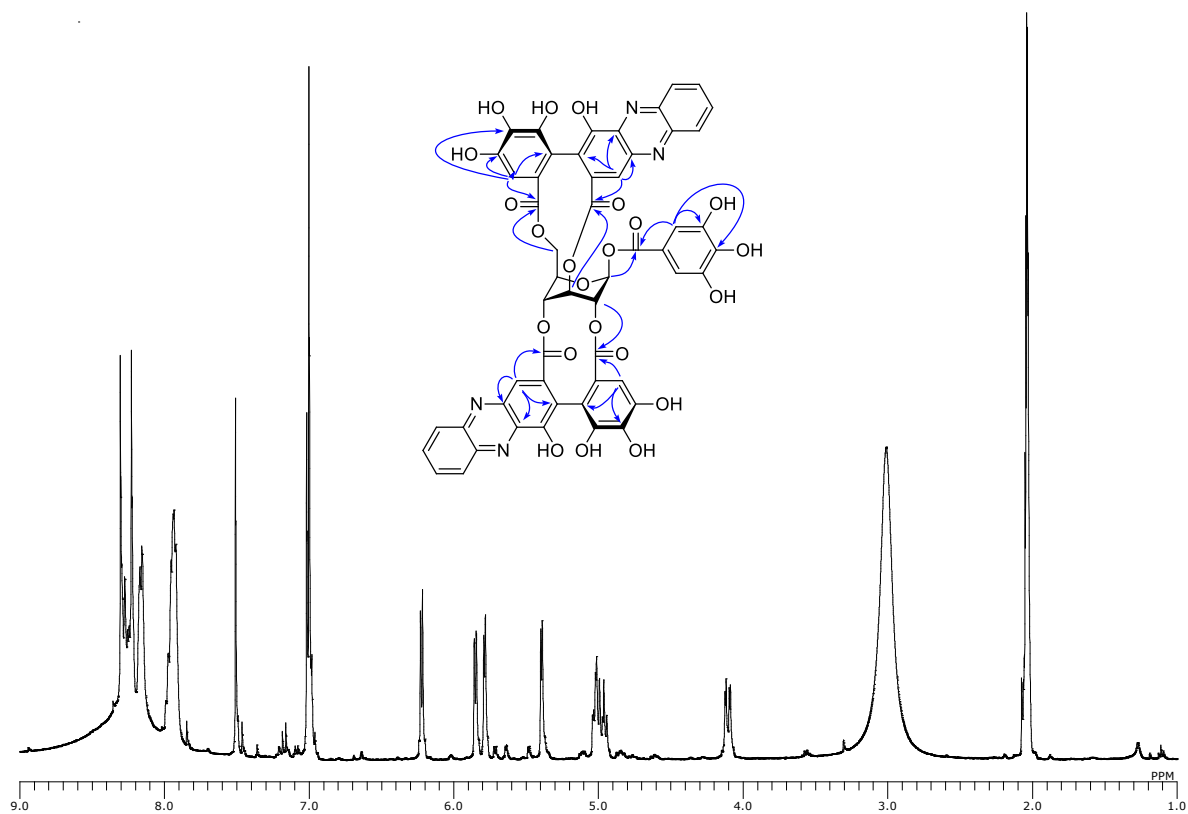

**Figure S18.**  $^1\text{H}$  NMR spectrum and selected HMBC correlations for phenazine derivative of amariin.

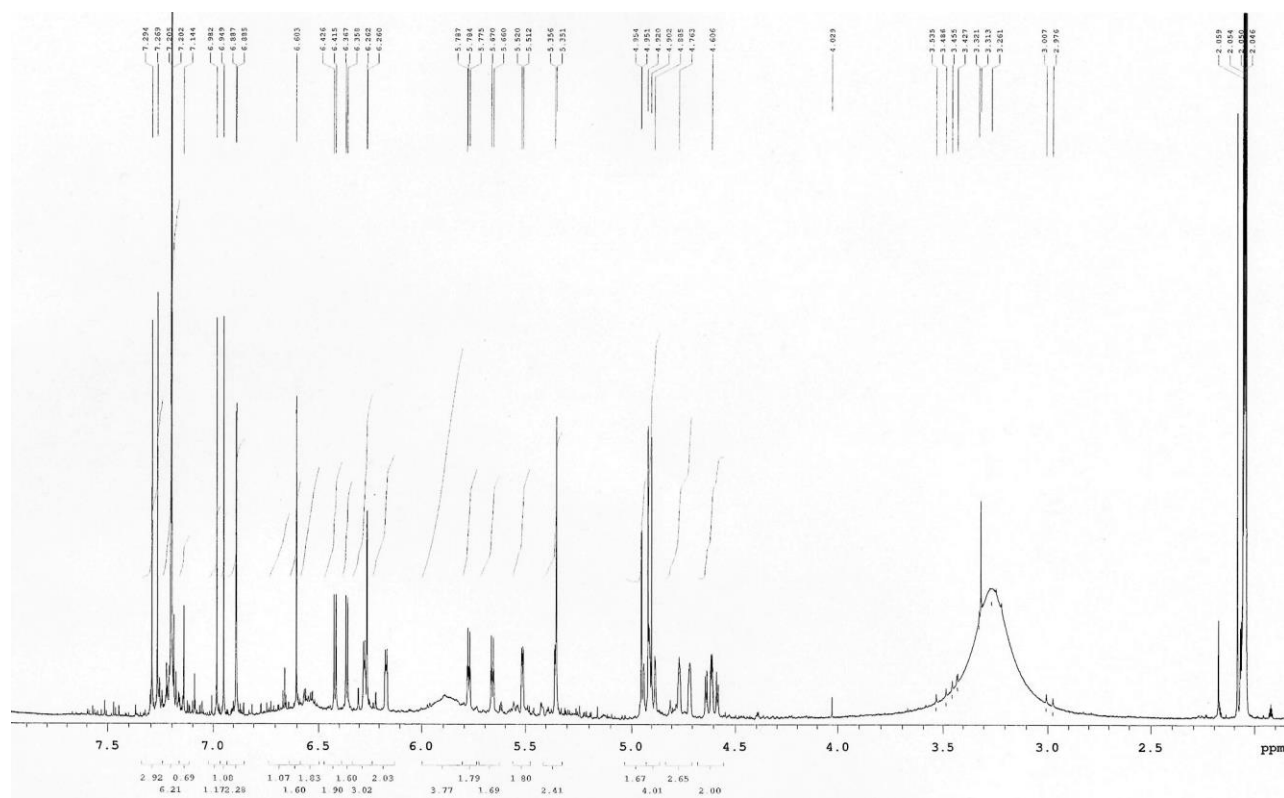

**Figure S19.**  $^1\text{H}$  NMR spectrum of isoamariin (3) (500 MHz, in acetone- $d_6$ ).

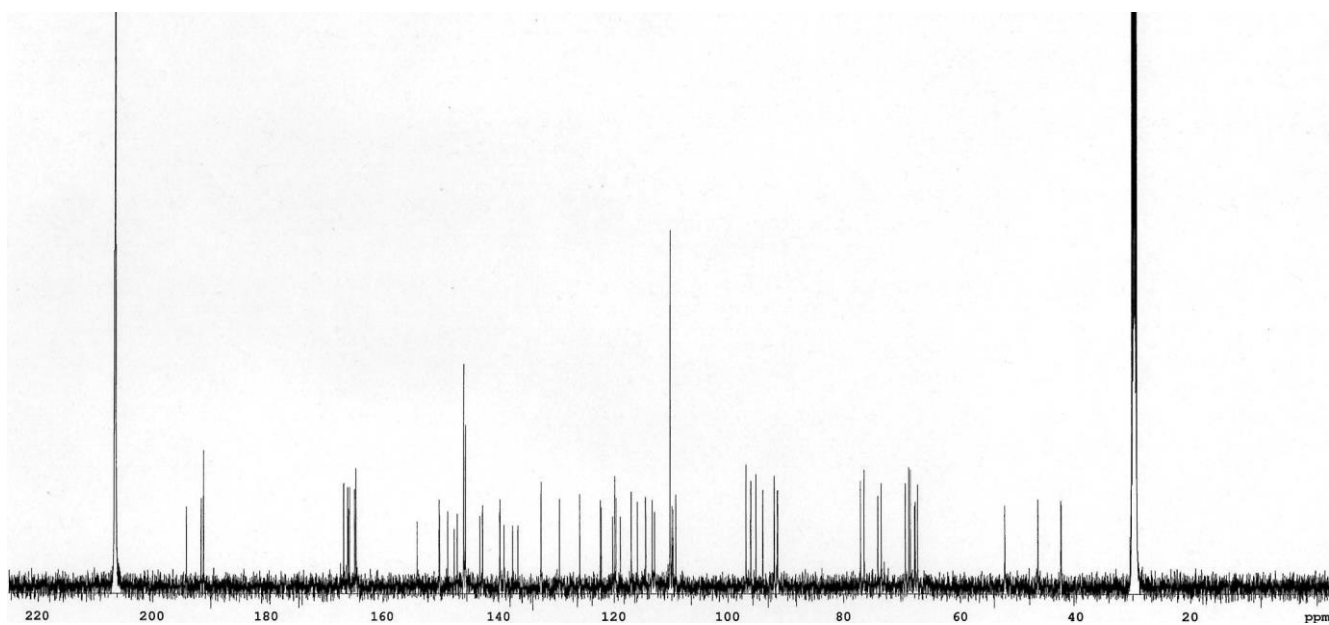

Figure S20.  $^{13}\text{C}$  NMR spectrum of isoamariin (3) (125 MHz, in acetone- $d_6$ ).

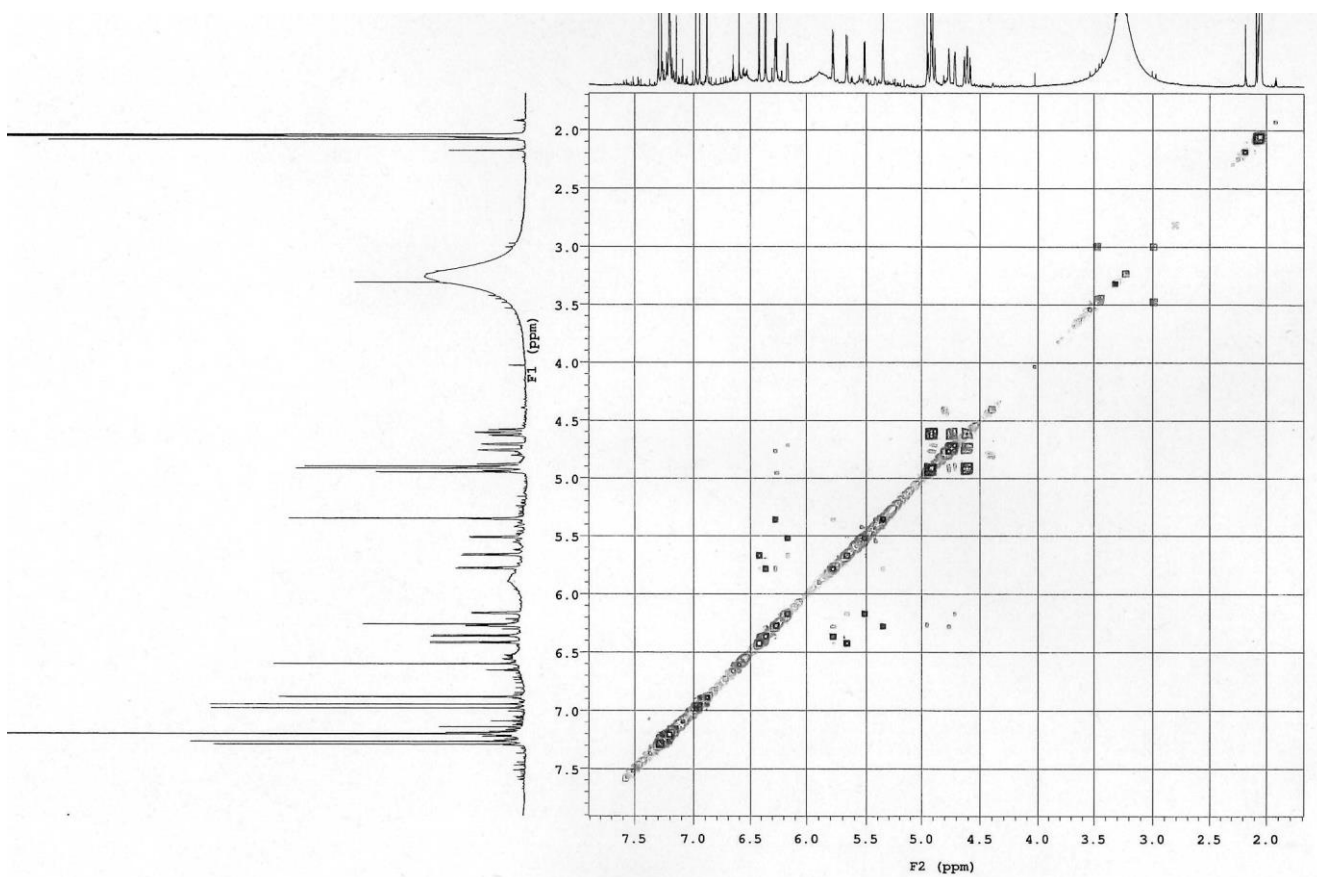

Figure S21.  $^1\text{H}$ - $^1\text{H}$  COSY spectrum of isoamariin (3) (500 MHz, in acetone- $d_6$ ).

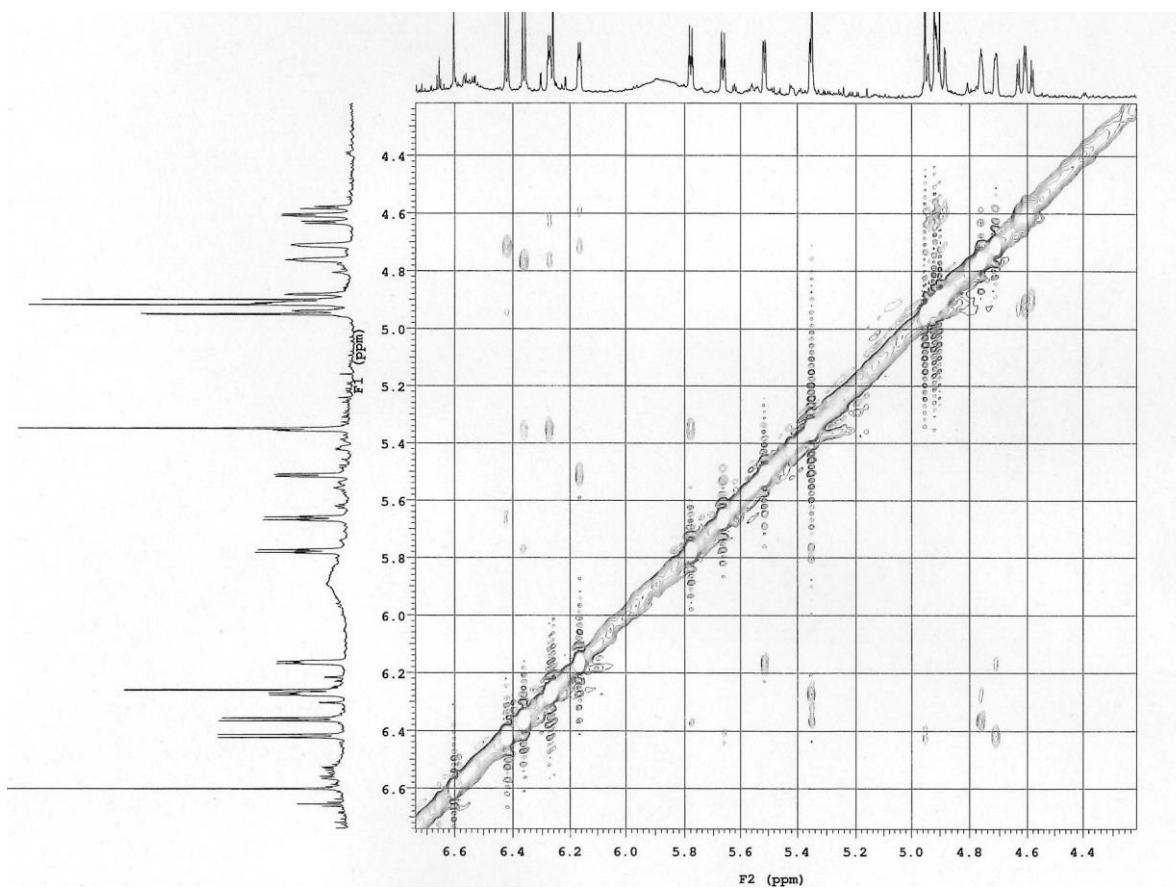

**Figure S22.** NOESY spectrum of isoamariin (**3**) (500 MHz, in acetone-*d*<sub>6</sub>).

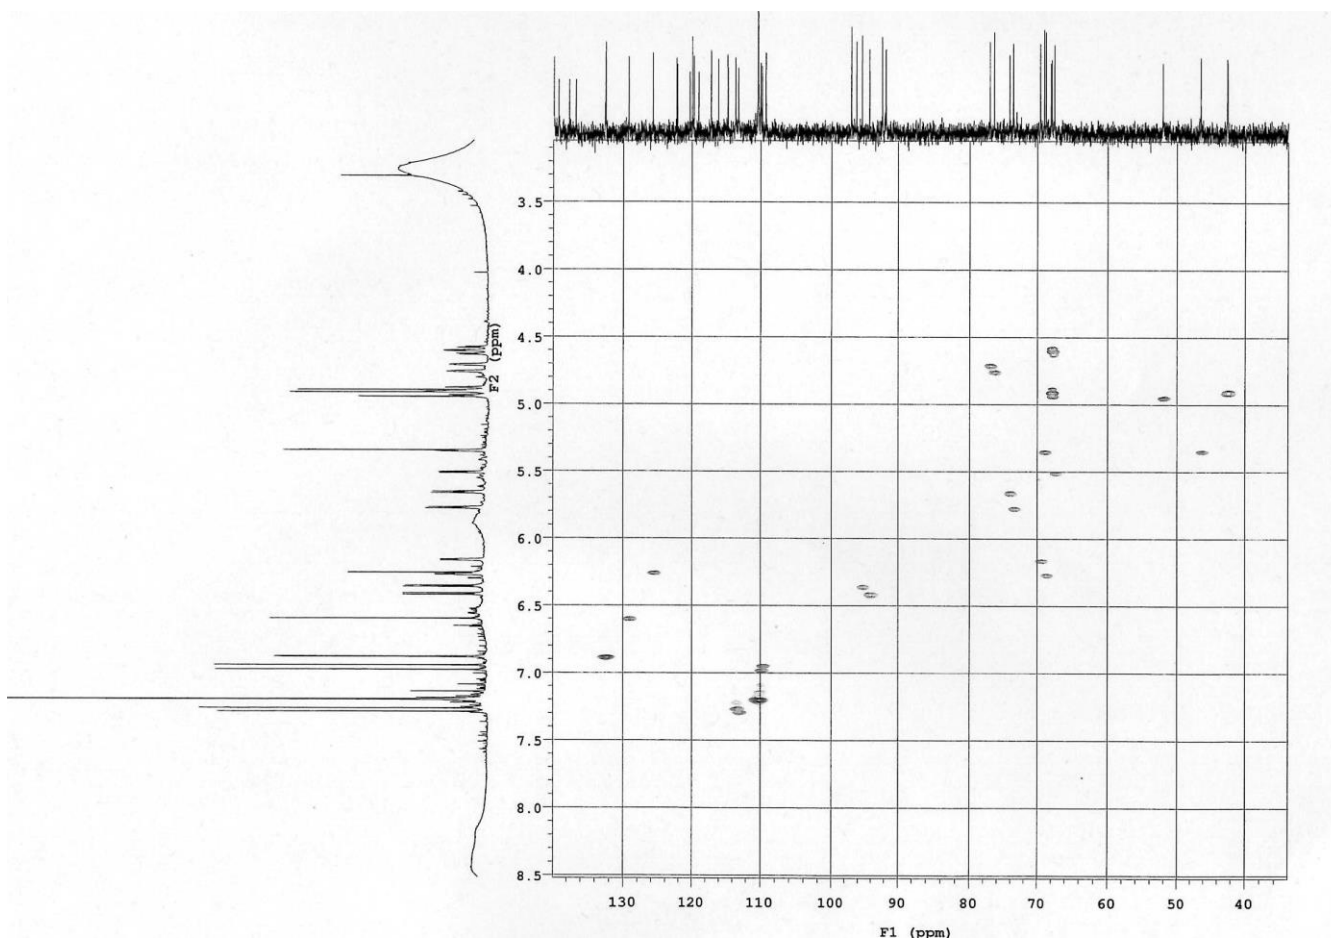

**Figure S23.** HSQC spectrum of isoamariin (**3**) (in acetone-*d*<sub>6</sub>).

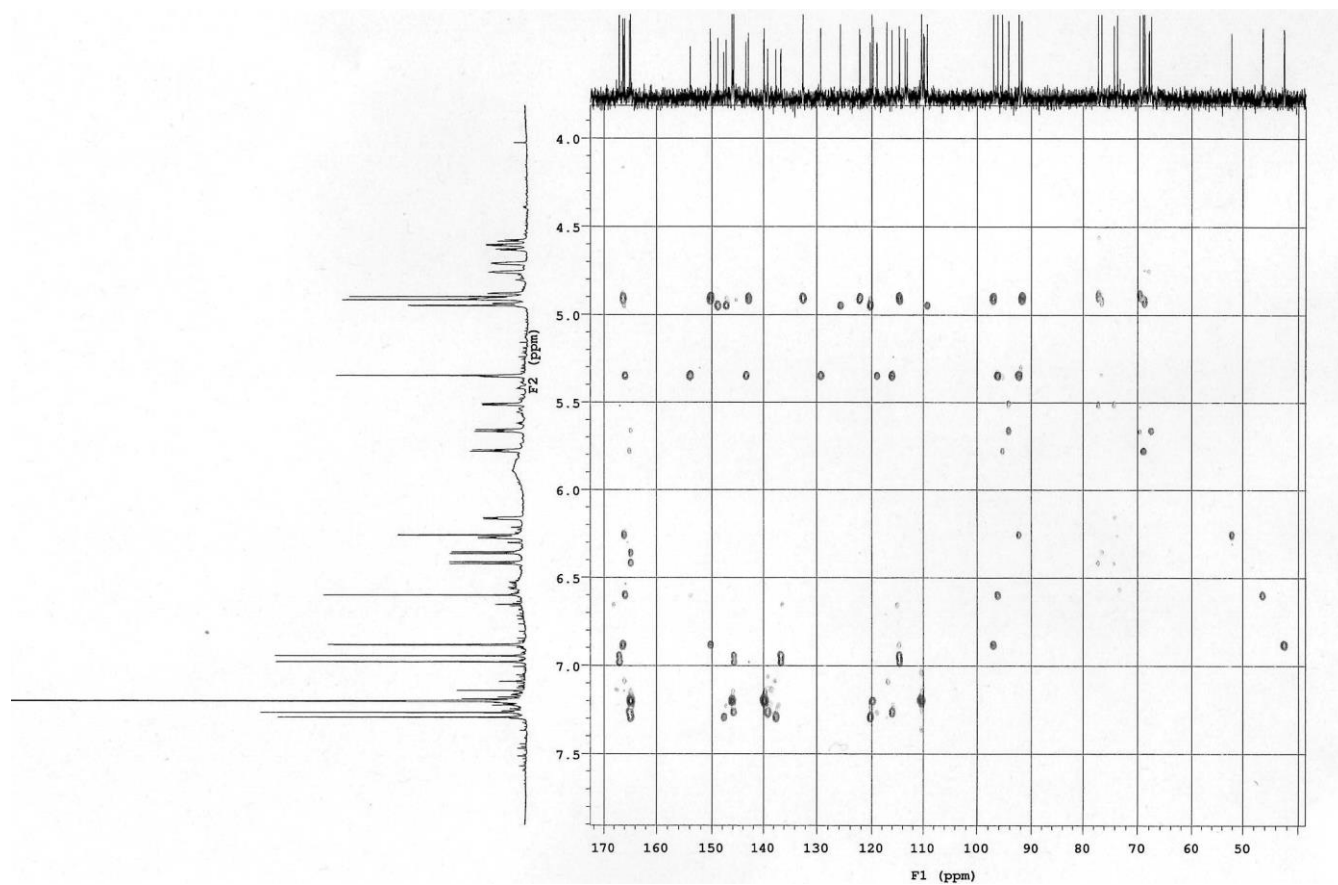

**Figure S24.** HMBC spectrum of isoamariin (**3**) (in acetone- $d_6$ ).

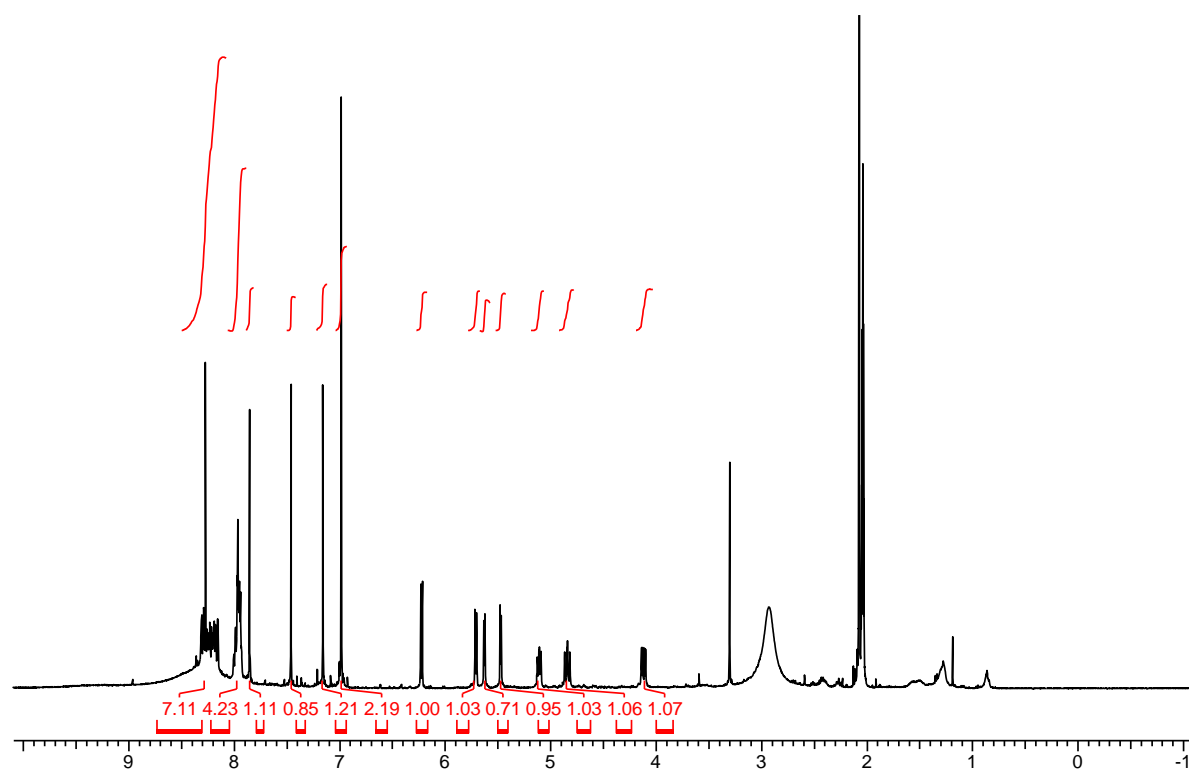

**Figure S25.**  $^1\text{H}$  NMR spectrum of isoamariin phenazine derivative (**3a**) (400 MHz, in acetone- $d_6$ ).

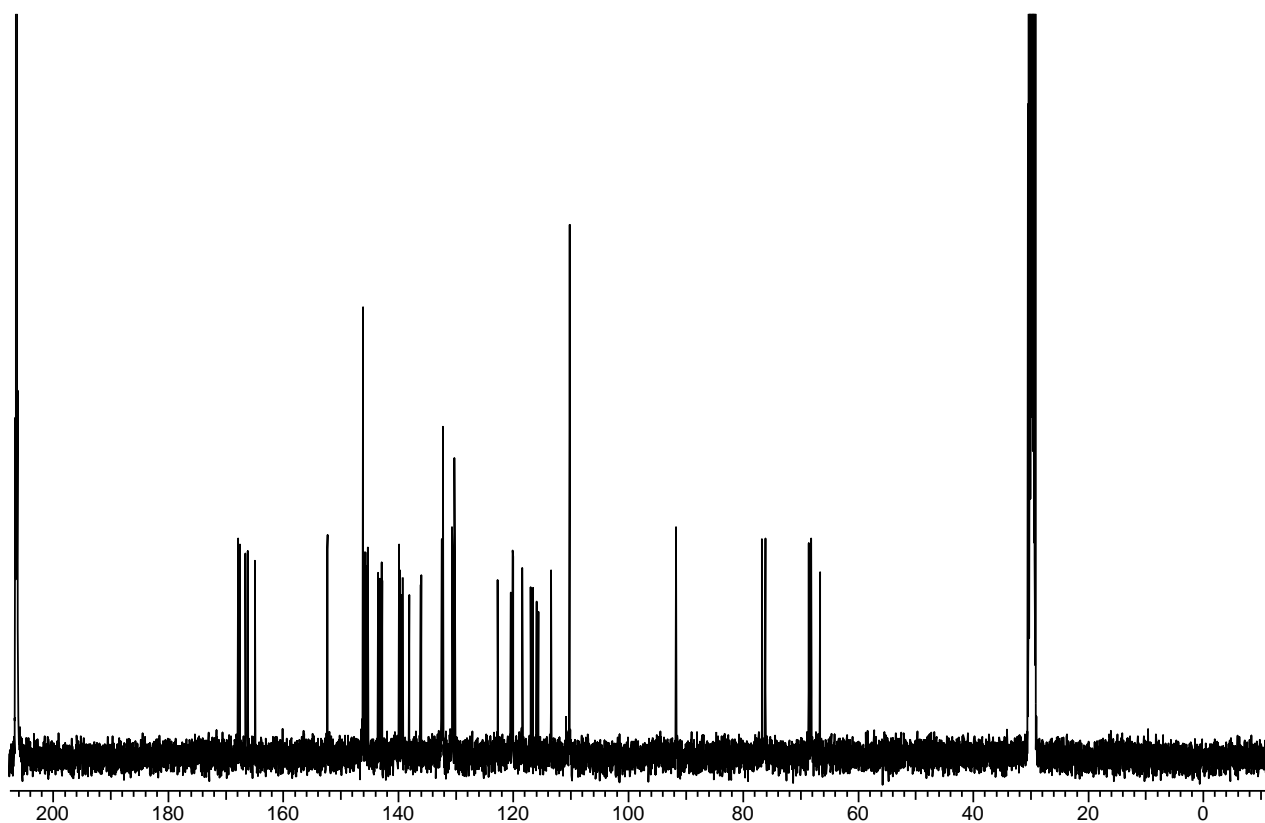

Figure S26. <sup>13</sup>C NMR spectrum of isoamariin phenazine derivative (**3a**) (100 MHz, in acetone-*d*<sub>6</sub>).

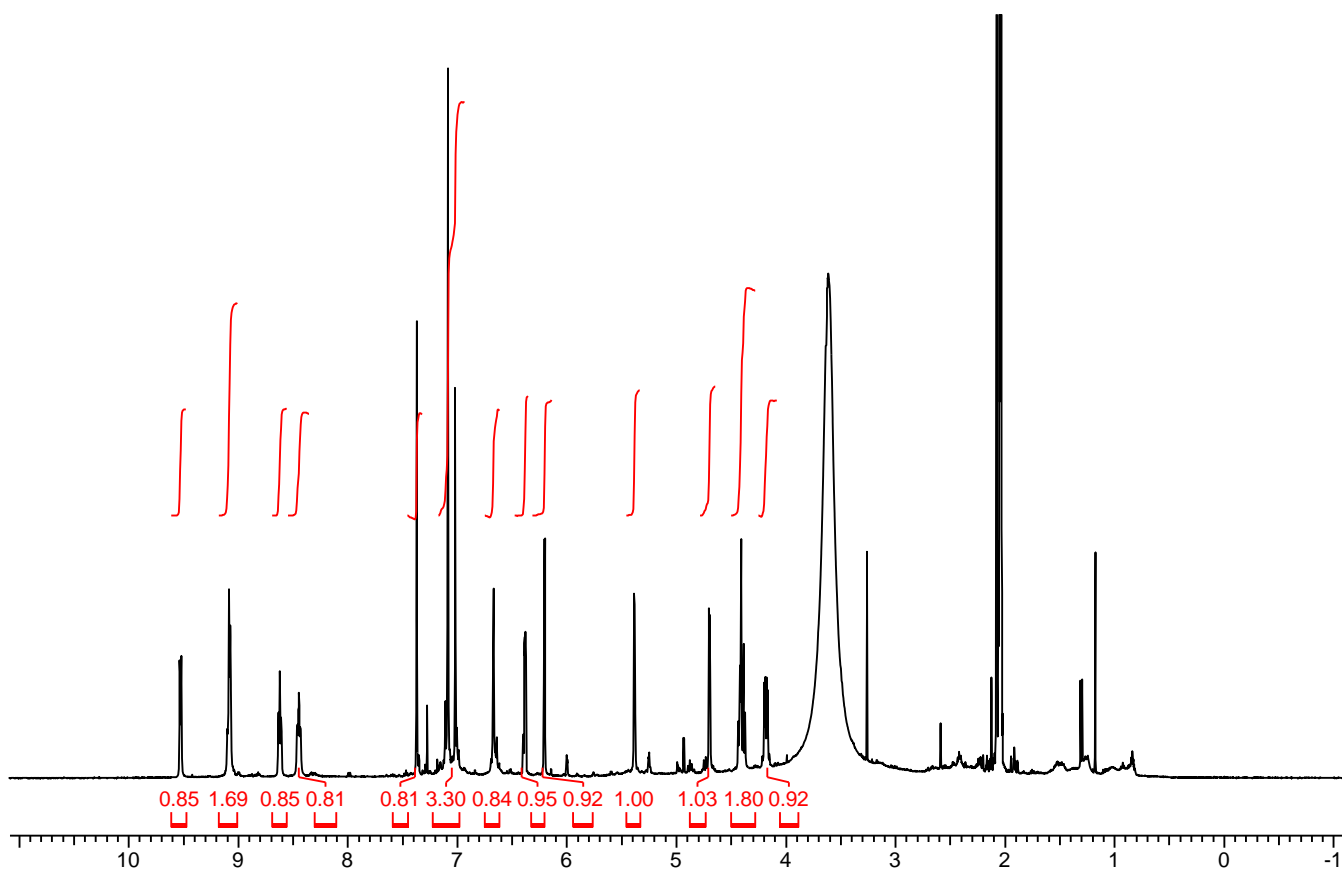

Figure S27. <sup>1</sup>H NMR spectrum of **9** in acetone-*d*<sub>6</sub> (500 MHz)

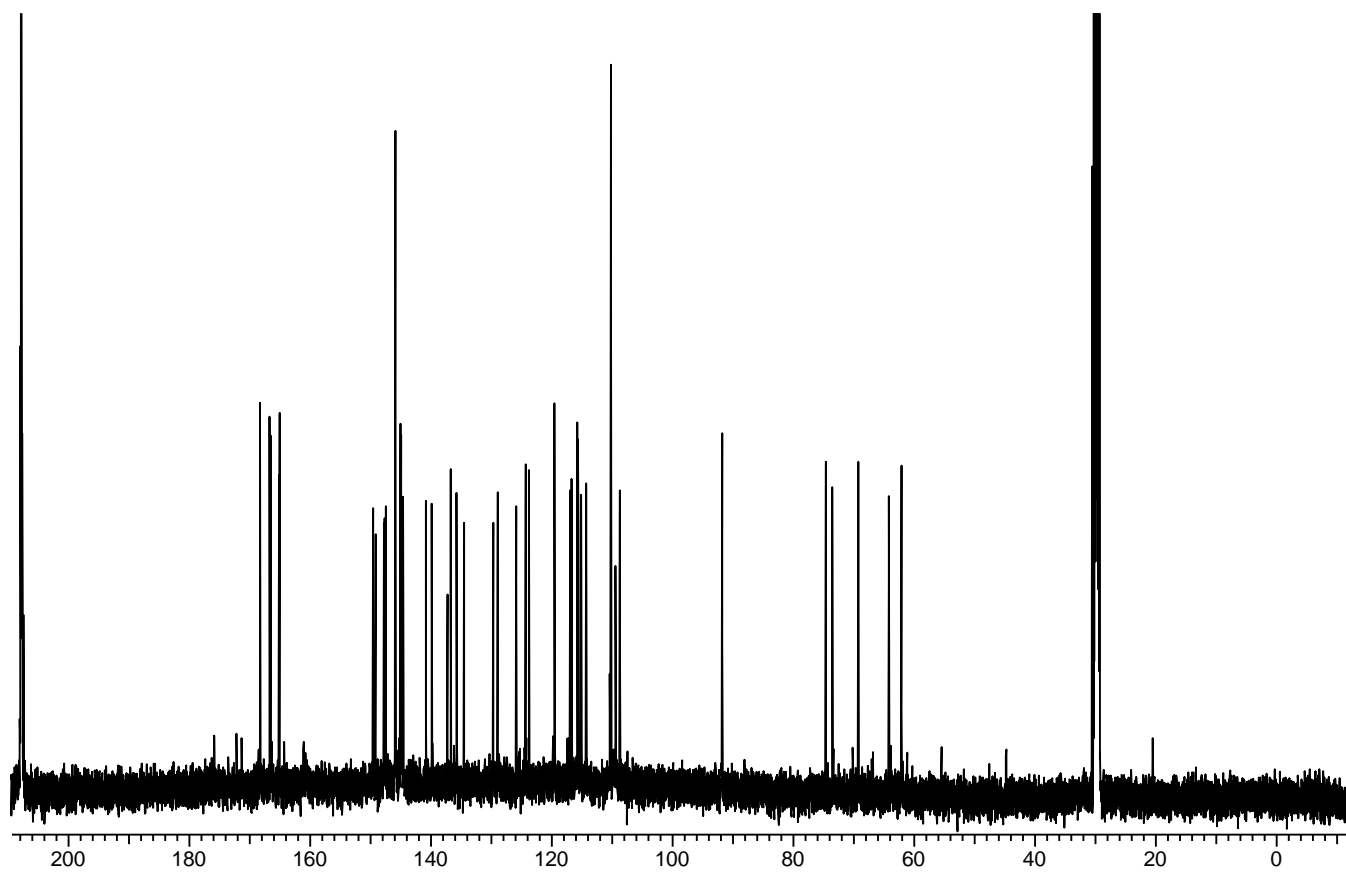

Figure S28.  $^{13}\text{C}$  NMR spectrum of **9** in acetone- $d_6$  (125 MHz)

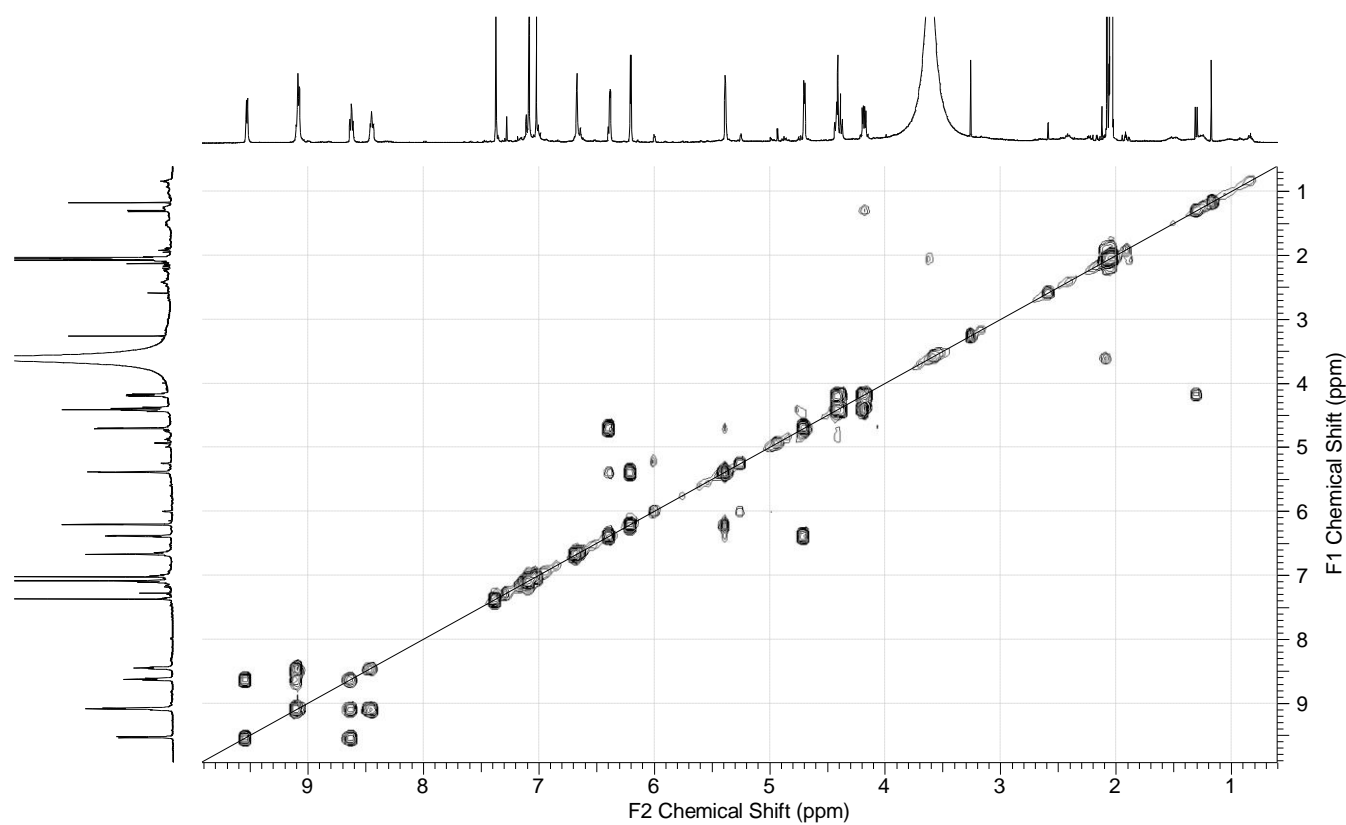

Figure S29.  $^1\text{H}$ - $^1\text{H}$  COSY spectrum of **9** in acetone- $d_6$  (500 MHz)



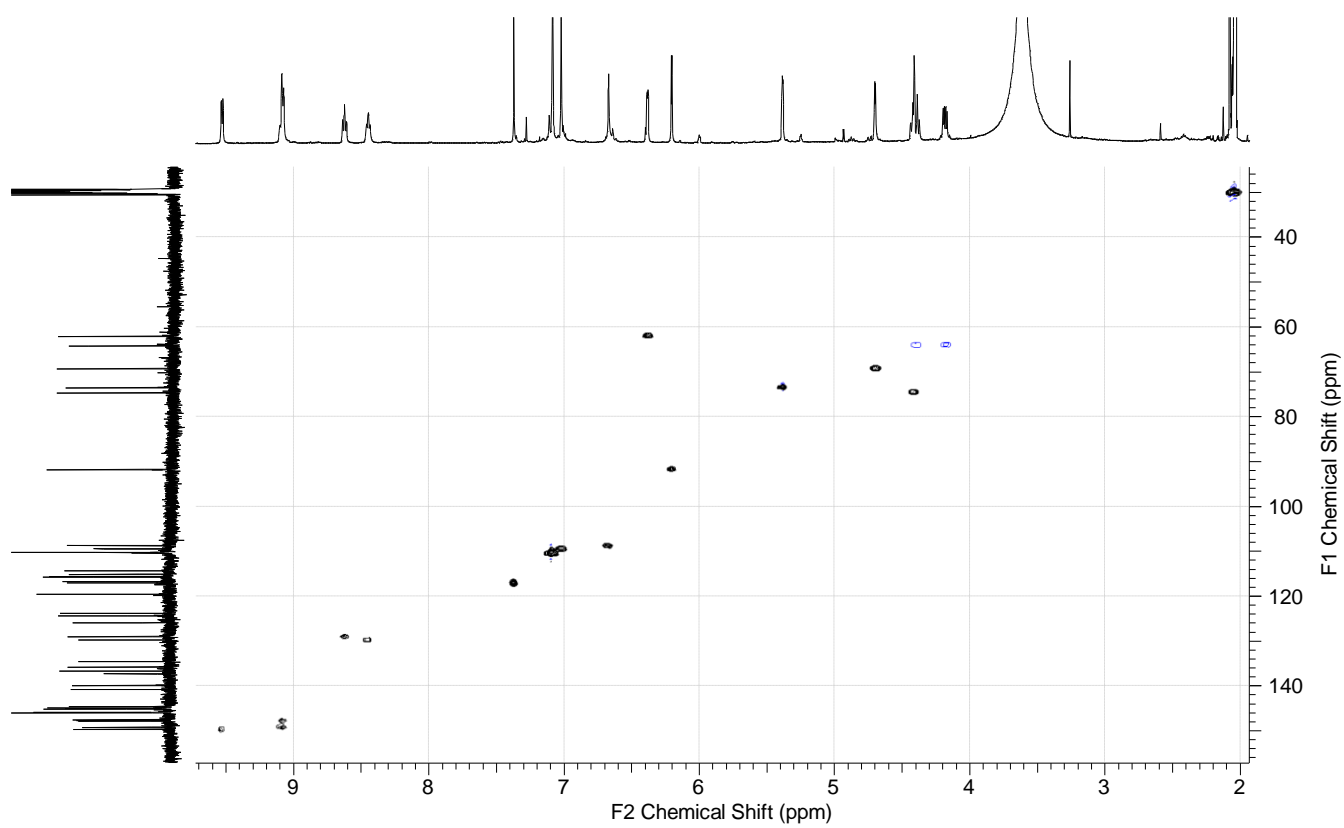

Figure S30. HSQC spectrum of **9** in acetone- $d_6$

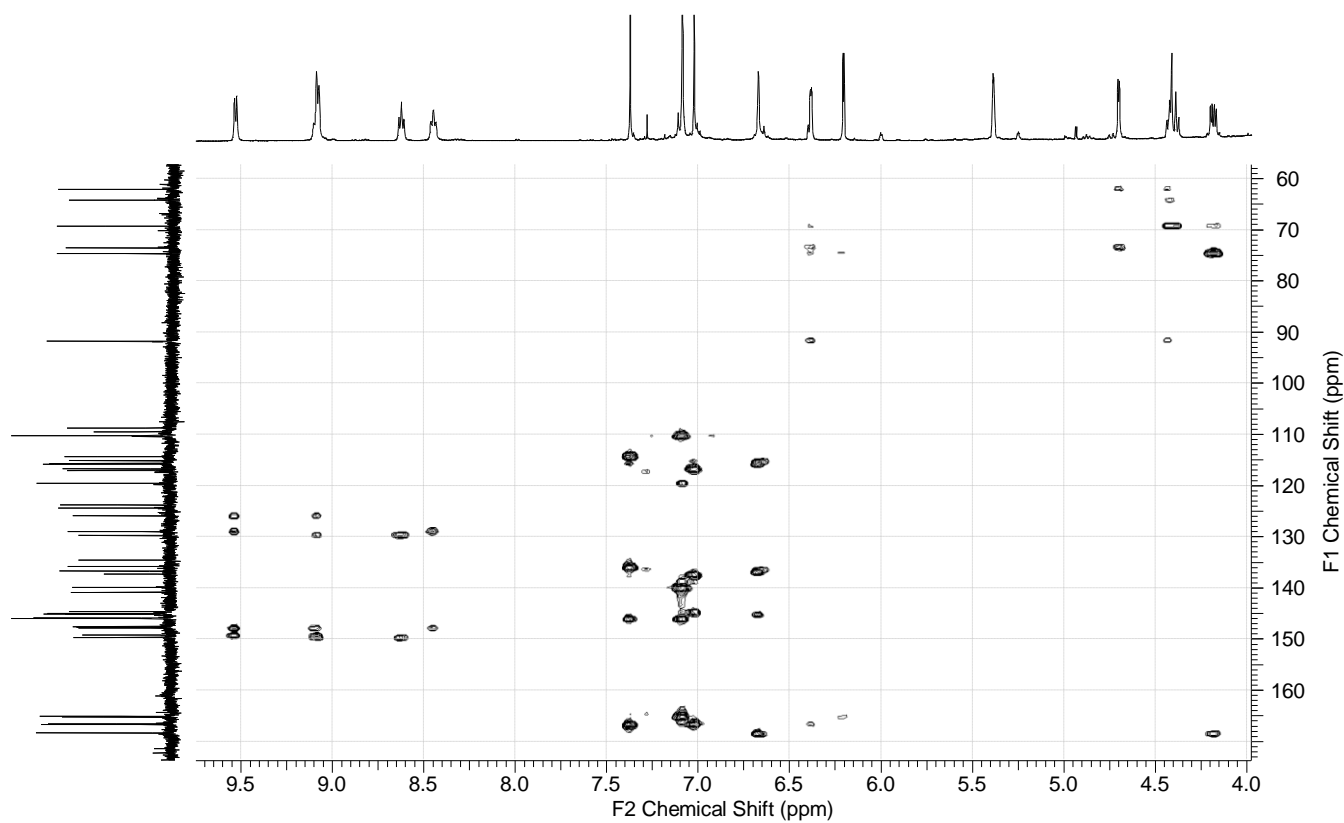

Figure S31. HMBC spectrum of **9** in acetone- $d_6$

## Computational Methods.

A conformational search was performed using the Monte Carlo method and the MMFF94 force field with Spartan '14 (Wavefunction, Irvine, CA). The obtained low-energy conformers within 6 kcal/mol were optimized at the B3LYP/6-31G(d,p) level in acetone (PCM). The vibrational frequencies were also calculated at the same level to confirm their stability, and no imaginary frequencies were found. <sup>1</sup>H NMR coupling constants of the low-energy conformers with Boltzmann populations greater than 1% were calculated at the B3LYP/6-31G(d,p)u+1s (using only the Fermi contact term) level in acetone (PCM) and scaled by using the slope parameter 0.94. The calculated data for each conformer were averaged according to the Boltzmann distribution theory at 298 K based on their relative Gibbs free energies. All DFT calculations were performed using Gaussian 09. GaussView was used to draw the three-dimensional molecular structures.

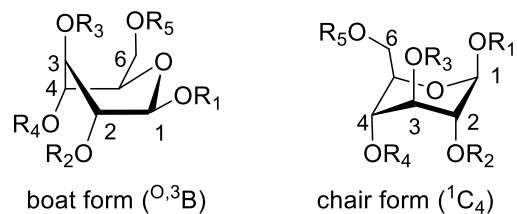

amariin (**1**)

$R_1$  = galloyl

A:  $R_2, R_4$  = DHHDP (6 membered),  $R_3, R_5$  = DHHDP (6 membered)

B:  $R_2, R_4$  = DHHDP (5 membered),  $R_3, R_5$  = DHHDP (6 membered)

C:  $R_2, R_4$  = DHHDP (6 membered),  $R_3, R_5$  = DHHDP (5 membered)

D:  $R_2, R_4$  = DHHDP (5 membered),  $R_3, R_5$  = DHHDP (5 membered)

acetyl amariin (**1a**)

$R_1$  = galloyl

$R_2, R_4$  = ADHHDP,  $R_3, R_5$  = ADHHDP

geraniin (**2**)

$R_1$  = galloyl

A:  $R_2, R_4$  = DHHDP (5 membered),  $R_3, R_5$  = HHDP

B:  $R_2, R_4$  = DHHDP (6 membered),  $R_3, R_5$  = HHDP

3,6-dimethoxyfurosins

$R_1$  = galloyl

A:  $R_2, R_4$  = DHHDP (5 membered),  $R_3, R_5$  = Me

B:  $R_2, R_4$  = DHHDP (6 membered),  $R_3, R_5$  = Me

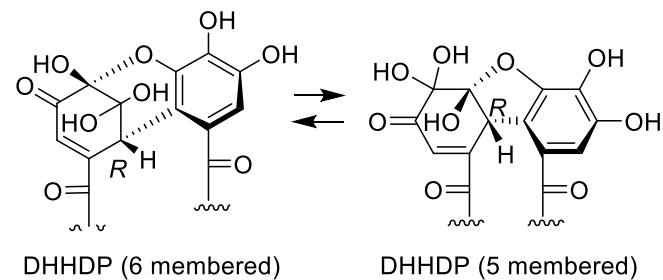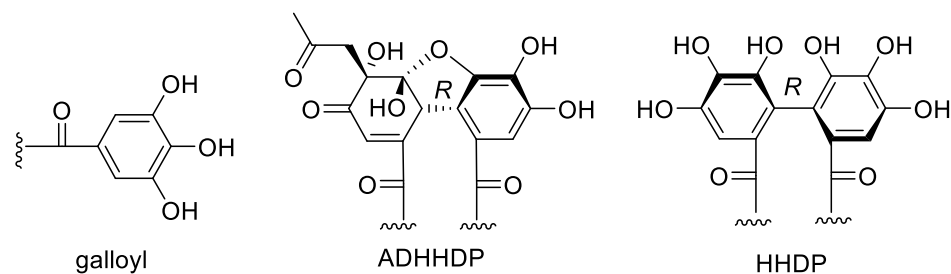

Figure S32. Structures of calculated ellagitannins.

Figure S33. Optimized  ${}^1\text{C}_4$  and  ${}^{\text{O},3}\text{B}$  conformers of acetyl amariin (**1a**) at the B3LYP/6-31G(d,p) level in acetone (PCM).

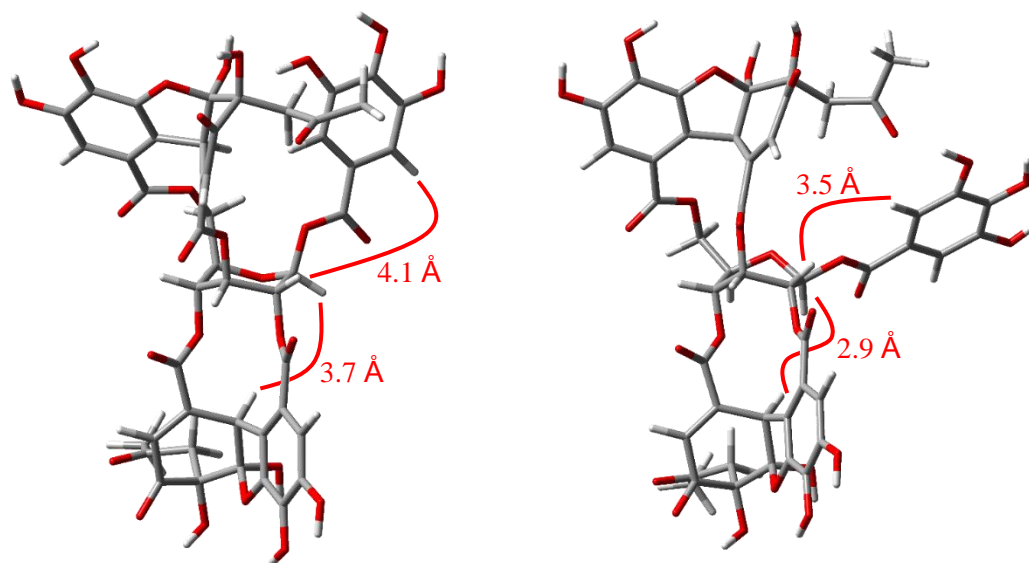

**1a** ( ${}^1\text{C}_4$ )-1

$\Delta G = +4.5$  kcal/mol

**1a** ( ${}^{\text{O},3}\text{B}$ )-1

$\Delta G = 0.0$  kcal/mol

Table S3. Important thermodynamic parameters of most stable conformers of **1a** at the B3LYP/6-31G(d,p) level in acetone (PCM).

| conformers                                | $E$ (a.u.)   | $E'$ (a.u.)  | $H$ (a.u.)   | $G$ (a.u.)   | $\Delta G$ (kcal/mol) |
|-------------------------------------------|--------------|--------------|--------------|--------------|-----------------------|
| <b>1a</b> ( ${}^{\text{O},3}\text{B}$ )-1 | -3919.037145 | -3918.231827 | -3918.164705 | -3918.334914 | 0.00                  |
| <b>1a</b> ( ${}^1\text{C}_4$ )-1          | -3919.030617 | -3918.224649 | -3918.157568 | -3918.327756 | 4.49                  |

*E*: total energy; *E'*: total energy with zero point energy; *H*: enthalpy; *G*: Gibbs free energy;  $\Delta G$ : relative Gibbs free energy at the B3LYP/6-31G(d,p) level in acetone (PCM).

Figure S34. Optimized conformers of acetyl amariin (**1a**) at the B3LYP/6-31G(d,p) level in acetone (PCM) with populations greater than 1% calculated from their relative Gibbs free energies ( $\Delta G$ ).

A: Chair form ( ${}^1C_4$ )

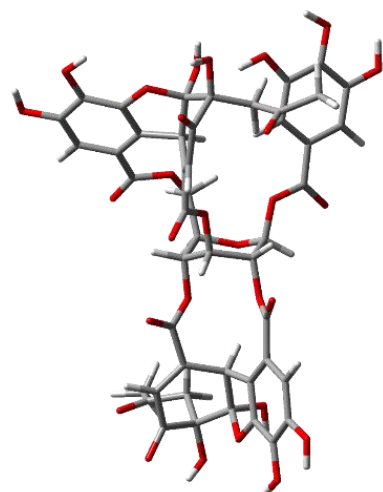

**1a** ( ${}^1C_4$ )-1

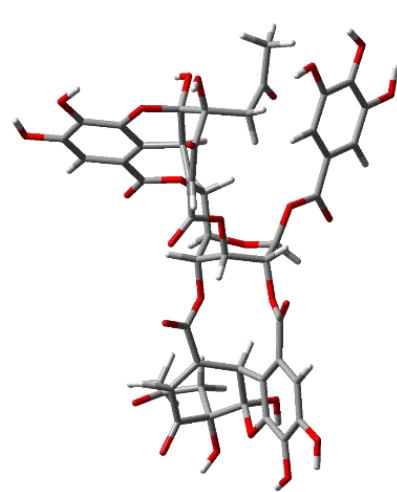

**1a** ( ${}^1C_4$ )-2

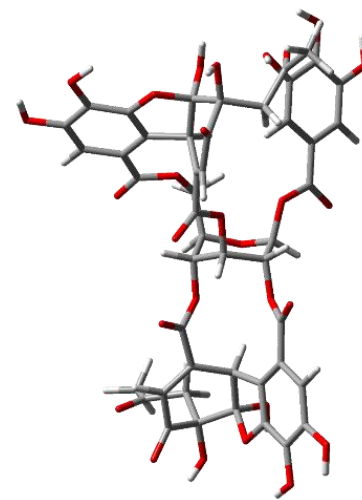

**1a** ( ${}^1C_4$ )-3

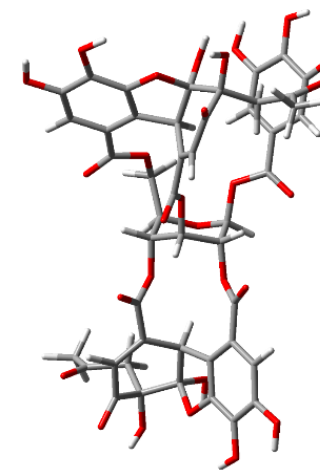

**1a** ( ${}^1C_4$ )-4

B: Boat form ( ${}^0,3B$ )

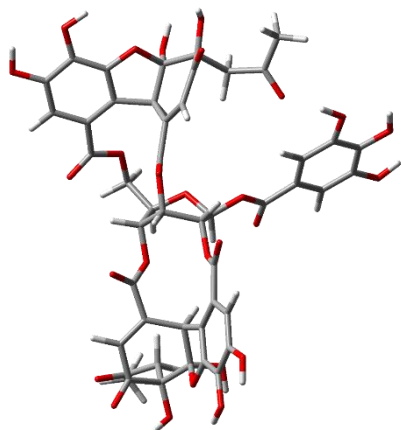

**1a ( ${}^0,3B$ )-1**

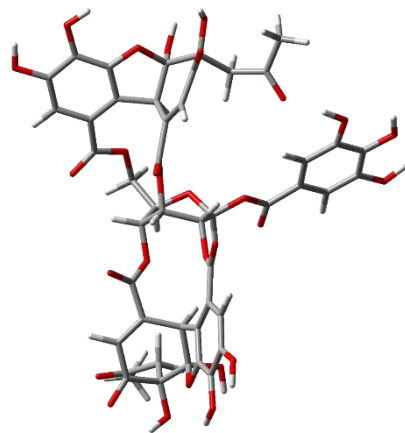

**1a ( ${}^0,3B$ )-2**

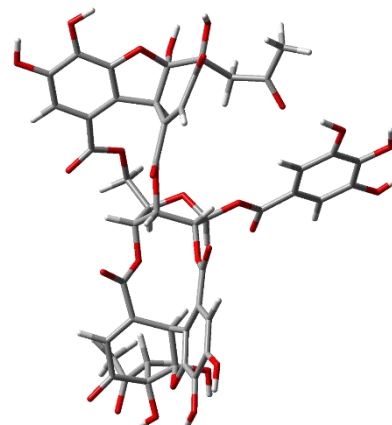

**1a ( ${}^0,3B$ )-3**

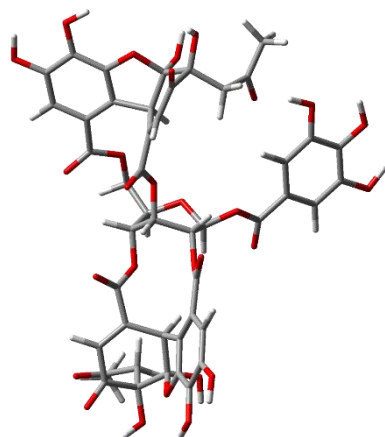

**1a ( ${}^0,3B$ )-4**

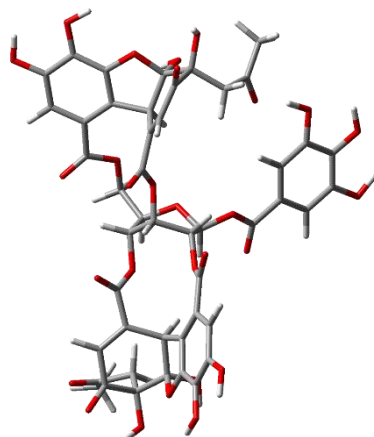

**1a ( ${}^0,3B$ )-5**

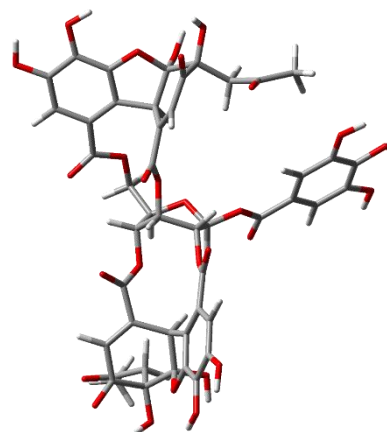

**1a ( ${}^0,3B$ )-6**

Table S2. Important thermodynamic parameters and conformational analysis of **1a** at the B3LYP/6-31G(d,p) level in acetone (PCM). A: Chair form ( ${}^1\text{C}_4$ ), B: Boat form ( ${}^{0,3}\text{B}$ ).

A

| conformers                       | $E$ (a.u.)   | $E'$ (a.u.)  | $H$ (a.u.)   | $G$ (a.u.)   | $\Delta G$ (kcal/mol) | $P_G$ (%) |
|----------------------------------|--------------|--------------|--------------|--------------|-----------------------|-----------|
| <b>1a</b> ( ${}^1\text{C}_4$ )-1 | -3919.030617 | -3918.224649 | -3918.157568 | -3918.327756 | 0.00                  | 67.8      |
| <b>1a</b> ( ${}^1\text{C}_4$ )-2 | -3919.029642 | -3918.223870 | -3918.156881 | -3918.326737 | 0.64                  | 23.0      |
| <b>1a</b> ( ${}^1\text{C}_4$ )-3 | -3919.028136 | -3918.222394 | -3918.155361 | -3918.325573 | 1.37                  | 6.7       |
| <b>1a</b> ( ${}^1\text{C}_4$ )-4 | -3919.028793 | -3918.222819 | -3918.156009 | -3918.324108 | 2.29                  | 1.4       |

$E$ : total energy;  $E'$ : total energy with zero point energy;  $H$ : enthalpy;  $G$ : Gibbs free energy;  $\Delta G$ : relative Gibbs free energy at the B3LYP/6-31G(d,p) level in acetone (PCM).  $P_G$ : conformational distribution calculated from relative Gibbs free energy.

B

| conformers                         | $E$ (a.u.)   | $E'$ (a.u.)  | $H$ (a.u.)   | $G$ (a.u.)   | $\Delta G$ (kcal/mol) | $P_G$ (%) |
|------------------------------------|--------------|--------------|--------------|--------------|-----------------------|-----------|
| <b>1a</b> ( ${}^{0,3}\text{B}$ )-1 | -3919.037145 | -3918.231827 | -3918.164705 | -3918.334914 | 0.00                  | 33.5      |
| <b>1a</b> ( ${}^{0,3}\text{B}$ )-2 | -3919.037145 | -3918.231826 | -3918.164705 | -3918.334899 | 0.01                  | 32.9      |
| <b>1a</b> ( ${}^{0,3}\text{B}$ )-3 | -3919.038203 | -3918.232288 | -3918.165473 | -3918.334404 | 0.32                  | 19.5      |
| <b>1a</b> ( ${}^{0,3}\text{B}$ )-4 | -3919.037433 | -3918.231548 | -3918.164648 | -3918.333742 | 0.74                  | 9.7       |
| <b>1a</b> ( ${}^{0,3}\text{B}$ )-5 | -3919.035158 | -3918.229635 | -3918.162571 | -3918.332275 | 1.66                  | 2.0       |
| <b>1a</b> ( ${}^{0,3}\text{B}$ )-6 | -3919.031576 | -3918.227154 | -3918.159481 | -3918.331819 | 1.94                  | 1.3       |

$E$ : total energy;  $E'$ : total energy with zero point energy;  $H$ : enthalpy;  $G$ : Gibbs free energy;  $\Delta G$ : relative Gibbs free energy at the B3LYP/6-31G(d,p) level in acetone (PCM).  $P_G$ : conformational distribution calculated from relative Gibbs free energy.

Table S3. Calculated  $^1\text{H}$  NMR coupling constants of glucose moiety in **1a** (ppm).  
A: Chair form ( $^1\text{C}_4$ ), B: Boat form ( $^{0,3}\text{B}$ ).

A

|             | calculated <sup>a</sup>        |                                |                                |                                |                                                     |                                                                    | experimental <sup>b</sup> |
|-------------|--------------------------------|--------------------------------|--------------------------------|--------------------------------|-----------------------------------------------------|--------------------------------------------------------------------|---------------------------|
|             | <b>1a</b> ( $^1\text{C}_4$ )-1 | <b>1a</b> ( $^1\text{C}_4$ )-2 | <b>1a</b> ( $^1\text{C}_4$ )-3 | <b>1a</b> ( $^1\text{C}_4$ )-4 | averaged- <b>1a</b> ( $^1\text{C}_4$ ) <sup>c</sup> | averaged- <b>1a</b> ( $^1\text{C}_4$ )<br>(corrected) <sup>d</sup> | <b>1a</b>                 |
| $J_{1-2}$   | 0.9                            | 0.4                            | 0.8                            | 1.3                            | 0.8                                                 | 0.7                                                                | 4.9                       |
| $J_{2-3}$   | 2.1                            | 1.6                            | 2.0                            | 2.4                            | 2.0                                                 | 1.8                                                                | 1.5                       |
| $J_{3-4}$   | 3.5                            | 3.5                            | 3.5                            | 3.4                            | 3.5                                                 | 3.3                                                                | 3.8                       |
| $J_{4-5}$   | 1.6                            | 2.2                            | 1.7                            | 1.3                            | 1.7                                                 | 1.6                                                                | 1.4                       |
| $J_{5-6a}$  | 2.7                            | 7.7                            | 4.7                            | 1.1                            | 4.0                                                 | 3.7                                                                | 1.2                       |
| $J_{5-6b}$  | 10.4                           | 10.4                           | 10.9                           | 9.2                            | 10.4                                                | 9.8                                                                | 3.2                       |
| $J_{6a-6b}$ | 14.3                           | 13.8                           | 14.2                           | 14.6                           | 14.2                                                | 13.4                                                               | 13.1                      |
| $J_{2-4}$   | 1.4                            | 1.3                            | 1.3                            | 1.4                            | 1.3                                                 | 1.3                                                                | 1.4                       |

<sup>a</sup> Calculated at the B3LYP/6-31G(d,p)u+1s (using only the Fermi contact term) level in acetone (PCM). <sup>b</sup> Measured in acetone (500 MHz). <sup>c</sup> Averaged according to the Boltzmann distribution theory at 298 K based on relative Gibbs free energies. <sup>d</sup> Scaled by using the slope parameter 0.94.

B

|             | calculated <sup>a</sup>          |                                  |                                  |                                  |                                  |                                  |                                                          | experimental <sup>b</sup>                                            |           |
|-------------|----------------------------------|----------------------------------|----------------------------------|----------------------------------|----------------------------------|----------------------------------|----------------------------------------------------------|----------------------------------------------------------------------|-----------|
|             | <b>1a</b> ( $^{0,3}\text{B}$ )-1 | <b>1a</b> ( $^{0,3}\text{B}$ )-2 | <b>1a</b> ( $^{0,3}\text{B}$ )-3 | <b>1a</b> ( $^{0,3}\text{B}$ )-4 | <b>1a</b> ( $^{0,3}\text{B}$ )-5 | <b>1a</b> ( $^{0,3}\text{B}$ )-6 | averaged- <b>1a</b><br>( $^{0,3}\text{B}$ ) <sup>c</sup> | averaged- <b>1a</b> ( $^{0,3}\text{B}$ )<br>(corrected) <sup>d</sup> | <b>1a</b> |
| $J_{1-2}$   | 5.0                              | 5.0                              | 5.0                              | 5.3                              | 5.3                              | 5.4                              | 5.1                                                      | 4.8                                                                  | 4.9       |
| $J_{2-3}$   | 1.8                              | 1.8                              | 1.7                              | 1.4                              | 1.4                              | 1.5                              | 1.7                                                      | 1.6                                                                  | 1.5       |
| $J_{3-4}$   | 4.3                              | 4.3                              | 4.3                              | 4.1                              | 4.1                              | 4.2                              | 4.3                                                      | 4.0                                                                  | 3.8       |
| $J_{4-5}$   | 1.0                              | 1.0                              | 1.0                              | 1.1                              | 1.1                              | 1.0                              | 1.0                                                      | 0.9                                                                  | 1.4       |
| $J_{5-6a}$  | 1.9                              | 1.9                              | 1.9                              | 1.8                              | 2.0                              | 1.7                              | 1.9                                                      | 1.8                                                                  | 1.2       |
| $J_{5-6b}$  | 2.4                              | 2.4                              | 2.4                              | 2.5                              | 2.4                              | 2.6                              | 2.4                                                      | 2.3                                                                  | 3.2       |
| $J_{6a-6b}$ | 14.0                             | 14.0                             | 14.0                             | 13.9                             | 13.9                             | 14.0                             | 14.0                                                     | 13.2                                                                 | 13.1      |
| $J_{2-4}$   | 1.7                              | 1.7                              | 1.7                              | 1.6                              | 1.6                              | 1.7                              | 1.7                                                      | 1.6                                                                  | 1.4       |

<sup>a</sup> Calculated at the B3LYP/6-31G(d,p)u+1s (using only the Fermi contact term) level in acetone (PCM). <sup>b</sup> Measured in acetone (500 MHz). <sup>c</sup> Averaged according to the Boltzmann distribution theory at 298 K based on relative Gibbs free energies. <sup>d</sup> Scaled by using the slope parameter 0.94.



Figure S35. Optimized  ${}^1C_4$  and  ${}^0_3B$  conformers of amariin (**1**) at the B3LYP/6-31G(d,p) level in acetone (PCM).

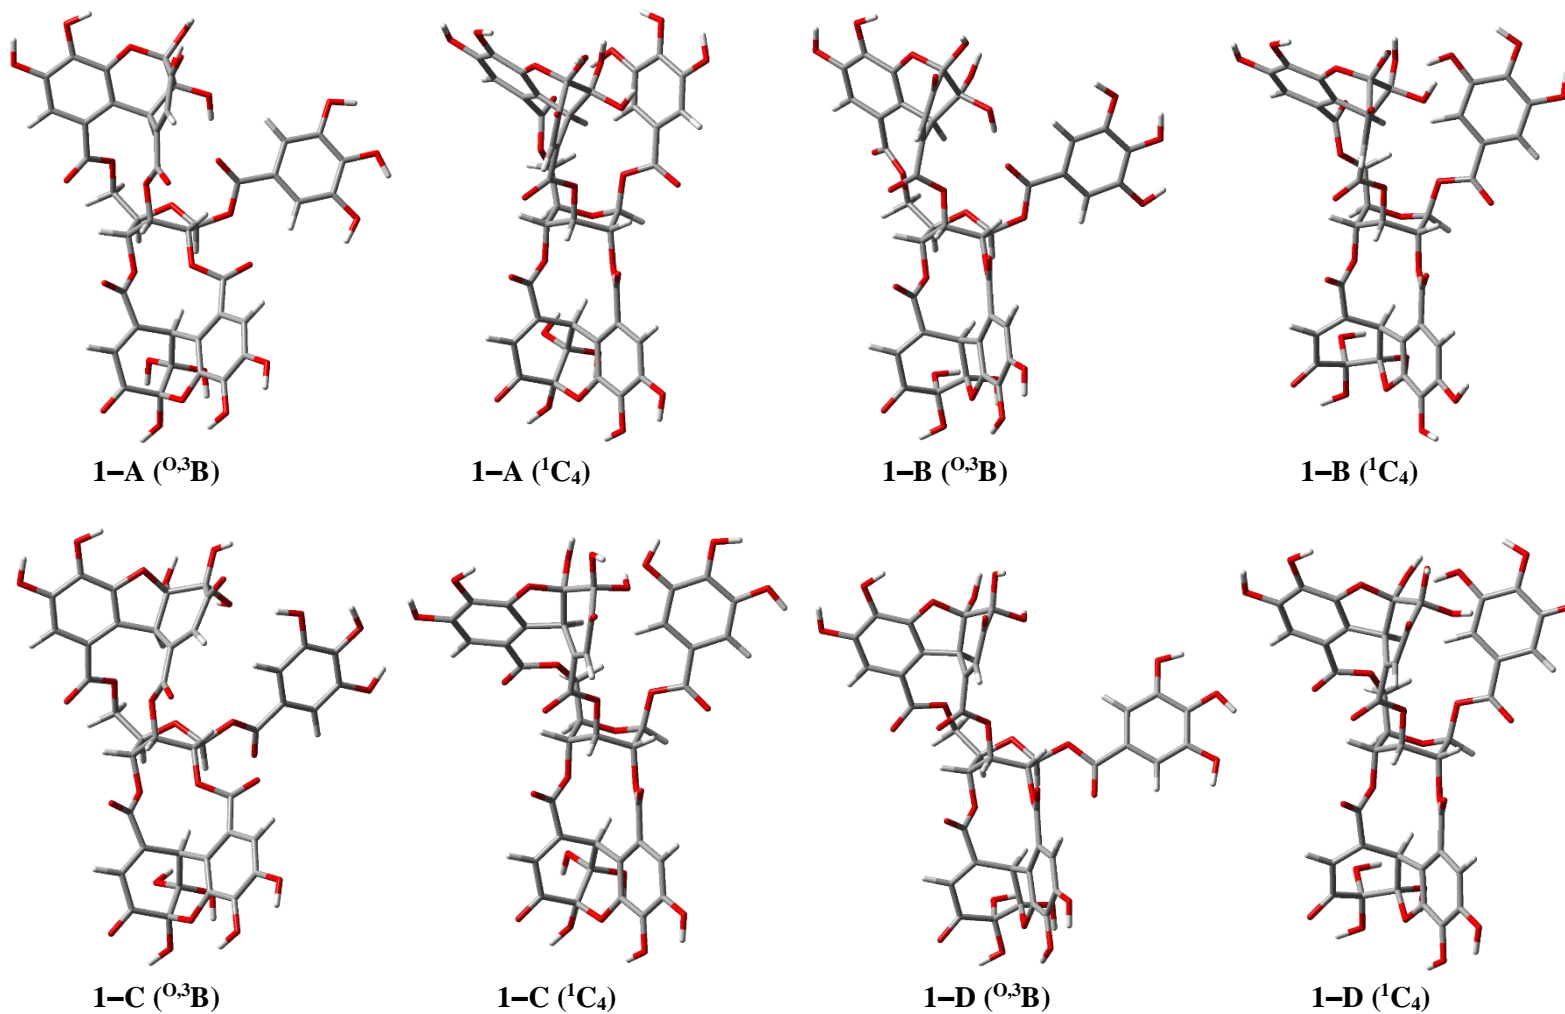

Table S4. Important thermodynamic parameters and conformational analysis of **1** at the B3LYP/6-31G(d,p) level in acetone (PCM).

| conformers                       | $E$ (a.u.)   | $E'$ (a.u.)  | $H$ (a.u.)   | $G$ (a.u.)   | $\Delta G$ (kcal/mol) |
|----------------------------------|--------------|--------------|--------------|--------------|-----------------------|
| <b>1-A</b> ( $^0,^3\mathbf{B}$ ) | -3685.559950 | -3684.875447 | -3684.816344 | -3684.966683 | 0.01                  |
| <b>1-A</b> ( $^1\mathbf{C}_4$ )  | -3685.559488 | -3684.874355 | -3684.815433 | -3684.965775 | 0.58                  |
| <b>1-B</b> ( $^0,^3\mathbf{B}$ ) | -3685.556145 | -3684.872692 | -3684.813042 | -3684.966706 | 0.00                  |
| <b>1-B</b> ( $^1\mathbf{C}_4$ )  | -3685.556909 | -3684.872064 | -3684.813060 | -3684.964099 | 1.64                  |
| <b>1-C</b> ( $^0,^3\mathbf{B}$ ) | -3685.559637 | -3684.875226 | -3684.816185 | -3684.966441 | 0.17                  |
| <b>1-C</b> ( $^1\mathbf{C}_4$ )  | -3685.557725 | -3684.873229 | -3684.814041 | -3684.965099 | 1.01                  |
| <b>1-D</b> ( $^0,^3\mathbf{B}$ ) | -3685.552323 | -3684.869791 | -3684.809697 | -3684.964947 | 1.10                  |
| <b>1-D</b> ( $^1\mathbf{C}_4$ )  | -3685.555858 | -3684.871943 | -3684.812508 | -3684.963745 | 1.86                  |

*E*: total energy;  $E'$ : total energy with zero point energy;  $H$ : enthalpy;  $G$ : Gibbs free energy;  $\Delta G$ : relative Gibbs free energy at the B3LYP/6-31G(d,p) level in acetone (PCM).

Figure S36. Optimized  ${}^1\text{C}_4$  and  ${}^{\text{O},3}\text{B}$  conformers of geraniin (**2**) at the B3LYP/6-31G(d,p) level in acetone (PCM).

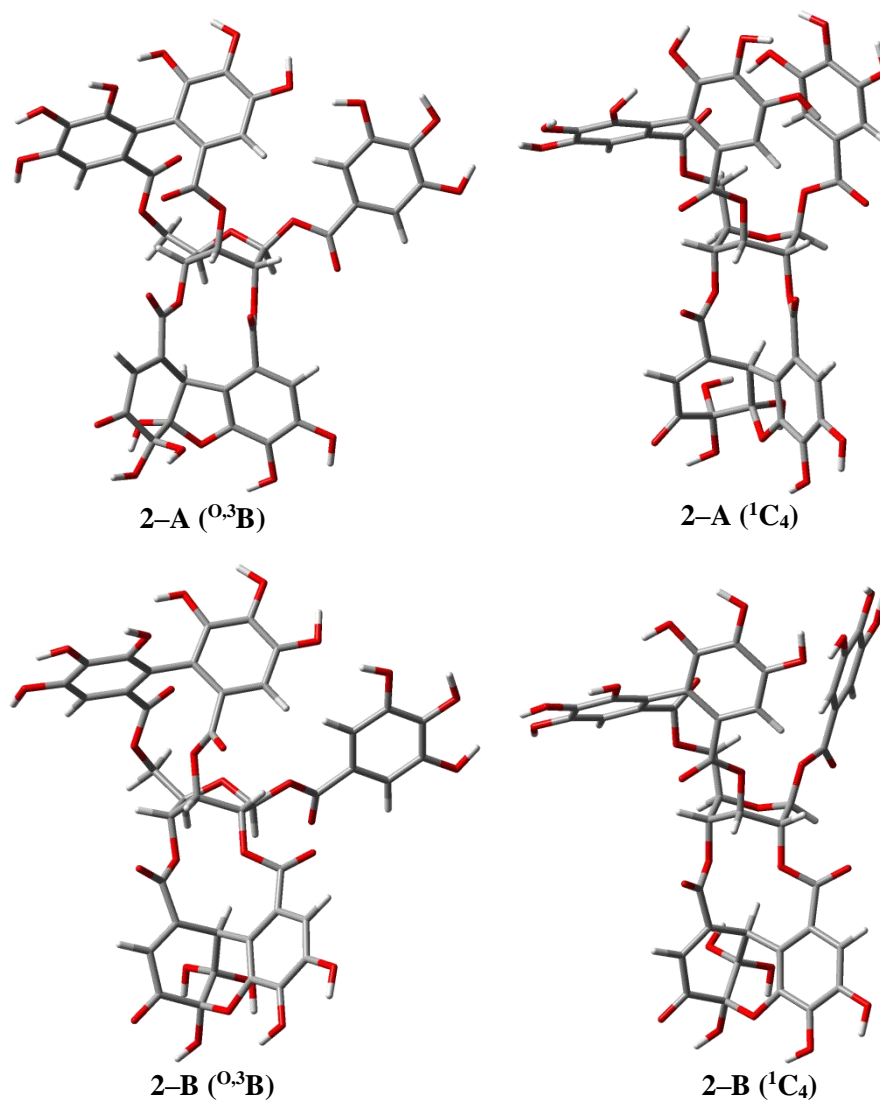

Table S5. Important thermodynamic parameters and conformational analysis of **2** at the B3LYP/6-31G(d,p) level in acetone (PCM).

| conformers                                        | $E$ (a.u.)   | $E'$ (a.u.)  | $H$ (a.u.)   | $G$ (a.u.)   | $\Delta G$ (kcal/mol) |
|---------------------------------------------------|--------------|--------------|--------------|--------------|-----------------------|
| <b>2-A (<math>{}^{\text{O},3}\text{B}</math>)</b> | -3610.345974 | -3609.667655 | -3609.608438 | -3609.760436 | 8.37                  |
| <b>2-A (<math>{}^1\text{C}_4</math>)</b>          | -3610.357796 | -3609.679650 | -3609.620037 | -3609.771910 | 1.17                  |
| <b>2-B (<math>{}^{\text{O},3}\text{B}</math>)</b> | -3610.352473 | -3609.674640 | -3609.614965 | -3609.767234 | 4.10                  |
| <b>2-B (<math>{}^1\text{C}_4</math>)</b>          | -3610.361707 | -3609.682788 | -3609.623667 | -3609.773775 | 0.00                  |

$E$ : total energy;  $E'$ : total energy with zero point energy;  $H$ : enthalpy;  $G$ : Gibbs free energy;  $\Delta G$ : relative Gibbs free energy at the B3LYP/6-31G(d,p) level in acetone (PCM).

Figure S37. Optimized  ${}^1C_4$  and  ${}^{0,3}B$  conformers of 3,6-dimethoxyfurosin at the B3LYP/6-31G(d,p) level in acetone (PCM).

\*In order to avoid hydrogen bonds between hydroxy moieties of 3 and 6 position, calculation was performed with 3,6-dimethoxyfurosin.

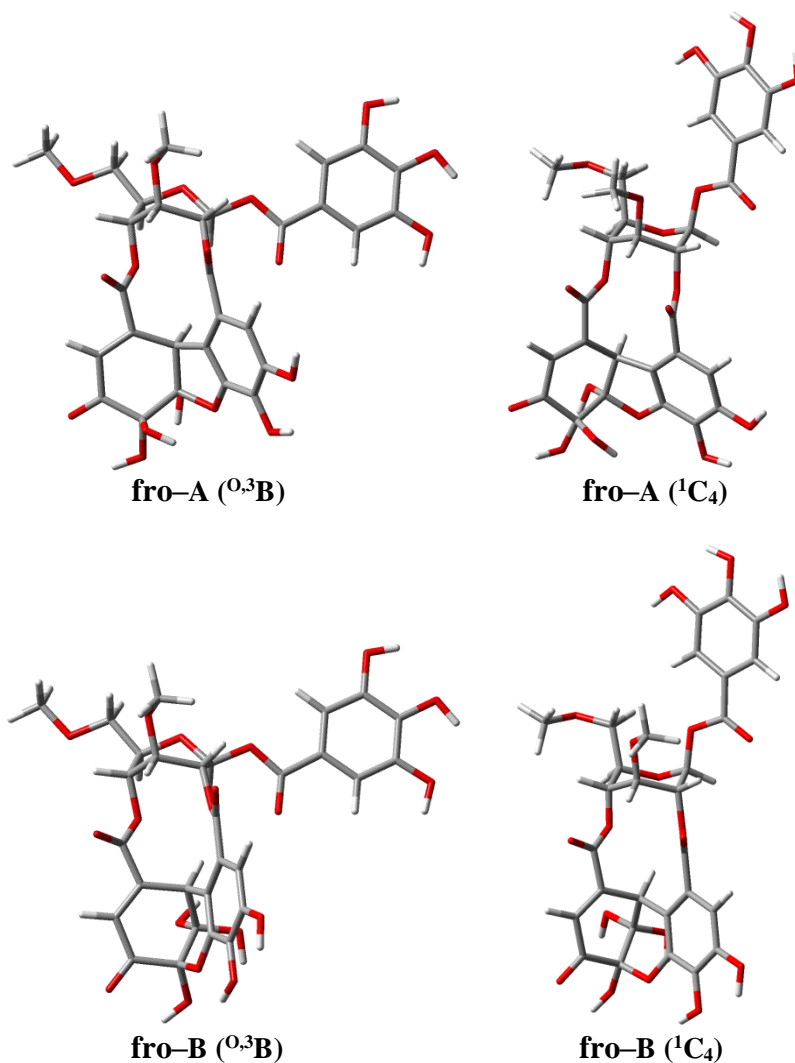

Table S6. Important thermodynamic parameters and conformational analysis of 3,6-dimethoxyfurosin at the B3LYP/6-31G(d,p) level in acetone (PCM).

| conformers                            | $E$ (a.u.)   | $E'$ (a.u.)  | $H$ (a.u.)   | $G$ (a.u.)   | $\Delta G$ (kcal/mol) |
|---------------------------------------|--------------|--------------|--------------|--------------|-----------------------|
| <b>fro-A (<math>{}^{0,3}B</math>)</b> | -2550.010098 | -2549.462581 | -2549.417838 | -2549.540987 | 6.31                  |
| <b>fro-A (<math>{}^1C_4</math>)</b>   | -2550.009996 | -2549.461914 | -2549.417067 | -2549.542069 | 5.63                  |
| <b>fro-B (<math>{}^{0,3}B</math>)</b> | -2550.018183 | -2549.470502 | -2549.425640 | -2549.548647 | 1.51                  |
| <b>fro-B (<math>{}^1C_4</math>)</b>   | -2550.019129 | -2549.470926 | -2549.426129 | -2549.551048 | 0.00                  |

$E$ : total energy;  $E'$ : total energy with zero point energy;  $H$ : enthalpy;  $G$ : Gibbs free energy;  $\Delta G$ : relative Gibbs free energy at the B3LYP/6-31G(d,p) level in acetone (PCM).

### Cartesian coordinates of the optimized geometries.

Cartesian coordinates of the low-energy conformer of acetyl amariin [**1a** ( $^{13}\text{C}_4$ )-**1**] at the B3LYP/6-31G(d,p) level in acetone (PCM).

|   |             |             |             |
|---|-------------|-------------|-------------|
| C | -1.39403500 | 1.11690200  | -1.63587000 |
| O | -0.67237300 | 1.64438300  | -2.45285900 |
| C | -1.63002600 | 2.73622200  | 1.72296300  |
| O | -0.74171800 | 3.39764100  | 2.23386900  |
| C | -2.89105400 | 1.11005400  | -1.70146600 |
| C | -3.42357300 | 1.07371900  | -2.93912300 |
| C | -4.87699300 | 0.92629900  | -3.14186000 |
| C | -5.61105400 | 0.22281100  | -1.99215900 |
| C | -5.23351000 | 1.04135800  | -0.73433600 |
| C | -3.71961700 | 1.16348300  | -0.41686600 |
| C | -3.67551400 | 2.57762400  | 0.17502400  |
| C | -4.81144700 | 3.22220000  | -0.30375500 |
| C | -5.08965800 | 4.56357800  | -0.08511800 |
| C | -4.15368600 | 5.30281800  | 0.66180400  |
| C | -3.03019600 | 4.67342600  | 1.19071500  |
| C | -2.77953200 | 3.30532500  | 0.97548200  |
| O | -4.36567900 | 6.62244300  | 0.90669400  |
| O | -6.19609300 | 5.21284800  | -0.53465700 |
| O | -5.49772200 | 1.39499300  | -4.08236600 |
| C | -5.22951100 | -1.25866100 | -1.80704800 |
| O | -5.90476500 | 0.57628100  | 0.40459200  |
| O | -5.66164700 | 2.40248900  | -1.00676900 |
| H | -3.39563500 | 0.39843100  | 0.28684700  |
| O | -7.00457000 | 0.29726200  | -2.18908800 |
| C | 0.67769200  | 0.47135400  | 2.10070500  |
| C | 1.01909700  | 1.03000200  | 0.71249000  |
| C | 0.46617500  | 0.19998100  | -0.46093800 |
| C | 0.75214500  | -1.29611100 | -0.26292600 |
| C | 0.55752400  | -1.79913200 | 1.17234400  |
| O | 1.01077800  | -0.93035000 | 2.17019100  |
| O | 2.46313000  | 0.89637600  | 0.67000700  |
| O | 2.14890800  | -1.50642700 | -0.57039600 |
| C | -0.72664300 | 0.76517000  | 2.69802900  |
| O | -0.95475300 | 0.38120700  | -0.58361400 |
| O | -0.84333300 | -2.09088100 | 1.34075600  |
| C | -1.13585500 | -3.21757200 | 2.07355100  |
| O | -0.27426000 | -3.97881700 | 2.47153100  |
| C | -2.58510300 | -3.39662900 | 2.30540000  |
| C | -2.98358200 | -4.57198000 | 2.95862400  |
| C | -4.33294100 | -4.80250800 | 3.20352700  |
| C | -5.28241200 | -3.85785800 | 2.79262400  |
| C | -4.88392500 | -2.68029100 | 2.14076900  |
| C | -3.53389500 | -2.44321000 | 1.89592000  |
| O | -4.72815600 | -5.94137900 | 3.83844400  |
| O | -6.59233400 | -4.12459700 | 3.05091400  |
| O | -5.92129900 | -1.86358800 | 1.79572700  |
| O | -1.69194500 | 1.38944400  | 1.82785500  |
| C | 3.17433200  | 1.52441400  | -0.28751300 |
| O | 2.72654400  | 2.34055900  | -1.06353400 |
| C | 2.44859500  | -1.67232200 | -1.88881800 |
| O | 1.59117300  | -1.82312600 | -2.73928600 |
| C | 4.61019800  | 1.10288200  | -0.17107400 |
| C | 5.53551900  | 2.08011600  | -0.20539100 |
| C | 6.94053200  | 1.79569700  | 0.14922800  |
| C | 7.11341200  | 0.62459700  | 1.12869900  |
| C | 6.42985200  | -0.58114800 | 0.43484500  |
| C | 4.94032900  | -0.37949700 | 0.02729700  |
| C | 4.90409300  | -1.13987700 | -1.30990600 |
| C | 6.22998400  | -1.24990800 | -1.72058200 |

|   |             |             |             |
|---|-------------|-------------|-------------|
| C | 6.62834800  | -1.82490700 | -2.91970000 |
| C | 5.62314900  | -2.30979400 | -3.77370900 |
| C | 4.28946400  | -2.22602000 | -3.38839400 |
| C | 3.90639900  | -1.65830700 | -2.15757200 |
| O | 5.95012900  | -2.88165900 | -4.96295700 |
| O | 7.92130400  | -1.94876600 | -3.32182600 |
| O | 7.91310900  | 2.35703600  | -0.32935700 |
| C | 6.48956800  | 0.85126200  | 2.51905000  |
| O | 6.53613600  | -1.74300100 | 1.18438500  |
| O | 7.14196200  | -0.75065000 | -0.82983700 |
| H | 4.28278900  | -0.81723100 | 0.77876800  |
| O | 8.48408400  | 0.34624800  | 1.30732400  |
| C | -5.32806800 | -2.06767700 | -3.09659400 |
| O | -4.95611100 | -1.58504300 | -4.15393000 |
| C | -5.85614900 | -3.47384300 | -2.98340200 |
| C | 6.86695500  | 2.18746300  | 3.14587100  |
| C | 7.02747100  | 2.21797500  | 4.64422500  |
| O | 6.99278300  | 3.18414000  | 2.45183700  |
| H | -2.78958700 | 1.15041100  | -3.81609900 |
| H | -2.34839800 | 5.24513500  | 1.80814900  |
| H | -5.19726000 | 6.88601100  | 0.48181900  |
| H | -6.77357400 | 4.59640900  | -1.00945000 |
| H | -4.19350500 | -1.36111700 | -1.46288100 |
| H | -5.86426300 | -1.68269400 | -1.02568000 |
| H | -6.85038000 | 0.54353700  | 0.17294500  |
| H | -7.13156000 | 0.89072500  | -2.95346900 |
| H | 1.40631900  | 0.91953500  | 2.77928400  |
| H | 0.74390600  | 2.08109200  | 0.61843900  |
| H | 0.93015800  | 0.54099600  | -1.38600900 |
| H | 0.13514100  | -1.88282400 | -0.94357700 |
| H | 1.12077200  | -2.72075100 | 1.31214400  |
| H | -1.18471700 | -0.17721800 | 2.98792200  |
| H | -0.60676300 | 1.39932100  | 3.57667700  |
| H | -2.24505000 | -5.29927100 | 3.27208800  |
| H | -3.21081800 | -1.53458300 | 1.40571000  |
| H | -5.69426000 | -5.92133000 | 3.92384600  |
| H | -7.12205200 | -3.37676300 | 2.72972400  |
| H | -5.63714900 | -1.02519200 | 1.38404700  |
| H | 5.26208900  | 3.10241100  | -0.44648200 |
| H | 3.52637600  | -2.62032300 | -4.04786400 |
| H | 6.91527200  | -2.86124500 | -5.05965400 |
| H | 8.51279300  | -1.61613800 | -2.62968700 |
| H | 5.39410900  | 0.83432300  | 2.47084600  |
| H | 6.78255600  | 0.01799300  | 3.16186800  |
| H | 7.47447300  | -1.83449100 | 1.42305000  |
| H | 8.94915500  | 0.87998700  | 0.63574600  |
| H | -6.91234500 | -3.43769600 | -2.69094800 |
| H | -5.75489500 | -3.99779300 | -3.93428000 |
| H | -5.32811200 | -4.01832200 | -2.19292200 |
| H | 7.14788300  | 3.24382000  | 4.99386500  |
| H | 6.16535200  | 1.75050700  | 5.13219900  |
| H | 7.90781100  | 1.62694500  | 4.92343700  |

Cartesian coordinates of the low-energy conformer of acetonyl amariin [**1a** (<sup>1</sup>C<sub>4</sub>)-**2**] at the B3LYP/6-31G(d,p) level in acetone (PCM).

|   |             |             |             |
|---|-------------|-------------|-------------|
| C | -1.43763200 | -1.73336900 | 1.12015400  |
| O | -0.67132000 | -2.66151900 | 1.25054700  |
| C | -1.92340400 | -1.92409800 | -2.45508100 |
| O | -1.17361100 | -2.12469600 | -3.39348600 |
| C | -2.91642300 | -1.84087100 | 1.35757900  |
| C | -3.28991700 | -2.30430900 | 2.56715400  |
| C | -4.69838000 | -2.32619700 | 2.97968500  |
| C | -5.66169700 | -1.44174500 | 2.16716700  |
| C | -5.37540700 | -1.71925100 | 0.68223500  |
| C | -3.89372600 | -1.52130200 | 0.23284400  |
| C | -3.78693700 | -2.61133900 | -0.84419300 |
| C | -4.78727700 | -3.53231700 | -0.54295200 |
| C | -4.97486400 | -4.71812500 | -1.24173700 |
| C | -4.09492100 | -4.99227000 | -2.30485100 |
| C | -3.10882500 | -4.07093700 | -2.65127400 |
| C | -2.94042800 | -2.87232900 | -1.93836800 |
| O | -4.22946400 | -6.13644200 | -3.02383300 |
| O | -5.94886300 | -5.62713500 | -0.97491600 |
| O | -5.12257900 | -2.93744400 | 3.94994100  |
| C | -5.37397400 | 0.04086800  | 2.56782500  |
| O | -6.27120900 | -0.97835800 | -0.07363800 |
| O | -5.61379800 | -3.14974900 | 0.48192300  |
| H | -3.73733000 | -0.50777200 | -0.13889700 |
| O | -6.98662900 | -1.79564400 | 2.46425700  |
| C | 0.38271700  | 0.24285000  | -1.87141700 |
| C | 0.80404400  | -0.73796900 | -0.77397200 |
| C | 0.36678700  | -0.29776700 | 0.63206100  |
| C | 0.74367600  | 1.17141600  | 0.88806300  |
| C | 0.64286300  | 2.12473000  | -0.31676000 |
| O | 0.89715700  | 1.55421500  | -1.57389600 |
| O | 2.25132700  | -0.66566200 | -0.80819300 |
| O | 2.15277900  | 1.16966900  | 1.22061500  |
| C | -1.12774700 | 0.32776400  | -2.21220400 |
| O | -1.05628400 | -0.46864200 | 0.81135100  |
| O | -0.65085400 | 2.75951700  | -0.28988000 |
| C | -0.66186500 | 4.05263800  | -0.77037400 |
| O | 0.36425500  | 4.63600000  | -1.06791100 |
| C | -2.01498800 | 4.63290700  | -0.89501400 |
| C | -2.08391200 | 5.92917100  | -1.43063600 |
| C | -3.31952400 | 6.54055700  | -1.60863000 |
| C | -4.48507600 | 5.85326400  | -1.25221400 |
| C | -4.42088900 | 4.55815800  | -0.71227000 |
| C | -3.18332200 | 3.93985700  | -0.52844400 |
| O | -3.39367900 | 7.79994300  | -2.12777900 |
| O | -5.67990100 | 6.48003000  | -1.44109700 |
| O | -5.63453100 | 4.01971200  | -0.42370700 |
| O | -1.93285800 | -0.77152200 | -1.75181100 |
| C | 2.98734500  | -1.60305800 | -0.17497400 |
| O | 2.54873600  | -2.62586200 | 0.30286800  |
| C | 2.47714600  | 0.83431700  | 2.49849000  |
| O | 1.64229300  | 0.72423100  | 3.37734200  |
| C | 4.43374900  | -1.20411100 | -0.23001000 |
| C | 5.30956900  | -2.14823800 | -0.62246700 |
| C | 6.71226900  | -1.79617300 | -0.91917500 |
| C | 6.90983400  | -0.34531300 | -1.38189500 |
| C | 6.31299600  | 0.52020700  | -0.24352000 |
| C | 4.82877000  | 0.23187500  | 0.12764100  |
| C | 4.87479500  | 0.42717900  | 1.65364100  |
| C | 6.21559900  | 0.31125100  | 2.01058600  |
| C | 6.67915000  | 0.36457400  | 3.31825000  |

|   |             |             |             |
|---|-------------|-------------|-------------|
| C | 5.72814300  | 0.53436700  | 4.33927500  |
| C | 4.38246200  | 0.67150500  | 4.01534700  |
| C | 3.93417400  | 0.63434700  | 2.68103000  |
| O | 6.12135500  | 0.59186700  | 5.63935600  |
| O | 7.98683500  | 0.26433200  | 3.67681300  |
| O | 7.67126100  | -2.53148700 | -0.74562300 |
| C | 6.22798600  | -0.00017400 | -2.71984000 |
| O | 6.46027700  | 1.87666000  | -0.48776700 |
| O | 7.07069400  | 0.15441600  | 0.95300800  |
| H | 4.17047000  | 0.94336200  | -0.37131900 |
| O | 8.28593500  | -0.06484800 | -1.50955200 |
| C | -6.00571200 | 1.10248100  | 1.68300000  |
| O | -5.26445100 | 1.78846200  | 0.98168900  |
| C | -7.48723600 | 1.32713100  | 1.76702200  |
| C | 6.52637400  | -1.00200000 | -3.82842000 |
| C | 6.64743400  | -0.45760000 | -5.22868300 |
| O | 6.62271200  | -2.19297600 | -3.57694900 |
| H | -2.55503600 | -2.63740800 | 3.29294500  |
| H | -2.46918100 | -4.27547400 | -3.50126100 |
| H | -4.97079300 | -6.64601800 | -2.65997900 |
| H | -6.52045900 | -5.30033000 | -0.26353400 |
| H | -5.75410600 | 0.15134400  | 3.58882400  |
| H | -4.30102200 | 0.23680100  | 2.57544200  |
| H | -6.01172400 | -0.99417400 | -1.00755100 |
| H | -6.92901500 | -2.34262300 | 3.27119400  |
| H | 0.93047200  | -0.04940200 | -2.76908700 |
| H | 0.48206700  | -1.75824800 | -0.98244700 |
| H | 0.86771300  | -0.92548000 | 1.36862200  |
| H | 0.16614700  | 1.56715800  | 1.72413700  |
| H | 1.39752700  | 2.90040100  | -0.20033200 |
| H | -1.56089300 | 1.19461700  | -1.72130900 |
| H | -1.24444700 | 0.42520800  | -3.29276200 |
| H | -1.17746800 | 6.45129100  | -1.70996800 |
| H | -3.13297600 | 2.94570100  | -0.10191500 |
| H | -4.32923900 | 8.05191500  | -2.17290500 |
| H | -6.37571700 | 5.88181800  | -1.12060600 |
| H | -5.54967200 | 3.16823000  | 0.07310500  |
| H | 4.99669900  | -3.17745400 | -0.76647900 |
| H | 3.66285900  | 0.82562200  | 4.80986900  |
| H | 7.08578700  | 0.49182600  | 5.67400100  |
| H | 8.54005700  | 0.19172500  | 2.88420400  |
| H | 5.13641600  | 0.02518700  | -2.61611000 |
| H | 6.53346100  | 1.00893800  | -3.00611700 |
| H | 7.39324500  | 2.01656400  | -0.72432200 |
| H | 8.74607100  | -0.83420400 | -1.12399500 |
| H | -8.01246300 | 0.37010800  | 1.79126500  |
| H | -7.70506500 | 1.83968200  | 2.71248800  |
| H | -7.83401200 | 1.94630900  | 0.93888500  |
| H | 6.71007300  | -1.27283700 | -5.95019200 |
| H | 5.79639800  | 0.19090200  | -5.46330200 |
| H | 7.54766300  | 0.16485500  | -5.29602400 |



Cartesian coordinates of the low-energy conformer of acetyl amariin [**1a** (<sup>13</sup>C<sub>4</sub>)-**3**] at the B3LYP/6-31G(d,p) level in acetone (PCM).

|   |             |             |             |
|---|-------------|-------------|-------------|
| C | 1.34799500  | 1.48012800  | 1.31416100  |
| O | 0.61050400  | 2.37869900  | 1.65240500  |
| C | 1.72938300  | 2.19718100  | -2.17689600 |
| O | 0.91435700  | 2.63484800  | -2.97010100 |
| C | 2.83521200  | 1.49212400  | 1.51930600  |
| C | 3.25422000  | 1.79744800  | 2.76437000  |
| C | 4.67378100  | 1.73247500  | 3.12957900  |
| C | 5.55142600  | 0.86528100  | 2.21944200  |
| C | 5.25942100  | 1.31461100  | 0.77359800  |
| C | 3.76921100  | 1.27135400  | 0.33400700  |
| C | 3.70320000  | 2.51003500  | -0.56797900 |
| C | 4.77261300  | 3.31315600  | -0.18398400 |
| C | 5.01229300  | 4.57585900  | -0.70893400 |
| C | 4.10702900  | 5.06154000  | -1.67044000 |
| C | 3.04417100  | 4.26731400  | -2.09232800 |
| C | 2.82740100  | 2.98283200  | -1.56128000 |
| O | 4.28844700  | 6.29222600  | -2.21755800 |
| O | 6.05625100  | 5.37403500  | -0.36037000 |
| O | 5.16473600  | 2.27402400  | 4.11001200  |
| C | 5.20132800  | -0.63865200 | 2.47591700  |
| O | 6.01554700  | 0.64009000  | -0.16930700 |
| O | 5.59637600  | 2.74141900  | 0.75059700  |
| H | 3.54503900  | 0.34325800  | -0.19075800 |
| O | 6.91217400  | 1.10079400  | 2.50154500  |
| C | -0.59667200 | -0.09026400 | -1.94019200 |
| C | -0.97609200 | 0.75668300  | -0.71967900 |
| C | -0.49703900 | 0.17128500  | 0.62163000  |
| C | -0.84422600 | -1.31980600 | 0.72979500  |
| C | -0.64095700 | -2.12233600 | -0.56106700 |
| O | -1.00876700 | -1.45841500 | -1.73972500 |
| O | -2.42367200 | 0.67397200  | -0.71943800 |
| O | -2.25648400 | -1.40507800 | 1.02428000  |
| C | 0.86403100  | -0.00950400 | -2.46569700 |
| O | 0.93025800  | 0.31171300  | 0.77236200  |
| O | 0.74115700  | -2.51632900 | -0.60892600 |
| C | 0.99282600  | -3.76251700 | -1.13833500 |
| O | 0.10755200  | -4.56931100 | -1.35136100 |
| C | 2.42363300  | -3.98137600 | -1.43106400 |
| C | 2.77372500  | -5.20390000 | -2.02862700 |
| C | 4.09164400  | -5.44516900 | -2.39551400 |
| C | 5.06134500  | -4.45773400 | -2.16403100 |
| C | 4.71605700  | -3.23992700 | -1.56002200 |
| C | 3.39629300  | -2.99532200 | -1.19144300 |
| O | 4.43863700  | -6.63025600 | -2.97280500 |
| O | 6.34193300  | -4.71635900 | -2.53548800 |
| O | 5.74347900  | -2.33929500 | -1.44471100 |
| O | 1.74112600  | 0.90415400  | -1.77751700 |
| C | -3.15816200 | 1.52559800  | 0.02428300  |
| O | -2.72266700 | 2.49099500  | 0.61239100  |
| C | -2.60402200 | -1.24315700 | 2.33064100  |
| O | -1.78023300 | -1.21347100 | 3.22631300  |
| C | -4.60127100 | 1.12253800  | -0.07069400 |
| C | -5.49112700 | 2.10334800  | -0.31269700 |
| C | -6.89091800 | 1.78052000  | -0.65359500 |
| C | -7.07230900 | 0.41538600  | -1.33365800 |
| C | -6.45676400 | -0.60852100 | -0.34681500 |
| C | -4.97604000 | -0.35606200 | 0.06519900  |
| C | -5.01493200 | -0.78441700 | 1.54256600  |
| C | -6.35743000 | -0.75605900 | 1.91137100  |
| C | -6.81825700 | -1.02467900 | 3.19308200  |

|   |             |             |             |
|---|-------------|-------------|-------------|
| C | -5.86218600 | -1.32663800 | 4.17789200  |
| C | -4.51392900 | -1.37450200 | 3.84043100  |
| C | -4.06785100 | -1.12115400 | 2.52864300  |
| O | -6.25211100 | -1.59646400 | 5.45199700  |
| O | -8.12780900 | -1.01492200 | 3.55892000  |
| O | -7.85865700 | 2.46618500  | -0.36418600 |
| C | -6.39606700 | 0.28782200  | -2.71278900 |
| O | -6.57809200 | -1.91205300 | -0.80365300 |
| O | -7.21830400 | -0.45277600 | 0.89109200  |
| H | -4.30828300 | -0.97361600 | -0.53606400 |
| O | -8.44563300 | 0.13987700  | -1.49718700 |
| C | 6.38080400  | -1.57727000 | 2.21918600  |
| O | 6.57992800  | -2.06870300 | 1.11586100  |
| C | 7.26408500  | -1.90726100 | 3.39073100  |
| C | -6.71324400 | 1.44342900  | -3.65305300 |
| C | -6.83518900 | 1.11810600  | -5.11983200 |
| O | -6.82387100 | 2.58030000  | -3.22169800 |
| H | 2.54968900  | 2.08497400  | 3.53797600  |
| H | 2.38256700  | 4.63851000  | -2.86533300 |
| H | 5.08320700  | 6.68913800  | -1.82734300 |
| H | 6.63783100  | 4.90548800  | 0.25734600  |
| H | 4.90062300  | -0.74816200 | 3.52214200  |
| H | 4.36367100  | -0.95342000 | 1.85069100  |
| H | 6.94123900  | 0.66936700  | 0.12398300  |
| H | 6.92448400  | 1.72195100  | 3.25479300  |
| H | -1.25514500 | 0.24531000  | -2.74360900 |
| H | -0.66708000 | 1.79698900  | -0.82708800 |
| H | -0.97604000 | 0.71779000  | 1.43405400  |
| H | -0.27221700 | -1.77488600 | 1.53861600  |
| H | -1.25762300 | -3.01971800 | -0.52942300 |
| H | 1.33799500  | -0.97994000 | -2.35074400 |
| H | 0.84448600  | 0.26531900  | -3.52052100 |
| H | 2.01532800  | -5.95436100 | -2.21550100 |
| H | 3.12378700  | -2.05207100 | -0.73615600 |
| H | 5.39069900  | -6.60937100 | -3.15716100 |
| H | 6.86614500  | -3.93694800 | -2.27620400 |
| H | 5.85062500  | -2.03509500 | -0.51546000 |
| H | -5.19106300 | 3.14629200  | -0.30263400 |
| H | -3.78960800 | -1.62764100 | 4.60461400  |
| H | -7.21909300 | -1.53173400 | 5.49796800  |
| H | -8.68382900 | -0.84727000 | 2.78288200  |
| H | -5.30345800 | 0.25808500  | -2.62156900 |
| H | -6.69464800 | -0.66841700 | -3.14851000 |
| H | -7.50918800 | -2.03275900 | -1.05717100 |
| H | -8.91281000 | 0.83466600  | -0.99589400 |
| H | 7.61594400  | -0.98121700 | 3.85413600  |
| H | 6.67943600  | -2.44626700 | 4.14571000  |
| H | 8.10647000  | -2.52141900 | 3.07137500  |
| H | -5.98097700 | 0.51891400  | -5.45313500 |
| H | -7.73159800 | 0.50686400  | -5.27852300 |
| H | -6.90657700 | 2.03322700  | -5.70854700 |

Cartesian coordinates of the low-energy conformer of acetonyl amariin [**1a** ( $^{13}\text{C}_4$ )-**4**] at the B3LYP/6-31G(d,p) level in acetone (PCM).

|   |             |             |             |
|---|-------------|-------------|-------------|
| C | -1.34286000 | 0.35293100  | -1.84655000 |
| O | -0.66982000 | 0.38546600  | -2.85291700 |
| C | -1.49168000 | 3.23751200  | 0.50335800  |
| O | -0.58658200 | 4.05542200  | 0.54135900  |
| C | -2.84210400 | 0.28726300  | -1.82053800 |
| C | -3.42006600 | -0.27249500 | -2.90348300 |
| C | -4.86371600 | -0.55976100 | -2.95525700 |
| C | -5.54440400 | -0.70422700 | -1.59050300 |
| C | -5.14249100 | 0.57307800  | -0.80361000 |
| C | -3.62291500 | 0.84255100  | -0.63170700 |
| C | -3.60422300 | 2.37543600  | -0.70572400 |
| C | -4.76650800 | 2.73155100  | -1.38666000 |
| C | -5.07753400 | 4.03087100  | -1.76061600 |
| C | -4.14659800 | 5.03482300  | -1.44092700 |
| C | -2.98979500 | 4.71249000  | -0.73710900 |
| C | -2.70415100 | 3.39121100  | -0.34277000 |
| O | -4.38974900 | 6.32737700  | -1.78381300 |
| O | -6.21230600 | 4.40041100  | -2.41315900 |
| O | -5.50046600 | -0.67816900 | -3.99201200 |
| C | -5.12156100 | -1.96383100 | -0.80110100 |
| O | -5.75935000 | 0.63760600  | 0.43212400  |
| O | -5.60637200 | 1.67964200  | -1.64716900 |
| H | -3.25511000 | 0.44339600  | 0.31407100  |
| O | -6.95148800 | -0.72673100 | -1.71979000 |
| C | 0.88047800  | 1.37010700  | 1.79811500  |
| C | 1.19347800  | 1.30884600  | 0.29602400  |
| C | 0.57285500  | 0.10295700  | -0.43676100 |
| C | 0.79599700  | -1.19851200 | 0.34636000  |
| C | 0.54879400  | -1.05215800 | 1.85431100  |
| O | 1.11299900  | 0.08514900  | 2.41753600  |
| O | 2.62924100  | 1.10402200  | 0.28697800  |
| O | 2.18243600  | -1.57499000 | 0.19547700  |
| C | -0.44781500 | 2.02746900  | 2.25176300  |
| O | -0.84590000 | 0.27966000  | -0.58928600 |
| O | -0.87161500 | -1.01012400 | 2.12884400  |
| C | -1.54826700 | -2.19102000 | 2.12873500  |
| O | -1.05027600 | -3.22947100 | 1.72633800  |
| C | -2.92839800 | -2.04965600 | 2.64256100  |
| C | -3.85668700 | -3.04524600 | 2.29940100  |
| C | -5.17415500 | -2.92634400 | 2.73106400  |
| C | -5.54895100 | -1.85325400 | 3.55229100  |
| C | -4.61186700 | -0.87844800 | 3.92419100  |
| C | -3.30526600 | -0.96636400 | 3.45259400  |
| O | -6.17931100 | -3.79868800 | 2.40508000  |
| O | -6.82878100 | -1.71275700 | 3.98935900  |
| O | -4.98106900 | 0.16462200  | 4.71963000  |
| O | -1.50740100 | 2.12763900  | 1.27655000  |
| C | 3.33625100  | 1.25027500  | -0.85059900 |
| O | 2.89603000  | 1.68421600  | -1.89327600 |
| C | 2.47906700  | -2.28584400 | -0.92816300 |
| O | 1.61875100  | -2.73452100 | -1.66288700 |
| C | 4.75994000  | 0.86474700  | -0.57415100 |
| C | 5.71728000  | 1.68860700  | -1.03965700 |
| C | 7.11817700  | 1.53335100  | -0.59829000 |
| C | 7.26775100  | 0.91708700  | 0.80161400  |
| C | 6.52974400  | -0.44411800 | 0.72101600  |
| C | 5.04312500  | -0.38885100 | 0.25829000  |
| C | 4.96275700  | -1.66111900 | -0.60326400 |
| C | 6.27901600  | -1.99778100 | -0.90894500 |
| C | 6.64213700  | -3.06365100 | -1.72072800 |

|   |             |             |             |
|---|-------------|-------------|-------------|
| C | 5.60983700  | -3.83540200 | -2.28012900 |
| C | 4.28434600  | -3.52977400 | -1.99065000 |
| C | 3.93622000  | -2.45787300 | -1.14549400 |
| O | 5.90177300  | -4.89191600 | -3.08449600 |
| O | 7.92503600  | -3.40877600 | -2.01099300 |
| O | 8.10117900  | 1.77916100  | -1.27897600 |
| C | 6.67885700  | 1.76674600  | 1.94411800  |
| O | 6.60013600  | -1.14768100 | 1.91433300  |
| O | 7.21998600  | -1.19177800 | -0.32658600 |
| H | 4.38111700  | -0.42602000 | 1.12377500  |
| O | 8.63122400  | 0.69539800  | 1.08401100  |
| C | -5.78100400 | -3.28005300 | -1.20460600 |
| O | -6.15786500 | -4.05713100 | -0.33250900 |
| C | -5.89400400 | -3.65508900 | -2.65636400 |
| C | 7.10443000  | 3.22845000  | 1.89597000  |
| C | 7.30300700  | 3.92747000  | 3.21637600  |
| O | 7.23799700  | 3.79922500  | 0.82474200  |
| H | -2.82157800 | -0.54108600 | -3.76789400 |
| H | -2.30489000 | 5.50526800  | -0.46330600 |
| H | -5.24192400 | 6.36853600  | -2.24585400 |
| H | -6.79073800 | 3.63164400  | -2.52920200 |
| H | -4.03751900 | -2.11331400 | -0.87045200 |
| H | -5.35302000 | -1.79212200 | 0.25045100  |
| H | -6.70279500 | 0.45180100  | 0.28242100  |
| H | -7.15871700 | -0.41159500 | -2.61677600 |
| H | 1.67384000  | 1.97961400  | 2.23638800  |
| H | 0.94813900  | 2.24640600  | -0.20442400 |
| H | 1.01637700  | 0.02148900  | -1.42924700 |
| H | 0.16240500  | -1.98864900 | -0.05254200 |
| H | 0.98406300  | -1.90961500 | 2.37144100  |
| H | -0.85849200 | 1.43172500  | 3.06415300  |
| H | -0.22827200 | 3.03370500  | 2.60810000  |
| H | -3.55462700 | -3.88092600 | 1.67895000  |
| H | -2.59208500 | -0.20211100 | 3.73286500  |
| H | -6.15637300 | -3.96080600 | 1.43220800  |
| H | -7.34445200 | -2.43288400 | 3.58538300  |
| H | -5.92257600 | 0.06606400  | 4.93111900  |
| H | 5.47409600  | 2.51122800  | -1.70447600 |
| H | 3.49940100  | -4.14195500 | -2.41690100 |
| H | 6.86628800  | -4.96037100 | -3.16432600 |
| H | 8.53670600  | -2.83195200 | -1.52872400 |
| H | 5.58256200  | 1.76544400  | 1.91662000  |
| H | 6.96296300  | 1.30352400  | 2.89175900  |
| H | 7.53725000  | -1.16297700 | 2.17370300  |
| H | 9.10105800  | 0.85285500  | 0.24338200  |
| H | -6.33050800 | -4.65000500 | -2.74459400 |
| H | -6.51123700 | -2.92469100 | -3.18629400 |
| H | -4.90523900 | -3.64253900 | -3.12824600 |
| H | 6.44749000  | 3.75103300  | 3.87712800  |
| H | 8.18204800  | 3.50447200  | 3.71707700  |
| H | 7.44770200  | 4.99740600  | 3.06353200  |

Cartesian coordinates of the low-energy conformer of acetonyl amariin [**1a** (<sup>0,3</sup>B)-1] at the B3LYP/6-31G(d,p) level in acetone (PCM).

|   |             |             |             |
|---|-------------|-------------|-------------|
| C | -2.01068600 | -1.40417400 | 1.46833200  |
| O | -1.52728300 | -1.60861800 | 2.55947300  |
| C | -1.92308000 | -3.58852900 | -1.63132700 |
| O | -1.00750200 | -4.38390700 | -1.75710400 |
| C | -3.47174800 | -1.18197100 | 1.19744400  |
| C | -4.18872800 | -0.72961900 | 2.24723600  |
| C | -5.58015400 | -0.28288800 | 2.10476500  |
| C | -6.02240800 | 0.05991500  | 0.68091900  |
| C | -5.57076600 | -1.11632100 | -0.21160200 |
| C | -4.05465500 | -1.43443600 | -0.19409100 |
| C | -4.10216400 | -2.94089000 | -0.44695600 |
| C | -5.35295400 | -3.35654300 | 0.00432300  |
| C | -5.74412700 | -4.68671500 | 0.04678000  |
| C | -4.81104900 | -5.64912400 | -0.38487600 |
| C | -3.57204400 | -5.25291100 | -0.88377900 |
| C | -3.20489200 | -3.89576600 | -0.94400500 |
| O | -5.13629100 | -6.96893600 | -0.36176400 |
| O | -6.95955400 | -5.12973800 | 0.46835200  |
| O | -6.36112400 | -0.15891900 | 3.03938400  |
| C | -5.36761800 | 1.36103800  | 0.14834400  |
| O | -5.99086500 | -0.95609300 | -1.52045700 |
| O | -6.18230400 | -2.32151300 | 0.36423700  |
| H | -3.51437600 | -0.87962800 | -0.96061500 |
| O | -7.42462500 | 0.18149900  | 0.60822900  |
| C | 0.22407900  | -1.07291900 | -2.10991600 |
| C | 0.74872000  | -1.72534100 | -0.80658500 |
| C | 0.12263900  | -1.06294400 | 0.42823200  |
| C | 0.41961300  | 0.45061800  | 0.42635300  |
| C | 0.31548300  | 1.03450800  | -0.99773600 |
| O | -0.42369700 | 0.17776700  | -1.84722400 |
| O | 2.17267900  | -1.43953800 | -0.77413400 |
| O | 1.77068700  | 0.66514400  | 0.87225700  |
| C | -0.74194500 | -1.94115500 | -2.90724500 |
| O | -1.30116800 | -1.23793500 | 0.33038100  |
| O | -0.41085200 | 2.24142300  | -0.90575600 |
| C | -0.11057900 | 3.23319000  | -1.81027600 |
| O | 0.74794400  | 3.09898800  | -2.66083500 |
| C | -0.92681100 | 4.44580300  | -1.59469900 |
| C | -0.63030300 | 5.56782900  | -2.38366100 |
| C | -1.35534200 | 6.74200500  | -2.21068800 |
| C | -2.37715300 | 6.79145300  | -1.25303100 |
| C | -2.67823300 | 5.66712700  | -0.46889600 |
| C | -1.95187800 | 4.49005900  | -0.63287400 |
| O | -1.07585400 | 7.83851500  | -2.97243200 |
| O | -3.06677900 | 7.95905700  | -1.12027500 |
| O | -3.68920000 | 5.85668000  | 0.42572300  |
| O | -1.90858500 | -2.34196600 | -2.16010200 |
| C | 2.93803000  | -2.09853100 | 0.12411900  |
| O | 2.54961400  | -3.01332800 | 0.81736100  |
| C | 1.98321200  | 0.71373600  | 2.21632700  |
| O | 1.07522100  | 0.76892300  | 3.02349700  |
| C | 4.34371000  | -1.57374300 | 0.07537700  |
| C | 5.32218500  | -2.48466400 | -0.08465800 |
| C | 6.71382700  | -2.06138800 | -0.33398200 |
| C | 6.84566300  | -0.69068900 | -1.01214100 |
| C | 6.07849500  | 0.28956000  | -0.08979000 |
| C | 4.59159300  | -0.06837000 | 0.20331300  |
| C | 4.47469800  | 0.38819100  | 1.66786300  |
| C | 5.77938600  | 0.46313500  | 2.14735500  |
| C | 6.10806700  | 0.79963300  | 3.45357600  |

|   |             |             |             |
|---|-------------|-------------|-------------|
| C | 5.05211200  | 1.06875800  | 4.34184800  |
| C | 3.73782900  | 1.02050200  | 3.88909000  |
| C | 3.42548400  | 0.69317300  | 2.55595600  |
| O | 5.31188600  | 1.40258700  | 5.63385400  |
| O | 7.37869500  | 0.88926000  | 3.92885700  |
| O | 7.70533900  | -2.67507300 | 0.02803900  |
| C | 6.27159100  | -0.62379300 | -2.44106600 |
| O | 6.13993300  | 1.59564000  | -0.55170900 |
| O | 6.74232900  | 0.19991500  | 1.20941400  |
| H | 3.93464100  | 0.48804600  | -0.46533300 |
| O | 8.20274500  | -0.31205300 | -1.07095100 |
| C | -5.50481900 | 2.63611100  | 0.96796900  |
| O | -4.50309800 | 3.33008400  | 1.11666000  |
| C | -6.84275000 | 3.04612000  | 1.51697200  |
| C | 6.75754400  | -1.75135200 | -3.34334400 |
| C | 6.99364300  | -1.41371300 | -4.79314200 |
| O | 6.90852400  | -2.87826300 | -2.89844500 |
| H | -3.73741400 | -0.66383500 | 3.23172400  |
| H | -2.89311900 | -6.00676800 | -1.26333500 |
| H | -6.03757500 | -7.05776900 | -0.01340500 |
| H | -7.53057000 | -4.37584100 | 0.67918100  |
| H | -4.30078400 | 1.22122700  | -0.02780800 |
| H | -5.83707200 | 1.55412300  | -0.82441400 |
| H | -6.94128200 | -0.75217600 | -1.48573100 |
| H | -7.77284200 | -0.07305200 | 1.48134800  |
| H | 1.09579500  | -0.90500300 | -2.75957100 |
| H | 0.59911900  | -2.80524600 | -0.79714000 |
| H | 0.48411700  | -1.52034800 | 1.34882100  |
| H | -0.27346200 | 0.95785600  | 1.09830200  |
| H | 1.31042900  | 1.22576500  | -1.41397400 |
| H | -1.12053000 | -1.36226800 | -3.75087500 |
| H | -0.21874300 | -2.82726100 | -3.26978800 |
| H | 0.16072300  | 5.52428300  | -3.12226400 |
| H | -2.19281200 | 3.62350700  | -0.03143200 |
| H | -1.68654100 | 8.54705100  | -2.71571500 |
| H | -3.75919000 | 7.82031700  | -0.45318900 |
| H | -3.98846400 | 5.00504700  | 0.80710600  |
| H | 5.10814900  | -3.54842200 | -0.06238400 |
| H | 2.93417800  | 1.25289000  | 4.57683200  |
| H | 6.27321500  | 1.40316500  | 5.76481500  |
| H | 8.00921400  | 0.73878100  | 3.20813900  |
| H | 5.17677800  | -0.68717100 | -2.43357800 |
| H | 6.52156400  | 0.35340900  | -2.86028800 |
| H | 7.07747600  | 1.78477200  | -0.72790600 |
| H | 8.68122600  | -0.97083400 | -0.53304100 |
| H | -7.14800600 | 2.33929100  | 2.29611300  |
| H | -6.77877400 | 4.05005400  | 1.93781000  |
| H | -7.60837000 | 2.99942200  | 0.73785800  |
| H | 7.85282900  | -0.73646800 | -4.86792600 |
| H | 7.18885800  | -2.31894000 | -5.36896400 |
| H | 6.13279000  | -0.87863300 | -5.20839100 |

Cartesian coordinates of the low-energy conformer of acetonyl amariin [**1a** (<sup>0,3</sup>B)-2] at the B3LYP/6-31G(d,p) level in acetone (PCM).

|   |             |             |             |
|---|-------------|-------------|-------------|
| C | -2.01083100 | -1.40486600 | 1.46816100  |
| O | -1.52735500 | -1.61011900 | 2.55912000  |
| C | -1.92386600 | -3.58796700 | -1.63226900 |
| O | -1.00845600 | -4.38349100 | -1.75824900 |
| C | -3.47187200 | -1.18228700 | 1.19753700  |
| C | -4.18873000 | -0.73038400 | 2.24761300  |
| C | -5.58003500 | -0.28319300 | 2.10539100  |
| C | -6.02208900 | 0.06061600  | 0.68171800  |
| C | -5.57086600 | -1.11530600 | -0.21142500 |
| C | -4.05486700 | -1.43390200 | -0.19410900 |
| C | -4.10281300 | -2.94021400 | -0.44765200 |
| C | -5.35371500 | -3.35570800 | 0.00347800  |
| C | -5.74522200 | -4.68580300 | 0.04538800  |
| C | -4.81241000 | -5.64827300 | -0.38667100 |
| C | -3.57329500 | -5.25219000 | -0.88541800 |
| C | -3.20579600 | -3.89512200 | -0.94511300 |
| O | -5.13800000 | -6.96801000 | -0.36411200 |
| O | -6.96076800 | -5.12868700 | 0.46677900  |
| O | -6.36098600 | -0.15950600 | 3.04005700  |
| C | -5.36673300 | 1.36173100  | 0.14998600  |
| O | -5.99099400 | -0.95434500 | -1.52016600 |
| O | -6.18276300 | -2.32063300 | 0.36388900  |
| H | -3.51443500 | -0.87889500 | -0.96038300 |
| O | -7.42426900 | 0.18275700  | 0.60898700  |
| C | 0.22377800  | -1.07259700 | -2.11018000 |
| C | 0.74836000  | -1.72534400 | -0.80698600 |
| C | 0.12239500  | -1.06315000 | 0.42799100  |
| C | 0.41952400  | 0.45041700  | 0.42642800  |
| C | 0.31567200  | 1.03456700  | -0.99757100 |
| O | -0.42380100 | 0.17812900  | -1.84717700 |
| O | 2.17235800  | -1.43964500 | -0.77447600 |
| O | 1.77054300  | 0.66467200  | 0.87254600  |
| C | -0.74235800 | -1.94050100 | -2.90772300 |
| O | -1.30143600 | -1.23803000 | 0.33022900  |
| O | -0.41019000 | 2.24174300  | -0.90557500 |
| C | -0.10933100 | 3.23354500  | -1.80985700 |
| O | 0.74956900  | 3.09930600  | -2.66002900 |
| C | -0.92537100 | 4.44632700  | -1.59447300 |
| C | -0.62799300 | 5.56847400  | -2.38291400 |
| C | -1.35287400 | 6.74278800  | -2.21017200 |
| C | -2.37541400 | 6.79222800  | -1.25331200 |
| C | -2.67739100 | 5.66776100  | -0.46971200 |
| C | -1.95120200 | 4.49055100  | -0.63344900 |
| O | -1.07247100 | 7.83944800  | -2.97136400 |
| O | -3.06484900 | 7.95997700  | -1.12076700 |
| O | -3.68910500 | 5.85732500  | 0.42402200  |
| O | -1.90911500 | -2.34126600 | -2.16074300 |
| C | 2.93768400  | -2.09893500 | 0.12358700  |
| O | 2.54926800  | -3.01393200 | 0.81655400  |
| C | 1.98294900  | 0.71281700  | 2.21663600  |
| O | 1.07487600  | 0.76787000  | 3.02373100  |
| C | 4.34337900  | -1.57418600 | 0.07496200  |
| C | 5.32176800  | -2.48511500 | -0.08556600 |
| C | 6.71347700  | -2.06189300 | -0.33466700 |
| C | 6.84544500  | -0.69085800 | -1.01208000 |
| C | 6.07834700  | 0.28897900  | -0.08922200 |
| C | 4.59139100  | -0.06888800 | 0.20360700  |
| C | 4.47443400  | 0.38697100  | 1.66835400  |
| C | 5.77909800  | 0.46141400  | 2.14801400  |
| C | 6.10767400  | 0.79730600  | 3.45442400  |

|   |             |             |             |
|---|-------------|-------------|-------------|
| C | 5.05168100  | 1.06629600  | 4.34267500  |
| C | 3.73743300  | 1.01850600  | 3.88975100  |
| C | 3.42517900  | 0.69182700  | 2.55644600  |
| O | 5.31137300  | 1.39955000  | 5.63484500  |
| O | 7.37826900  | 0.88649500  | 3.92988800  |
| O | 7.70486200  | -2.67588500 | 0.02712900  |
| C | 6.27146000  | -0.62303700 | -2.44096700 |
| O | 6.14012300  | 1.59529400  | -0.55032500 |
| O | 6.74208100  | 0.19842800  | 1.21007400  |
| H | 3.93453100  | 0.48790300  | -0.46482000 |
| O | 8.20256800  | -0.31227200 | -1.07070600 |
| C | -5.50372100 | 2.63664400  | 0.96991000  |
| O | -4.50211200 | 3.33099300  | 1.11765200  |
| C | -6.84127400 | 3.04617700  | 1.52015600  |
| C | 6.75678900  | -1.75037000 | -3.34382700 |
| C | 6.99168800  | -1.41232800 | -4.79377000 |
| O | 6.90824100  | -2.87737800 | -2.89937300 |
| H | -3.73737700 | -0.66525300 | 3.23212900  |
| H | -2.89457900 | -6.00608900 | -1.26526700 |
| H | -6.03921300 | -7.05676300 | -0.01554500 |
| H | -7.53144700 | -4.37473300 | 0.67831500  |
| H | -4.29989600 | 1.22164800  | -0.02595800 |
| H | -5.83577000 | 1.55552400  | -0.82284500 |
| H | -6.94133800 | -0.75010500 | -1.48529200 |
| H | -7.77262000 | -0.07209300 | 1.48196700  |
| H | 1.09551800  | -0.90464300 | -2.75979600 |
| H | 0.59867600  | -2.80524200 | -0.79777500 |
| H | 0.48387700  | -1.52075000 | 1.34848400  |
| H | -0.27362000 | 0.95758800  | 1.09836600  |
| H | 1.31071800  | 1.22544200  | -1.41374300 |
| H | -1.12078100 | -1.36138600 | -3.75127100 |
| H | -0.21929500 | -2.82663300 | -3.27040900 |
| H | 0.16358800  | 5.52494500  | -3.12092400 |
| H | -2.19279400 | 3.62391500  | -0.03239200 |
| H | -1.68313600 | 8.54808900  | -2.71488200 |
| H | -3.75749800 | 7.82140500  | -0.45389600 |
| H | -3.98761600 | 5.00590400  | 0.80648500  |
| H | 5.10760100  | -3.54886100 | -0.06375900 |
| H | 2.93375200  | 1.25079400  | 4.57749300  |
| H | 6.27269100  | 1.39987500  | 5.76590500  |
| H | 8.00883000  | 0.73634700  | 3.20913900  |
| H | 5.17660700  | -0.68574800 | -2.43359900 |
| H | 6.52196600  | 0.35423000  | -2.85974300 |
| H | 7.07770800  | 1.78421200  | -0.72656000 |
| H | 8.68096900  | -0.97091000 | -0.53257600 |
| H | -7.60756100 | 2.99925400  | 0.74171600  |
| H | -7.14562200 | 2.33920400  | 2.29952700  |
| H | -6.77723700 | 4.05010500  | 1.94100100  |
| H | 7.85150300  | -0.73595200 | -4.86922000 |
| H | 7.18545100  | -2.31752600 | -5.37013300 |
| H | 6.13094800  | -0.87624500 | -5.20793600 |



Cartesian coordinates of the low-energy conformer of acetonyl amariin [**1a** (<sup>0,3</sup>B)-**3**] at the B3LYP/6-31G(d,p) level in acetone (PCM).

|   |             |             |             |
|---|-------------|-------------|-------------|
| C | -2.05011300 | -1.42626500 | 1.44610300  |
| O | -1.57796400 | -1.65733200 | 2.53683300  |
| C | -1.96139700 | -3.56521400 | -1.68091800 |
| O | -1.05323700 | -4.36874700 | -1.80885200 |
| C | -3.50609200 | -1.18241000 | 1.16707600  |
| C | -4.22648300 | -0.73716100 | 2.21754000  |
| C | -5.61087700 | -0.27058700 | 2.06969500  |
| C | -6.03601200 | 0.09899700  | 0.64741500  |
| C | -5.59167200 | -1.06961400 | -0.25866000 |
| C | -4.07985200 | -1.40682100 | -0.23296000 |
| C | -4.14357100 | -2.90868200 | -0.50812300 |
| C | -5.40340300 | -3.31533500 | -0.07419500 |
| C | -5.81100800 | -4.64114500 | -0.05479700 |
| C | -4.88549200 | -5.60861300 | -0.49152100 |
| C | -3.63703600 | -5.22053400 | -0.97295000 |
| C | -3.25308500 | -3.86722300 | -1.01019500 |
| O | -5.22680800 | -6.92453800 | -0.49050600 |
| O | -7.03563900 | -5.07542300 | 0.34880600  |
| O | -6.39844300 | -0.15049100 | 2.99925800  |
| C | -5.35925600 | 1.39905900  | 0.14046500  |
| O | -5.99823700 | -0.88488800 | -1.56856600 |
| O | -6.22310600 | -2.27549000 | 0.29377200  |
| H | -3.52609200 | -0.84760400 | -0.98655300 |
| O | -7.43584400 | 0.23985500  | 0.56419000  |
| C | 0.21786100  | -1.06709300 | -2.10701800 |
| C | 0.72537400  | -1.74059300 | -0.80721300 |
| C | 0.09500900  | -1.08655100 | 0.42994800  |
| C | 0.40741700  | 0.42389000  | 0.44935400  |
| C | 0.32454100  | 1.02566100  | -0.96842500 |
| O | -0.41754900 | 0.18765400  | -1.83428500 |
| O | 2.15210900  | -1.46891200 | -0.76414800 |
| O | 1.75536000  | 0.61635700  | 0.91418800  |
| C | -0.75057100 | -1.91441100 | -2.92356000 |
| O | -1.32952900 | -1.24541400 | 0.31719400  |
| O | -0.38807700 | 2.23992700  | -0.86867800 |
| C | -0.06782500 | 3.23944800  | -1.75764900 |
| O | 0.79706100  | 3.10602600  | -2.60188000 |
| C | -0.87214500 | 4.45845900  | -1.53377000 |
| C | -0.55563800 | 5.58724300  | -2.30508700 |
| C | -1.26900900 | 6.76725900  | -2.12335200 |
| C | -2.29930700 | 6.81576500  | -1.17478100 |
| C | -2.62040600 | 5.68473500  | -0.40841000 |
| C | -1.90575800 | 4.50178600  | -0.58105400 |
| O | -0.96967700 | 7.87040600  | -2.86774800 |
| O | -2.97699100 | 7.98925200  | -1.03294600 |
| O | -3.63795000 | 5.87381400  | 0.47876100  |
| O | -1.92825900 | -2.31180700 | -2.19245700 |
| C | 2.90835000  | -2.12919000 | 0.14046600  |
| O | 2.51130500  | -3.03388700 | 0.84138500  |
| C | 1.94972500  | 0.64440900  | 2.26224800  |
| O | 1.03125500  | 0.71602200  | 3.05616200  |
| C | 4.31856500  | -1.61433000 | 0.08521600  |
| C | 5.28778600  | -2.52404500 | -0.13125500 |
| C | 6.67887900  | -2.13976100 | -0.46109200 |
| C | 6.84251800  | -0.69065400 | -0.95986600 |
| C | 6.06866900  | 0.22423100  | 0.00971700  |
| C | 4.57469800  | -0.11963900 | 0.26018200  |
| C | 4.44067400  | 0.27395300  | 1.74163200  |
| C | 5.73798200  | 0.27894400  | 2.24635100  |
| C | 6.05250500  | 0.54253300  | 3.57269900  |

|   |             |             |             |
|---|-------------|-------------|-------------|
| C | 4.98918800  | 0.80860500  | 4.45324000  |
| C | 3.68286500  | 0.82754400  | 3.97574900  |
| C | 3.38455200  | 0.57113500  | 2.62385400  |
| O | 5.23525500  | 1.07409100  | 5.76362500  |
| O | 7.31579600  | 0.56435200  | 4.07424600  |
| O | 7.60744100  | -2.92883400 | -0.43435900 |
| C | 6.27918800  | -0.55875800 | -2.40137800 |
| O | 6.16773900  | 1.55631100  | -0.36089400 |
| O | 6.70682900  | 0.02801000  | 1.31298900  |
| H | 3.93336200  | 0.46695400  | -0.39766900 |
| O | 8.17918000  | -0.24838300 | -0.90470800 |
| C | -5.48809400 | 2.66454000  | 0.97624600  |
| O | -4.48059300 | 3.34726900  | 1.13737800  |
| C | -6.82430700 | 3.08022400  | 1.52518500  |
| C | 7.13242400  | -1.22989700 | -3.47189900 |
| C | 6.43779600  | -1.60258600 | -4.75412700 |
| O | 8.33091400  | -1.43289700 | -3.30674300 |
| H | -3.78305600 | -0.69180100 | 3.20676000  |
| H | -2.96375100 | -5.97720300 | -1.35696500 |
| H | -6.13210800 | -7.00744000 | -0.15122100 |
| H | -7.60010400 | -4.31777100 | 0.56384300  |
| H | -4.29257900 | 1.24770500  | -0.02705500 |
| H | -5.81616900 | 1.61249600  | -0.83405100 |
| H | -6.94650100 | -0.67035700 | -1.53912200 |
| H | -7.79503400 | -0.02163900 | 1.43080900  |
| H | 1.09671000  | -0.90119900 | -2.74749300 |
| H | 0.56500500  | -2.81912500 | -0.81180900 |
| H | 0.44308900  | -1.55913600 | 1.34790500  |
| H | -0.28804100 | 0.93028500  | 1.11940900  |
| H | 1.32544800  | 1.20940200  | -1.37363600 |
| H | -1.11489900 | -1.32073800 | -3.76320000 |
| H | -0.23383900 | -2.80159500 | -3.29270500 |
| H | 0.24192400  | 5.54444000  | -3.03666900 |
| H | -2.16220200 | 3.63031200  | 0.00670500  |
| H | -1.57406500 | 8.58282900  | -2.60690900 |
| H | -3.67613100 | 7.85011600  | -0.37300400 |
| H | -3.94760000 | 5.02106600  | 0.84915300  |
| H | 5.05794000  | -3.58546000 | -0.14589800 |
| H | 2.87451500  | 1.05510300  | 4.65955700  |
| H | 6.19321100  | 1.03289500  | 5.91179600  |
| H | 7.95453900  | 0.42397900  | 3.35859200  |
| H | 5.25116600  | -0.92299700 | -2.47271200 |
| H | 6.24400400  | 0.50985800  | -2.65106600 |
| H | 7.10745000  | 1.70883800  | -0.56501400 |
| H | 8.62521800  | -0.68250400 | -1.66063300 |
| H | -7.58762700 | 3.04818500  | 0.74312600  |
| H | -7.13817300 | 2.36796100  | 2.29596300  |
| H | -6.75301200 | 4.07901000  | 1.95695300  |
| H | 5.74693300  | -2.43213900 | -4.56208500 |
| H | 5.83494400  | -0.76577800 | -5.12194600 |
| H | 7.16783100  | -1.90322100 | -5.50606500 |

Cartesian coordinates of the low-energy conformer of acetonil amariin [**1a** (<sup>0,3</sup>**B**)-4] at the B3LYP/6-31G(d,p) level in acetone (PCM).

|   |             |             |             |
|---|-------------|-------------|-------------|
| C | -1.78464900 | -1.88386600 | 1.33177500  |
| O | -1.16437800 | -2.60838500 | 2.07709700  |
| C | -2.05769300 | -2.95613900 | -2.15367900 |
| O | -1.18764200 | -3.73163600 | -2.51117400 |
| C | -3.27165200 | -1.67966700 | 1.36720200  |
| C | -3.84902800 | -1.80413600 | 2.58032200  |
| C | -5.24100600 | -1.39740900 | 2.81335800  |
| C | -5.82826500 | -0.42037400 | 1.78314200  |
| C | -5.52488000 | -1.01826500 | 0.39473400  |
| C | -4.03405200 | -1.33981300 | 0.08935200  |
| C | -4.18786800 | -2.62728000 | -0.73459300 |
| C | -5.43866700 | -3.14041500 | -0.40194500 |
| C | -5.91481400 | -4.36837800 | -0.83835500 |
| C | -5.06152100 | -5.14185600 | -1.64375700 |
| C | -3.81045700 | -4.64883500 | -2.00622900 |
| C | -3.36036000 | -3.38573600 | -1.57916400 |
| O | -5.46550700 | -6.35690700 | -2.09906300 |
| O | -7.13990900 | -4.87780500 | -0.53676300 |
| O | -5.91394700 | -1.73999400 | 3.77499400  |
| C | -5.17603400 | 0.97469800  | 2.00799500  |
| O | -6.03589900 | -0.24212100 | -0.63800100 |
| O | -6.18376800 | -2.32132800 | 0.40552400  |
| H | -3.55966900 | -0.52101200 | -0.45258200 |
| O | -7.22481400 | -0.34846700 | 1.94238600  |
| C | 0.21272100  | -0.45958000 | -2.09937800 |
| C | 0.74719500  | -1.36122100 | -0.96088200 |
| C | 0.20186500  | -0.91688300 | 0.40513100  |
| C | 0.53174600  | 0.56901300  | 0.66287400  |
| C | 0.42327000  | 1.40066800  | -0.62882400 |
| O | -0.38147100 | 0.73244600  | -1.58143600 |
| O | 2.18310500  | -1.13673700 | -0.92707700 |
| O | 1.90003100  | 0.66757800  | 1.10159200  |
| C | -0.81448900 | -1.11112600 | -3.01193400 |
| O | -1.22975700 | -1.06010600 | 0.41087800  |
| O | -0.25679600 | 2.60259300  | -0.34811900 |
| C | 0.11278700  | 3.71952300  | -1.06965300 |
| O | 1.18404000  | 3.80126200  | -1.63797300 |
| C | -0.93385000 | 4.75808900  | -1.05222400 |
| C | -0.59639900 | 6.04116800  | -1.50945400 |
| C | -1.57546200 | 7.02805400  | -1.56207700 |
| C | -2.89010200 | 6.72440400  | -1.18144300 |
| C | -3.22828200 | 5.43674400  | -0.73775500 |
| C | -2.24711800 | 4.45154000  | -0.65817200 |
| O | -1.26039000 | 8.28327500  | -1.99382000 |
| O | -3.82085500 | 7.71667800  | -1.26720800 |
| O | -4.54024900 | 5.26435100  | -0.42115400 |
| O | -1.96953600 | -1.61415100 | -2.30493300 |
| C | 2.94900800  | -1.99000800 | -0.21002800 |
| O | 2.54674100  | -3.01840900 | 0.28898500  |
| C | 2.15256300  | 0.39084700  | 2.40908300  |
| O | 1.26808500  | 0.25750800  | 3.23411200  |
| C | 4.37027800  | -1.50768400 | -0.19257500 |
| C | 5.31366200  | -2.40512800 | -0.53549800 |
| C | 6.71325700  | -1.98500600 | -0.74432400 |
| C | 6.87175300  | -0.52238200 | -1.18367200 |
| C | 6.16294500  | 0.30536700  | -0.08228400 |
| C | 4.67410100  | -0.05804700 | 0.19612500  |
| C | 4.61620500  | 0.12790400  | 1.72229400  |
| C | 5.93651800  | 0.08320100  | 2.16112900  |
| C | 6.31357600  | 0.15830900  | 3.49524100  |

|   |             |             |             |
|---|-------------|-------------|-------------|
| C | 5.29292700  | 0.27416800  | 4.45498100  |
| C | 3.96428700  | 0.33757200  | 4.04823500  |
| C | 3.60330000  | 0.27816100  | 2.68881900  |
| O | 5.60143600  | 0.35029300  | 5.77678600  |
| O | 7.59973300  | 0.12788300  | 3.93518400  |
| O | 7.69290800  | -2.67712800 | -0.51675500 |
| C | 6.26308000  | -0.19873100 | -2.56187500 |
| O | 6.25371000  | 1.66901500  | -0.31544500 |
| O | 6.86265800  | -0.02528500 | 1.15816100  |
| H | 4.01784200  | 0.62894100  | -0.33812100 |
| O | 8.23858900  | -0.17738000 | -1.22121900 |
| C | -5.60487000 | 2.11636600  | 1.09390400  |
| O | -4.74877300 | 2.67785000  | 0.41543400  |
| C | -7.02228700 | 2.61660600  | 1.14826800  |
| C | 6.68032400  | -1.18024200 | -3.65015500 |
| C | 6.89810000  | -0.61993600 | -5.03202400 |
| O | 6.79302100  | -2.36985000 | -3.39872600 |
| H | -3.27663200 | -2.16153900 | 3.42998300  |
| H | -3.18237100 | -5.24358200 | -2.65789600 |
| H | -6.35838700 | -6.53101600 | -1.76144600 |
| H | -7.64406500 | -4.23639500 | -0.01390700 |
| H | -5.43627800 | 1.26851600  | 3.03275500  |
| H | -4.08927500 | 0.90790500  | 1.94246000  |
| H | -6.99410100 | -0.17125100 | -0.49215800 |
| H | -7.42357100 | -0.84703200 | 2.75814100  |
| H | 1.07230100  | -0.19839800 | -2.73461500 |
| H | 0.55143200  | -2.41899800 | -1.14249500 |
| H | 0.61764700  | -1.53772100 | 1.19812500  |
| H | -0.13703500 | 0.95831300  | 1.43133900  |
| H | 1.41728300  | 1.61589600  | -1.03514000 |
| H | -1.19706400 | -0.35613400 | -3.70060400 |
| H | -0.34912700 | -1.92413900 | -3.56962200 |
| H | 0.41639000  | 6.26589700  | -1.82131500 |
| H | -2.50648400 | 3.45836400  | -0.31650400 |
| H | -2.06733200 | 8.82103400  | -1.97036100 |
| H | -4.67539300 | 7.34687900  | -0.99093600 |
| H | -4.71443700 | 4.32712100  | -0.17063800 |
| H | 5.06295100  | -3.44836400 | -0.69858500 |
| H | 3.18883700  | 0.44858800  | 4.79607400  |
| H | 6.56602300  | 0.30498100  | 5.87098800  |
| H | 8.20468600  | 0.09322300  | 3.17867300  |
| H | 5.16724900  | -0.22407500 | -2.52906700 |
| H | 6.54144500  | 0.82464600  | -2.82371100 |
| H | 7.19141300  | 1.85951200  | -0.48929100 |
| H | 8.70864000  | -0.92649800 | -0.80878700 |
| H | -7.73287500 | 1.79388500  | 1.23528800  |
| H | -7.12943600 | 3.22478500  | 2.05591400  |
| H | -7.23737700 | 3.24220700  | 0.28089600  |
| H | 6.04525400  | -0.00243700 | -5.33425000 |
| H | 7.77537200  | 0.03767500  | -5.01865000 |
| H | 7.05324200  | -1.42568400 | -5.75017400 |

Cartesian coordinates of the low-energy conformer of acetonyl amariin [**1a** (<sup>0,3</sup>B)-5] at the B3LYP/6-31G(d,p) level in acetone (PCM).

|   |             |             |             |
|---|-------------|-------------|-------------|
| C | -1.77735400 | -1.91174400 | 1.33935200  |
| O | -1.15578400 | -2.64168800 | 2.07790600  |
| C | -2.07532500 | -3.00120200 | -2.11979800 |
| O | -1.21079400 | -3.79254100 | -2.45375700 |
| C | -3.26281600 | -1.70010000 | 1.38251100  |
| C | -3.83540400 | -1.80674000 | 2.59780600  |
| C | -5.21696000 | -1.37390700 | 2.83178200  |
| C | -5.81817000 | -0.39466600 | 1.80305000  |
| C | -5.52145700 | -0.97624300 | 0.40724600  |
| C | -4.02770800 | -1.34779300 | 0.11334900  |
| C | -4.21092100 | -2.62355700 | -0.72110600 |
| C | -5.48082000 | -3.10114000 | -0.40649600 |
| C | -5.98219600 | -4.31738600 | -0.85110600 |
| C | -5.13728900 | -5.11391500 | -1.64155800 |
| C | -3.86812700 | -4.65368100 | -1.98850300 |
| C | -3.39216800 | -3.40332600 | -1.55654700 |
| O | -5.56493000 | -6.31834900 | -2.10163400 |
| O | -7.22512000 | -4.79235700 | -0.56805200 |
| O | -5.87575000 | -1.68440600 | 3.81428300  |
| C | -5.15794400 | 0.99629500  | 2.02565400  |
| O | -6.05262400 | -0.11228100 | -0.53843800 |
| O | -6.22142800 | -2.26021400 | 0.37837400  |
| H | -3.52774900 | -0.53741300 | -0.41990900 |
| O | -7.20635000 | -0.32851800 | 2.00354200  |
| C | 0.21460100  | -0.51420500 | -2.09898600 |
| C | 0.75252700  | -1.39763100 | -0.94790300 |
| C | 0.20532400  | -0.93629900 | 0.41150000  |
| C | 0.52769900  | 0.55475300  | 0.64838500  |
| C | 0.41693100  | 1.36719300  | -0.65536300 |
| O | -0.38534700 | 0.68245700  | -1.59841300 |
| O | 2.18743600  | -1.16728600 | -0.91702900 |
| O | 1.89503300  | 0.66582500  | 1.08687000  |
| C | -0.80860000 | -1.18254300 | -3.00347200 |
| O | -1.22544000 | -1.08457800 | 0.41947700  |
| O | -0.26478600 | 2.57258200  | -0.39233200 |
| C | 0.10278500  | 3.67667500  | -1.13440000 |
| O | 1.16143000  | 3.73670900  | -1.72877700 |
| C | -0.92682900 | 4.73215300  | -1.10504900 |
| C | -0.58015800 | 5.99848400  | -1.60080600 |
| C | -1.54054000 | 7.00393500  | -1.64253600 |
| C | -2.84681300 | 6.73514900  | -1.21132600 |
| C | -3.19517800 | 5.46472100  | -0.72696600 |
| C | -2.23171600 | 4.46079000  | -0.65962000 |
| O | -1.21552900 | 8.24287000  | -2.11235700 |
| O | -3.76094300 | 7.74336800  | -1.28780100 |
| O | -4.49840400 | 5.32991100  | -0.36124000 |
| O | -1.97164600 | -1.66278200 | -2.29342600 |
| C | 2.95628000  | -2.00853600 | -0.18866900 |
| O | 2.55757800  | -3.03250600 | 0.32211100  |
| C | 2.14735400  | 0.40737100  | 2.39827500  |
| O | 1.26242300  | 0.28147200  | 3.22398500  |
| C | 4.37543900  | -1.51998000 | -0.17489100 |
| C | 5.32298600  | -2.41861000 | -0.50296000 |
| C | 6.72139400  | -1.99610800 | -0.71519900 |
| C | 6.87470700  | -0.53949200 | -1.17598600 |
| C | 6.16086700  | 0.30141800  | -0.08778800 |
| C | 4.67298200  | -0.06375600 | 0.19395200  |
| C | 4.61251600  | 0.14369800  | 1.71739000  |
| C | 5.93243600  | 0.11039600  | 2.15833600  |
| C | 6.30791800  | 0.20609700  | 3.49158100  |

|   |             |             |             |
|---|-------------|-------------|-------------|
| C | 5.28592800  | 0.33149900  | 4.44863600  |
| C | 3.95749400  | 0.38395100  | 4.03962500  |
| C | 3.59813700  | 0.30396500  | 2.68082900  |
| O | 5.59267200  | 0.42773300  | 5.76951500  |
| O | 7.59386800  | 0.18733000  | 3.93269600  |
| O | 7.70335800  | -2.68058300 | -0.47493500 |
| C | 6.26685300  | -0.23864600 | -2.55963600 |
| O | 6.24667900  | 1.66184000  | -0.34066600 |
| O | 6.86028000  | -0.00849300 | 1.15820600  |
| H | 4.01477000  | 0.61310600  | -0.35073100 |
| O | 8.24018500  | -0.18959200 | -1.21648400 |
| C | -5.60507700 | 2.14707400  | 1.13132300  |
| O | -4.73917300 | 2.77768100  | 0.52939700  |
| C | -7.05041400 | 2.55495800  | 1.10134700  |
| C | 6.68554300  | -1.23666700 | -3.63214600 |
| C | 6.89726100  | -0.69895600 | -5.02391100 |
| O | 6.80388800  | -2.42142200 | -3.36110300 |
| H | -3.26606600 | -2.16345600 | 3.44979600  |
| H | -3.24813300 | -5.26522000 | -2.63240500 |
| H | -6.46645300 | -6.47041500 | -1.77638500 |
| H | -7.71852400 | -4.13651300 | -0.05259000 |
| H | -5.39472500 | 1.28428600  | 3.05789300  |
| H | -4.07194600 | 0.93326100  | 1.93918300  |
| H | -5.76571000 | -0.37309000 | -1.42704300 |
| H | -7.36171700 | -0.77161400 | 2.85998500  |
| H | 1.07354700  | -0.25858100 | -2.73734900 |
| H | 0.56015600  | -2.45858300 | -1.11454700 |
| H | 0.62342400  | -1.54437300 | 1.21316400  |
| H | -0.14373100 | 0.95137600  | 1.41078800  |
| H | 1.41035100  | 1.57838700  | -1.06488400 |
| H | -1.18258500 | -0.44232400 | -3.71269400 |
| H | -0.34330300 | -2.01058300 | -3.53876900 |
| H | 0.42585200  | 6.19570400  | -1.95068000 |
| H | -2.49888300 | 3.48139300  | -0.28563800 |
| H | -2.00934900 | 8.79869500  | -2.06973100 |
| H | -4.61149500 | 7.39638500  | -0.97209800 |
| H | -4.68665000 | 4.40361800  | -0.07975100 |
| H | 5.07652200  | -3.46500700 | -0.65157600 |
| H | 3.18083400  | 0.50266300  | 4.78502200  |
| H | 6.55733900  | 0.38798800  | 5.86538700  |
| H | 8.19932700  | 0.14505500  | 3.17695700  |
| H | 5.17100600  | -0.26451600 | -2.52735400 |
| H | 6.54413600  | 0.78075900  | -2.83774200 |
| H | 7.18393000  | 1.85341500  | -0.51577900 |
| H | 8.71246600  | -0.93010600 | -0.79126500 |
| H | -7.19580000 | 3.37066800  | 0.39207500  |
| H | -7.67707100 | 1.69830600  | 0.84796800  |
| H | -7.35306000 | 2.88088000  | 2.10318100  |
| H | 7.77326500  | -0.03950400 | -5.02452300 |
| H | 7.05174600  | -1.51627900 | -5.72901200 |
| H | 6.04216300  | -0.08828100 | -5.33349500 |

Cartesian coordinates of the low-energy conformer of acetonil amariin [**1a** (<sup>0,3</sup>B)-**6**] at the B3LYP/6-31G(d,p) level in acetone (PCM).

|   |             |             |             |
|---|-------------|-------------|-------------|
| C | -1.99046800 | -1.53807500 | 1.38931700  |
| O | -1.45897600 | -1.97872500 | 2.38450300  |
| C | -1.99604900 | -3.32520300 | -1.90895100 |
| O | -1.09555400 | -4.12519300 | -2.09935400 |
| C | -3.46592000 | -1.32615200 | 1.22001700  |
| C | -4.15757100 | -1.11902500 | 2.35861100  |
| C | -5.58185400 | -0.73865400 | 2.33100300  |
| C | -6.02615700 | -0.02432200 | 1.04946300  |
| C | -5.60828700 | -0.97554200 | -0.09715700 |
| C | -4.09908500 | -1.33448500 | -0.17433500 |
| C | -4.18719200 | -2.77769100 | -0.68265500 |
| C | -5.45541900 | -3.22772200 | -0.32454800 |
| C | -5.88495000 | -4.53565500 | -0.50029200 |
| C | -4.97211900 | -5.44723200 | -1.06057400 |
| C | -3.71023700 | -5.01528600 | -1.46114700 |
| C | -3.30530100 | -3.67659200 | -1.30129400 |
| O | -5.33324200 | -6.74440300 | -1.25192500 |
| O | -7.12144100 | -4.99853900 | -0.16915100 |
| O | -6.39356000 | -1.03160800 | 3.19548600  |
| C | -5.39897200 | 1.36922200  | 0.84573200  |
| O | -6.03351600 | -0.51794700 | -1.33270500 |
| O | -6.26228700 | -2.25580900 | 0.20636400  |
| H | -3.57036800 | -0.66578900 | -0.85373000 |
| O | -7.42959800 | 0.12392300  | 1.04189600  |
| C | 0.23179600  | -0.83347400 | -2.15706800 |
| C | 0.71250300  | -1.57399400 | -0.88480100 |
| C | 0.10491900  | -0.95035000 | 0.38079300  |
| C | 0.45436000  | 0.55169700  | 0.45581500  |
| C | 0.41236800  | 1.19843300  | -0.94192100 |
| O | -0.37014200 | 0.42259600  | -1.82703800 |
| O | 2.14684900  | -1.34552000 | -0.82254900 |
| O | 1.80246600  | 0.69430700  | 0.93936600  |
| C | -0.75795500 | -1.60838100 | -3.01483600 |
| O | -1.32511600 | -1.07520200 | 0.30289800  |
| O | -0.23463300 | 2.44675300  | -0.82293800 |
| C | 0.05486000  | 3.39051400  | -1.77846600 |
| O | 0.90126600  | 3.21701700  | -2.63362200 |
| C | -0.77108400 | 4.60553900  | -1.62425100 |
| C | -1.77569000 | 4.69761300  | -0.65010700 |
| C | -2.53794800 | 5.85833600  | -0.56051800 |
| C | -2.29662100 | 6.92481700  | -1.43659600 |
| C | -1.28855600 | 6.82669900  | -2.40741900 |
| C | -0.52559500 | 5.67059400  | -2.50703000 |
| O | -3.52152100 | 5.95439000  | 0.37980800  |
| O | -3.07228500 | 8.03596300  | -1.30555400 |
| O | -1.15468900 | 7.93437600  | -3.19813400 |
| O | -1.93632400 | -2.02891200 | -2.29691000 |
| C | 2.88035400  | -2.08975900 | 0.03473700  |
| O | 2.45485600  | -3.03581400 | 0.66082900  |
| C | 1.99260700  | 0.61876200  | 2.28483900  |
| O | 1.07201100  | 0.63386500  | 3.07977000  |
| C | 4.30327300  | -1.61040200 | 0.03230000  |
| C | 5.25336100  | -2.54182300 | -0.17467600 |
| C | 6.66095000  | -2.15052200 | -0.38439200 |
| C | 6.84417800  | -0.74411700 | -0.97205800 |
| C | 6.10069100  | 0.19909600  | 0.00628600  |
| C | 4.59890800  | -0.12495600 | 0.25846100  |
| C | 4.47783800  | 0.23919600  | 1.74813500  |
| C | 5.77744900  | 0.23328600  | 2.24686400  |
| C | 6.09867400  | 0.46634900  | 3.57727300  |

|   |             |             |             |
|---|-------------|-------------|-------------|
| C | 5.03982300  | 0.71013200  | 4.46962500  |
| C | 3.73120700  | 0.74127100  | 3.99903600  |
| C | 3.42729200  | 0.52025900  | 2.64233200  |
| O | 5.29241600  | 0.94306100  | 5.78490200  |
| O | 7.36443200  | 0.47733300  | 4.07352200  |
| O | 7.62816000  | -2.81845600 | -0.05420100 |
| C | 6.28508900  | -0.56631100 | -2.39713500 |
| O | 6.21432700  | 1.52997500  | -0.36625200 |
| O | 6.74334800  | -0.00093500 | 1.30409300  |
| H | 3.97005200  | 0.49506700  | -0.38057300 |
| O | 8.21340200  | -0.40775500 | -0.99583800 |
| C | -5.58051300 | 2.27515100  | 2.06067000  |
| O | -5.38904800 | 1.83251600  | 3.18268400  |
| C | -5.95710500 | 3.71112800  | 1.80811700  |
| C | 6.73615200  | -1.65104000 | -3.36709900 |
| C | 6.97697300  | -1.23323400 | -4.79519800 |
| O | 6.85549600  | -2.80669000 | -2.99193800 |
| H | -3.67385000 | -1.22522700 | 3.32393800  |
| H | -3.04004100 | -5.72107500 | -1.93630200 |
| H | -6.24281900 | -6.86021400 | -0.93464500 |
| H | -7.66446100 | -4.27151200 | 0.17063400  |
| H | -4.31948000 | 1.29385700  | 0.67105400  |
| H | -5.83645300 | 1.80973500  | -0.05272600 |
| H | -6.97342000 | -0.28793700 | -1.23342400 |
| H | -7.75005900 | -0.38184500 | 1.81254900  |
| H | 1.11803600  | -0.66093500 | -2.78561200 |
| H | 0.52053900  | -2.64634200 | -0.93219600 |
| H | 0.45865200  | -1.46543900 | 1.27335200  |
| H | -0.23894000 | 1.05211600  | 1.13287900  |
| H | 1.42417200  | 1.33467100  | -1.33931700 |
| H | -1.11698000 | -0.95519300 | -3.81169600 |
| H | -0.26336200 | -2.48100400 | -3.44335600 |
| H | -1.97274600 | 3.88001900  | 0.03069600  |
| H | 0.25395100  | 5.57939700  | -3.25533800 |
| H | -3.95757500 | 6.81536400  | 0.28108500  |
| H | -2.80491400 | 8.68270200  | -1.97784400 |
| H | -0.46052400 | 7.79863000  | -3.85774700 |
| H | 5.00410100  | -3.59712400 | -0.22065900 |
| H | 2.92639300  | 0.95356100  | 4.69195700  |
| H | 6.25077100  | 0.89472900  | 5.92816300  |
| H | 8.00001900  | 0.34556100  | 3.35366300  |
| H | 5.18863000  | -0.58968800 | -2.39962600 |
| H | 6.57340000  | 0.42558500  | -2.75260700 |
| H | 7.16039900  | 1.69574000  | -0.51902300 |
| H | 8.66445300  | -1.11494900 | -0.49706500 |
| H | -6.91658100 | 3.74940000  | 1.27957100  |
| H | -6.03029000 | 4.25311900  | 2.75188000  |
| H | -5.21526100 | 4.19472100  | 1.16121400  |
| H | 7.85217400  | -0.57381400 | -4.83375000 |
| H | 7.14770900  | -2.10710600 | -5.42475000 |
| H | 6.12801900  | -0.65389900 | -5.17415300 |



Cartesian coordinates of the lowest-energy conformer of amariin [**1-A** ( $^0\text{-}^3\text{B}$ )] at the B3LYP/6-31G(d,p) level in acetone (PCM).

|   |             |             |             |
|---|-------------|-------------|-------------|
| C | 0.05045800  | -0.92487600 | -2.39593100 |
| C | 0.67204700  | -1.69930000 | -1.20511200 |
| C | 0.31114400  | -1.04865300 | 0.13907800  |
| C | 0.73538300  | 0.43878700  | 0.15680500  |
| C | 0.48655900  | 1.09825800  | -1.22370700 |
| O | -0.42867900 | 0.36451900  | -1.99762600 |
| O | 2.10940000  | -1.56516900 | -1.36399300 |
| O | 2.15702700  | 0.46630900  | 0.38519200  |
| C | -1.09801800 | -1.62464800 | -3.11143900 |
| O | -1.11052400 | -1.15593500 | 0.26486900  |
| O | 0.02514200  | 2.44099100  | -1.14639900 |
| C | -1.18510800 | 2.72822700  | -0.59620600 |
| O | -1.88314600 | 1.87741400  | -0.05855300 |
| C | -1.52758300 | 4.15754000  | -0.71242400 |
| C | -0.72507200 | 5.04406200  | -1.45311300 |
| C | -1.09266200 | 6.38136700  | -1.53535400 |
| C | -2.24730600 | 6.83999600  | -0.88456900 |
| C | -3.04245400 | 5.95277000  | -0.14477000 |
| C | -2.68359700 | 4.61201600  | -0.05867600 |
| O | -0.41034700 | 7.34665800  | -2.22208400 |
| O | -2.64086800 | 8.14048600  | -0.93895800 |
| O | -4.16005100 | 6.40131800  | 0.48978900  |
| O | -2.25053800 | -1.85184300 | -2.27538900 |
| C | 2.90999600  | -2.34838600 | -0.61140500 |
| O | 2.53152200  | -3.30590400 | 0.02861000  |
| C | 2.62016300  | 0.82239600  | 1.61403700  |
| O | 1.89807600  | 1.30183800  | 2.46686800  |
| C | 4.33824400  | -1.89065800 | -0.69922100 |
| C | 5.28413200  | -2.84264400 | -0.83435300 |
| C | 6.67853700  | -2.47816300 | -1.09209700 |
| C | 7.04298200  | -0.98299000 | -0.96073900 |
| C | 5.90570800  | -0.08886200 | -1.47201300 |
| C | 4.66162900  | -0.39800800 | -0.62058900 |
| C | 4.95729100  | -0.02029400 | 0.83648600  |
| C | 6.27623400  | -0.24736900 | 1.25003000  |
| C | 6.72671200  | 0.04107900  | 2.54244800  |
| C | 5.84123000  | 0.58759700  | 3.47583900  |
| C | 4.52901500  | 0.82863800  | 3.09479700  |
| C | 4.07025700  | 0.53318900  | 1.79995000  |
| O | 6.25528400  | 0.88426600  | 4.73628800  |
| O | 8.00814800  | -0.17808100 | 2.93378100  |
| O | 7.55909300  | -3.26905300 | -1.40201400 |
| O | 8.20624600  | -0.71034200 | -1.64110800 |
| O | 7.26963000  | -0.76422800 | 0.44806600  |
| O | 6.21491700  | 1.26809300  | -1.31963900 |
| O | 5.62197500  | -0.43372000 | -2.80485300 |
| H | 3.83389900  | 0.18287500  | -1.01514700 |
| C | -1.64900900 | -1.04494300 | 1.49850200  |
| O | -1.00098700 | -1.04825900 | 2.52408400  |
| C | -2.40514700 | -3.08895500 | -1.74751300 |
| O | -1.61365200 | -3.99621800 | -1.94318600 |
| C | -3.13264400 | -0.84904200 | 1.41526100  |
| C | -3.78616100 | -0.61727100 | 2.57281400  |
| C | -5.19886700 | -0.22245800 | 2.57687700  |
| C | -5.94125800 | -0.29791700 | 1.22783800  |
| C | -5.00642000 | 0.14875300  | 0.08913900  |
| C | -3.82139000 | -0.83736000 | 0.05217000  |
| C | -4.33433900 | -2.24072300 | -0.24834800 |
| C | -5.55110800 | -2.57352000 | 0.35606100  |
| C | -6.10487500 | -3.85440200 | 0.26951400  |

|   |             |             |             |
|---|-------------|-------------|-------------|
| C | -5.42086500 | -4.85510000 | -0.42766300 |
| C | -4.21098800 | -4.54934300 | -1.04056900 |
| C | -3.67090900 | -3.25499800 | -0.97704600 |
| O | -5.93652200 | -6.11098800 | -0.52081800 |
| O | -7.29321800 | -4.17757600 | 0.84761800  |
| O | -5.80885900 | 0.14901400  | 3.57038400  |
| O | -7.09447600 | 0.43996100  | 1.26207300  |
| O | -6.31399600 | -1.69670300 | 1.08658400  |
| O | -5.64507400 | 0.09380800  | -1.15798200 |
| O | -4.61834600 | 1.45102800  | 0.43082200  |
| H | -3.12330600 | -0.50790000 | -0.71369600 |
| H | 0.84802200  | -0.80349200 | -3.14420600 |
| H | 0.39846900  | -2.75487500 | -1.21575700 |
| H | 0.79395200  | -1.57101700 | 0.96608500  |
| H | 0.22910400  | 0.96541400  | 0.96303200  |
| H | 1.44792600  | 1.18941300  | -1.74323700 |
| H | -1.45060500 | -0.97607200 | -3.91463500 |
| H | -0.75026600 | -2.57218700 | -3.52480500 |
| H | 0.16594700  | 4.69040400  | -1.95784600 |
| H | -3.29926900 | 3.93431300  | 0.51940600  |
| H | 0.38173100  | 6.97545600  | -2.63452300 |
| H | -2.00051700 | 8.63820400  | -1.47207200 |
| H | -4.24430500 | 7.35333100  | 0.32333600  |
| H | 5.02697900  | -3.89611700 | -0.85932800 |
| H | 3.83717800  | 1.24940700  | 3.81314000  |
| H | 7.19400600  | 0.65172700  | 4.81332400  |
| H | 8.50692600  | -0.53782300 | 2.18236200  |
| H | 8.67623600  | -1.56230600 | -1.73848600 |
| H | 7.10846600  | 1.41613600  | -1.66757400 |
| H | 6.45810700  | -0.41013200 | -3.29770200 |
| H | -3.25956800 | -0.62828700 | 3.52086100  |
| H | -3.68801800 | -5.32025200 | -1.59267900 |
| H | -6.77842000 | -6.13103300 | -0.03915100 |
| H | -7.64691800 | -3.38846800 | 1.28890900  |
| H | -7.30075200 | 0.57802200  | 2.20709700  |
| H | -6.39579500 | 0.70629000  | -1.10857300 |
| H | -3.71828200 | 1.63272600  | 0.09374000  |

Cartesian coordinates of the lowest-energy conformer of amariin [**1-A** (<sup>1</sup>C<sub>4</sub>)] at the B3LYP/6-31G(d,p) level in acetone (PCM).

|   |             |             |             |
|---|-------------|-------------|-------------|
| C | 0.33519600  | 0.20567700  | -2.12086500 |
| C | 0.82979800  | -0.74996000 | -1.03132300 |
| C | 0.61024600  | -0.20644500 | 0.39336500  |
| C | 1.12861500  | 1.23394500  | 0.52391700  |
| C | 0.81104000  | 2.13579800  | -0.67682300 |
| O | 0.89998100  | 1.51978900  | -1.93524000 |
| O | 2.25821100  | -0.79410700 | -1.25194400 |
| O | 2.56862100  | 1.15784700  | 0.60652000  |
| C | -1.19730400 | 0.29668800  | -2.32419600 |
| O | -0.79914700 | -0.22487100 | 0.71550900  |
| O | -0.50490500 | 2.65711200  | -0.43655000 |
| C | -0.75817400 | 3.93224000  | -0.88272900 |
| O | 0.09705200  | 4.62398100  | -1.40129700 |
| C | -2.16394300 | 4.32696800  | -0.66050900 |
| C | -3.07251700 | 3.47561400  | -0.00733700 |
| C | -4.39233000 | 3.88687500  | 0.15337500  |
| C | -4.79917500 | 5.14155400  | -0.32604000 |
| C | -3.88714600 | 5.99065700  | -0.96693200 |
| C | -2.56761600 | 5.58306300  | -1.13572700 |
| O | -5.37560400 | 3.16397800  | 0.75590300  |
| O | -6.08255100 | 5.57752900  | -0.18878500 |
| O | -4.29170200 | 7.20765300  | -1.42901200 |
| O | -1.90724500 | -0.80538700 | -1.72305700 |
| C | 3.00155600  | -1.78262400 | -0.71865600 |
| O | 2.56282900  | -2.79635500 | -0.22103900 |
| C | 3.10057400  | 1.02370600  | 1.85469500  |
| O | 2.42363500  | 1.16008400  | 2.85709800  |
| C | 4.45744200  | -1.44051900 | -0.86711600 |
| C | 5.31208500  | -2.43522400 | -1.18073900 |
| C | 6.70640700  | -2.14231600 | -1.52552700 |
| C | 7.19450500  | -0.69382900 | -1.29678900 |
| C | 6.08273600  | 0.31845600  | -1.61700300 |
| C | 4.89554100  | 0.01120100  | -0.67625400 |
| C | 5.32756200  | 0.21660400  | 0.77698500  |
| C | 6.65558800  | -0.13243300 | 1.04612200  |
| C | 7.22689300  | -0.01771600 | 2.31768500  |
| C | 6.45228900  | 0.45494600  | 3.38108000  |
| C | 5.12555700  | 0.78869300  | 3.14916800  |
| C | 4.54948900  | 0.68077900  | 1.87123500  |
| O | 6.98456200  | 0.58437900  | 4.62571000  |
| O | 8.52051000  | -0.34561500 | 2.56699100  |
| O | 7.49407700  | -2.96064000 | -1.97975600 |
| O | 8.33290300  | -0.44642500 | -2.01506000 |
| O | 7.53544800  | -0.62192800 | 0.11105200  |
| O | 6.48776000  | 1.63588900  | -1.38333700 |
| O | 5.76443600  | 0.09614300  | -2.96682200 |
| H | 4.07685800  | 0.67968200  | -0.93064400 |
| C | -1.26140800 | -1.41354300 | 1.17078800  |
| O | -0.56072700 | -2.38224000 | 1.36760900  |
| C | -2.61263700 | -1.65062700 | -2.51384800 |
| O | -2.47133400 | -1.70841900 | -3.72017400 |
| C | -2.73447900 | -1.40572800 | 1.46842000  |
| C | -3.09288500 | -1.90598100 | 2.66999300  |
| C | -4.49129900 | -1.91764700 | 3.09154100  |
| C | -5.53579500 | -1.58768200 | 2.00376900  |
| C | -5.04009400 | -0.46480700 | 1.08298900  |
| C | -3.74385800 | -0.95303000 | 0.41407500  |
| C | -4.08914800 | -2.16261900 | -0.46052300 |
| C | -5.05947400 | -3.02199500 | 0.07015600  |

|   |             |             |             |
|---|-------------|-------------|-------------|
| C | -5.47212200 | -4.18639500 | -0.58350700 |
| C | -4.92423700 | -4.50853400 | -1.83050000 |
| C | -3.99356300 | -3.64992100 | -2.40121000 |
| C | -3.56375700 | -2.49201000 | -1.73551300 |
| O | -5.31261100 | -5.63254300 | -2.48768900 |
| O | -6.40743500 | -5.02514700 | -0.06738100 |
| O | -4.88672300 | -2.18849800 | 4.21693100  |
| O | -6.73087000 | -1.22672000 | 2.57928000  |
| O | -5.71782800 | -2.81065200 | 1.26350800  |
| O | -5.96271500 | -0.15773800 | 0.08557100  |
| O | -4.74760600 | 0.66766200  | 1.89221000  |
| H | -3.33215200 | -0.14274500 | -0.18133500 |
| H | 0.79468400  | -0.13598800 | -3.05091200 |
| H | 0.40175700  | -1.74692300 | -1.13633900 |
| H | 1.13114800  | -0.84590500 | 1.10703000  |
| H | 0.73510900  | 1.68993900  | 1.43187400  |
| H | 1.51644800  | 2.96546200  | -0.71397600 |
| H | -1.57706200 | 1.19184100  | -1.83810800 |
| H | -1.42661500 | 0.32870100  | -3.38869500 |
| H | -2.74893200 | 2.51702900  | 0.37790900  |
| H | -1.86015200 | 6.23201200  | -1.63713500 |
| H | -5.05455300 | 2.28140000  | 1.03495100  |
| H | -6.59062800 | 4.88060700  | 0.25745500  |
| H | -5.23535000 | 7.30871300  | -1.22822800 |
| H | 4.97161700  | -3.45958700 | -1.28848600 |
| H | 4.51664100  | 1.13691500  | 3.97351600  |
| H | 7.91374300  | 0.30749900  | 4.59202000  |
| H | 8.93181900  | -0.63968300 | 1.73782700  |
| H | 8.70890000  | -1.32012000 | -2.23926300 |
| H | 7.27120700  | 1.79130700  | -1.93513900 |
| H | 5.04133600  | 0.69689800  | -3.20335900 |
| H | -2.35201100 | -2.25675000 | 3.37991200  |
| H | -3.59513500 | -3.87468200 | -3.38272900 |
| H | -5.97196100 | -6.09353300 | -1.94528700 |
| H | -6.71374800 | -4.67136800 | 0.78299300  |
| H | -6.72561200 | -1.59752600 | 3.48474500  |
| H | -6.83754700 | -0.06103700 | 0.49512300  |
| H | -5.45893300 | 0.74847200  | 2.55211500  |

Cartesian coordinates of the lowest-energy conformer of amariin [**1-B** (<sup>0,3</sup>**B**)] at the B3LYP/6-31G(d,p) level in acetone (PCM).

|   |             |             |             |
|---|-------------|-------------|-------------|
| C | 3.00989600  | -2.28029400 | -0.21140200 |
| O | 2.63690400  | -3.09921500 | 0.59906700  |
| C | 2.70671600  | 0.63246700  | 1.84998600  |
| O | 1.94425800  | 0.76203000  | 2.78929800  |
| C | 4.44146800  | -1.94689800 | -0.52877100 |
| C | 5.24015700  | -2.98666800 | -0.84095700 |
| C | 6.57390200  | -2.78299900 | -1.41574500 |
| C | 6.82743100  | -1.38265200 | -2.00015000 |
| C | 6.34636300  | -0.31281900 | -1.01049500 |
| C | 4.88631700  | -0.48586600 | -0.50249400 |
| C | 5.03766300  | 0.01595500  | 0.94541000  |
| C | 6.39945400  | -0.04514500 | 1.22751500  |
| C | 6.95716900  | 0.27452000  | 2.45752100  |
| C | 6.08132900  | 0.67435500  | 3.48193800  |
| C | 4.71665700  | 0.76473600  | 3.22861000  |
| C | 4.17332100  | 0.45288000  | 1.96785000  |
| O | 6.56522000  | 0.99925700  | 4.70922400  |
| O | 8.28609000  | 0.22946000  | 2.73822700  |
| O | 7.42871900  | -3.64828300 | -1.52708100 |
| O | 8.18256500  | -1.18366300 | -2.24415800 |
| O | 6.46317300  | 0.96186900  | -1.56654700 |
| O | 7.17836600  | -0.43308500 | 0.16618900  |
| H | 4.20952300  | 0.12547100  | -1.09951100 |
| O | 6.04380100  | -1.31550600 | -3.17017800 |
| C | 0.14901900  | -0.97515300 | -2.08052000 |
| C | 0.75886900  | -1.65713700 | -0.83147000 |
| C | 0.40856900  | -0.88567700 | 0.45044600  |
| C | 0.85873600  | 0.58376200  | 0.34260200  |
| C | 0.60926100  | 1.13667800  | -1.08410100 |
| O | -0.31488000 | 0.34701600  | -1.79307700 |
| O | 2.19715600  | -1.57002700 | -1.02149000 |
| O | 2.28447800  | 0.63986600  | 0.55654600  |
| C | -0.98582800 | -1.73310100 | -2.73872600 |
| O | -1.01037900 | -0.85823400 | 0.61448100  |
| O | 0.14672800  | 2.48039400  | -1.11649300 |
| C | -1.05263500 | 2.80833000  | -0.55959500 |
| O | -1.72169300 | 2.00401600  | 0.07174600  |
| C | -1.42206800 | 4.21555100  | -0.79729300 |
| C | -0.59964400 | 5.07947500  | -1.53656700 |
| C | -0.99291100 | 6.40001800  | -1.73184100 |
| C | -2.20356200 | 6.85532600  | -1.19080500 |
| C | -3.02251700 | 5.98600500  | -0.45447200 |
| C | -2.63843900 | 4.66689000  | -0.25453500 |
| O | -0.20159300 | 7.24667800  | -2.44694000 |
| O | -2.54072900 | 8.15453000  | -1.41040200 |
| O | -4.17353400 | 6.55602800  | 0.01360900  |
| O | -2.08639100 | -1.91552600 | -1.82074200 |
| C | -1.61346000 | -1.80146000 | 1.36351900  |
| O | -1.05632400 | -2.73892200 | 1.89047100  |
| C | -3.08783900 | -2.68886900 | -2.30773600 |
| O | -2.99665200 | -3.23544800 | -3.39410200 |
| C | -3.05657000 | -1.42202700 | 1.51002100  |
| C | -3.58252700 | -1.48896100 | 2.75055200  |
| C | -4.86717100 | -0.85206700 | 3.04991800  |
| C | -5.68295100 | -0.33917200 | 1.84590400  |
| C | -4.76045100 | 0.25679300  | 0.76656800  |
| C | -3.81281300 | -0.87304100 | 0.30143500  |
| C | -4.62666600 | -2.00704400 | -0.31875300 |
| C | -5.85972400 | -2.25250200 | 0.29711700  |

|   |             |             |             |
|---|-------------|-------------|-------------|
| C | -6.71731100 | -3.27954700 | -0.10809600 |
| C | -6.35486400 | -4.09272300 | -1.18533500 |
| C | -5.15695400 | -3.84567500 | -1.84077100 |
| C | -4.28592200 | -2.82204300 | -1.42812700 |
| O | -7.17067700 | -5.09881700 | -1.60264600 |
| O | -7.90977000 | -3.51620700 | 0.49962400  |
| O | -5.32120900 | -0.70228700 | 4.17662900  |
| O | -6.63892600 | 0.55404800  | 2.25029600  |
| O | -6.36374700 | -1.51948500 | 1.34328300  |
| O | -5.48502400 | 0.68990600  | -0.35353900 |
| O | -4.08409400 | 1.30330000  | 1.40155700  |
| H | -3.10661500 | -0.46060200 | -0.41625200 |
| H | 4.88901100  | -4.00914500 | -0.74318200 |
| H | 4.05543600  | 1.09642800  | 4.01954100  |
| H | 7.52944200  | 0.89158100  | 4.69953600  |
| H | 8.78392800  | -0.01210200 | 1.94241600  |
| H | 8.57864400  | -2.07164400 | -2.31626500 |
| H | 7.40051000  | 1.09451800  | -1.78761300 |
| H | 6.04992500  | -0.38672000 | -3.45554500 |
| H | 0.95063300  | -0.92488800 | -2.83208600 |
| H | 0.46902800  | -2.70568300 | -0.74242300 |
| H | 0.86643600  | -1.36545100 | 1.31646300  |
| H | 0.34808100  | 1.16804700  | 1.10448500  |
| H | 1.56867300  | 1.18271300  | -1.61328500 |
| H | -1.33752700 | -1.17546200 | -3.61005600 |
| H | -0.62622400 | -2.70755000 | -3.07656600 |
| H | 0.33602400  | 4.73759200  | -1.95912000 |
| H | -3.26824400 | 3.98582900  | 0.30710300  |
| H | -0.63394700 | 8.11458000  | -2.47760800 |
| H | -3.39387200 | 8.33166600  | -0.98287000 |
| H | -4.68589700 | 5.91737500  | 0.52823000  |
| H | -3.01525700 | -1.89164700 | 3.58296800  |
| H | -4.88975700 | -4.44936500 | -2.69837000 |
| H | -7.95684700 | -5.10982100 | -1.03432600 |
| H | -8.02733000 | -2.86650600 | 1.21165300  |
| H | -6.74879200 | 0.41511100  | 3.21149300  |
| H | -6.09160900 | 1.37878100  | -0.03909400 |
| H | -3.30486600 | 1.56214600  | 0.86854100  |

Cartesian coordinates of the lowest-energy conformer of amariin [**1-B** (<sup>1</sup>C<sub>4</sub>)] at the B3LYP/6-31G(d,p) level in acetone (PCM).

|   |             |             |             |
|---|-------------|-------------|-------------|
| C | 3.08096200  | -1.63543600 | -0.63096900 |
| O | 2.65808100  | -2.62329400 | -0.07067900 |
| C | 2.88279600  | 0.78207200  | 2.03483300  |
| O | 2.15478600  | 0.68049900  | 3.00524100  |
| C | 4.52671900  | -1.28658100 | -0.85102600 |
| C | 5.30484200  | -2.26172000 | -1.36058700 |
| C | 6.63466100  | -1.96956900 | -1.90627800 |
| C | 6.89085700  | -0.48813800 | -2.23541900 |
| C | 6.44593400  | 0.38660400  | -1.05466200 |
| C | 4.99672800  | 0.13619900  | -0.55209200 |
| C | 5.19261400  | 0.34424000  | 0.96164700  |
| C | 6.56339500  | 0.21821200  | 1.19053700  |
| C | 7.14824000  | 0.26994400  | 2.45094900  |
| C | 6.28559700  | 0.45716300  | 3.54709600  |
| C | 4.92059800  | 0.61316500  | 3.35390500  |
| C | 4.34949300  | 0.57180300  | 2.06561400  |
| O | 6.91574700  | 0.49353000  | 4.75687200  |
| O | 8.48715400  | 0.14655600  | 2.60103100  |
| O | 7.47977800  | -2.80667400 | -2.18370400 |
| O | 8.24295400  | -0.26118300 | -2.47435400 |
| O | 6.56564900  | 1.74166700  | -1.37679900 |
| O | 7.30537700  | 0.04803000  | 0.05109000  |
| H | 4.31062400  | 0.85692800  | -0.99765900 |
| O | 6.08326200  | -0.20099900 | -3.35469900 |
| C | 0.44126600  | 0.31854400  | -2.13986900 |
| C | 0.87984700  | -0.72015000 | -1.09587800 |
| C | 0.56020900  | -0.33812000 | 0.36023400  |
| C | 0.97337600  | 1.11206300  | 0.65599200  |
| C | 0.65886200  | 2.10467500  | -0.46837600 |
| O | 0.90813100  | 1.62978100  | -1.76013600 |
| O | 2.32531000  | -0.69648000 | -1.22890700 |
| O | 2.41242800  | 1.11697500  | 0.80148700  |
| C | -1.04072500 | 0.34271200  | -2.61454300 |
| O | -0.84894800 | -0.48960100 | 0.58746800  |
| O | -0.71801600 | 2.50267900  | -0.33191500 |
| C | -0.97643300 | 3.84091500  | -0.52621000 |
| O | -0.08828100 | 4.66568600  | -0.63552700 |
| C | -2.41971000 | 4.15148900  | -0.58838100 |
| C | -2.77117100 | 5.50340100  | -0.72086100 |
| C | -4.11142200 | 5.86222500  | -0.81115900 |
| C | -5.09751900 | 4.86831300  | -0.77485300 |
| C | -4.74730000 | 3.51490100  | -0.64480300 |
| C | -3.40651600 | 3.15072800  | -0.54655900 |
| O | -4.46264900 | 7.17347500  | -0.93714800 |
| O | -6.39804100 | 5.26168800  | -0.87112600 |
| O | -5.81290900 | 2.66762900  | -0.63970900 |
| O | -1.98551900 | -0.47319000 | -1.89023900 |
| C | -1.24000000 | -1.32860600 | 1.57601000  |
| O | -0.48446000 | -1.93211000 | 2.30594000  |
| C | -2.03394000 | -1.78182400 | -2.22595400 |
| O | -1.26280300 | -2.26812100 | -3.03750400 |
| C | -2.73570200 | -1.38910200 | 1.67149000  |
| C | -3.25037600 | -1.85157100 | 2.83009000  |
| C | -4.69526800 | -1.84698800 | 3.06239300  |
| C | -5.58519500 | -1.52218200 | 1.84335100  |
| C | -4.94326000 | -0.41918100 | 0.99276800  |
| C | -3.59406600 | -0.95077900 | 0.48758000  |
| C | -3.84643400 | -2.16546800 | -0.40312900 |
| C | -4.87561500 | -3.01301600 | 0.02405000  |

|   |             |             |             |
|---|-------------|-------------|-------------|
| C | -5.18083500 | -4.21409500 | -0.62221900 |
| C | -4.43217900 | -4.60143700 | -1.73875800 |
| C | -3.41511900 | -3.77151100 | -2.19239300 |
| C | -3.11804300 | -2.55615800 | -1.55408900 |
| O | -4.70440100 | -5.76512000 | -2.38558500 |
| O | -6.18242400 | -5.03456100 | -0.21317100 |
| O | -5.23560700 | -2.09505500 | 4.13059700  |
| O | -6.84130700 | -1.13866000 | 2.24423200  |
| O | -5.69013300 | -2.75887300 | 1.10657200  |
| O | -5.75380500 | -0.10115400 | -0.12220700 |
| O | -4.70561400 | 0.70746300  | 1.79010700  |
| H | -3.08713100 | -0.16660500 | -0.06561600 |
| H | 4.93216400  | -3.27631800 | -1.46127400 |
| H | 4.26755600  | 0.78107700  | 4.20310000  |
| H | 6.28008600  | 0.64455800  | 5.47013100  |
| H | 8.68695100  | 0.21418600  | 3.54917900  |
| H | 8.62869100  | -1.12962700 | -2.69265100 |
| H | 7.50189400  | 1.90349300  | -1.58236200 |
| H | 6.08146700  | 0.76596600  | -3.45163500 |
| H | 1.04263800  | 0.10390100  | -3.02559700 |
| H | 0.50471600  | -1.71643500 | -1.33214000 |
| H | 1.08734100  | -1.01018700 | 1.03655600  |
| H | 0.51052300  | 1.44934400  | 1.58341200  |
| H | 1.28661300  | 2.98754300  | -0.35534700 |
| H | -1.41845300 | 1.35691300  | -2.51123400 |
| H | -1.07511200 | 0.04384000  | -3.66207700 |
| H | -2.00324500 | 6.26606100  | -0.75594400 |
| H | -3.12682800 | 2.11179200  | -0.43856300 |
| H | -5.42997500 | 7.22314700  | -0.98960500 |
| H | -6.95440700 | 4.46682300  | -0.82470500 |
| H | -5.56303000 | 1.73494700  | -0.48073800 |
| H | -2.60469100 | -2.16888000 | 3.64118100  |
| H | -2.84641200 | -4.06170800 | -3.06654400 |
| H | -5.44187900 | -6.20324600 | -1.93219000 |
| H | -6.61580300 | -4.64150800 | 0.56133400  |
| H | -6.96628800 | -1.48877600 | 3.14881400  |
| H | -6.68554900 | -0.13549700 | 0.15391800  |
| H | -5.53338000 | 0.93717800  | 2.24361900  |



Cartesian coordinates of the lowest-energy conformer of amariin [**1-C** (<sup>0</sup>**3B**)] at the B3LYP/6-31G(d,p) level in acetone (PCM).

|   |             |             |             |
|---|-------------|-------------|-------------|
| C | 0.18199900  | -0.94190400 | -2.36459100 |
| C | 0.84767000  | -1.68223300 | -1.18006500 |
| C | 0.40875600  | -1.08099200 | 0.16288300  |
| C | 0.73501400  | 0.42380800  | 0.21257600  |
| C | 0.34496700  | 1.12385600  | -1.11070800 |
| O | -0.42345700 | 0.28877400  | -1.95672700 |
| O | 2.26989200  | -1.43670500 | -1.31891500 |
| O | 2.15064700  | 0.57215600  | 0.41517900  |
| C | -0.89416200 | -1.75203100 | -3.07996500 |
| O | -1.02278800 | -1.22473800 | 0.23303100  |
| O | -0.52223500 | 2.18501200  | -0.76702300 |
| C | -0.51642800 | 3.31814400  | -1.54343200 |
| O | 0.31587600  | 3.51932200  | -2.40593000 |
| C | -1.62000200 | 4.22755500  | -1.17089500 |
| C | -1.61211800 | 5.52507100  | -1.70326300 |
| C | -2.64075900 | 6.40525800  | -1.38181000 |
| C | -3.68260400 | 5.98228600  | -0.54370400 |
| C | -3.69405200 | 4.68027000  | -0.02208100 |
| C | -2.65789600 | 3.80173800  | -0.32401500 |
| O | -2.64257500 | 7.67037100  | -1.89034300 |
| O | -4.67778800 | 6.87193700  | -0.27174900 |
| O | -4.76372000 | 4.38790700  | 0.77477100  |
| O | -1.99132800 | -2.11757800 | -2.21818500 |
| C | 3.12525600  | -2.17502200 | -0.58222800 |
| O | 2.81628400  | -3.16260700 | 0.04932700  |
| C | 2.59228100  | 0.91923400  | 1.65748800  |
| O | 1.83483400  | 1.28977200  | 2.53375900  |
| C | 4.51572900  | -1.61637800 | -0.68066300 |
| C | 5.52874400  | -2.49267100 | -0.83851800 |
| C | 6.89045900  | -2.02455300 | -1.11068000 |
| C | 7.14477500  | -0.50773400 | -0.97079000 |
| C | 5.93425300  | 0.29781600  | -1.46949400 |
| C | 4.72172600  | -0.10430400 | -0.59880400 |
| C | 4.98664300  | 0.28931700  | 0.85679300  |
| C | 6.32054200  | 0.16196200  | 1.25880500  |
| C | 6.75810800  | 0.48544600  | 2.54758900  |
| C | 5.83971400  | 0.96146900  | 3.48782900  |
| C | 4.50829600  | 1.09346800  | 3.11954500  |
| C | 4.06357900  | 0.76411800  | 1.82757500  |
| O | 6.23974000  | 1.29216000  | 4.74469100  |
| O | 8.05599500  | 0.36566900  | 2.92737900  |
| O | 7.82186400  | -2.74876200 | -1.43345200 |
| O | 8.29790800  | -0.14489300 | -1.61273800 |
| O | 7.33697500  | -0.28627500 | 0.44949800  |
| O | 6.12503300  | 1.67536200  | -1.33202100 |
| O | 5.77518000  | -0.08102500 | -2.81310200 |
| H | 3.84375600  | 0.41043900  | -0.98004300 |
| C | -1.60107300 | -1.17846500 | 1.45188800  |
| O | -0.99529200 | -1.27476400 | 2.49703300  |
| C | -1.98353100 | -3.35492900 | -1.67117000 |
| O | -1.12248900 | -4.18792400 | -1.89851800 |
| C | -3.06733500 | -0.86059100 | 1.33376000  |
| C | -3.60680100 | -0.29762900 | 2.43596400  |
| C | -4.95932100 | 0.25993000  | 2.45242400  |
| C | -5.61955400 | 0.45979400  | 1.08143400  |
| C | -5.32216700 | -0.73965700 | 0.17467400  |
| C | -3.82315000 | -1.10798600 | 0.02681500  |
| C | -3.96467000 | -2.61177400 | -0.22248300 |
| C | -5.17891600 | -2.97619600 | 0.35426700  |

|   |             |             |             |
|---|-------------|-------------|-------------|
| C | -5.62874300 | -4.28492700 | 0.43820300  |
| C | -4.79465800 | -5.28714200 | -0.09357700 |
| C | -3.60359400 | -4.94349600 | -0.72916200 |
| C | -3.18147800 | -3.60472000 | -0.82712100 |
| O | -5.17584700 | -6.59038100 | -0.03628600 |
| O | -6.81223500 | -4.67235800 | 0.98553100  |
| O | -5.55945200 | 0.60282900  | 3.45973700  |
| O | -6.98860900 | 0.61480100  | 1.20310200  |
| O | -5.84875800 | -0.52011200 | -1.09898200 |
| O | -5.92417600 | -1.90282200 | 0.79291000  |
| H | -3.35829100 | -0.56718600 | -0.79766900 |
| O | -4.99305900 | 1.59936200  | 0.49470700  |
| H | 0.96935800  | -0.74421000 | -3.10643300 |
| H | 0.66220400  | -2.75591100 | -1.21070900 |
| H | 0.87593600  | -1.59922400 | 1.00058200  |
| H | 0.20855400  | 0.88936100  | 1.04572800  |
| H | 1.23038800  | 1.50700400  | -1.62945800 |
| H | -0.45080500 | -2.64968500 | -3.51394200 |
| H | -1.33588700 | -1.13786600 | -3.86568600 |
| H | -0.81116200 | 5.84499400  | -2.35873100 |
| H | -2.66890500 | 2.79682900  | 0.07694300  |
| H | -3.43634200 | 8.12447300  | -1.56674100 |
| H | -5.34601400 | 6.41709800  | 0.26684500  |
| H | -4.86200900 | 3.41921200  | 0.87386500  |
| H | 5.35072700  | -3.56239400 | -0.86794100 |
| H | 3.79098900  | 1.45270000  | 3.84622300  |
| H | 7.19566400  | 1.14068300  | 4.81161300  |
| H | 8.57395600  | 0.05161800  | 2.16825400  |
| H | 8.81139200  | -0.96704200 | -1.73662400 |
| H | 6.93213200  | 1.89836900  | -1.82331100 |
| H | 5.01225800  | 0.40022600  | -3.16806900 |
| H | -3.02204800 | -0.21637500 | 3.34593000  |
| H | -3.00937600 | -5.72425700 | -1.18813100 |
| H | -6.03264300 | -6.64152700 | 0.41624500  |
| H | -7.31540200 | -3.89583900 | 1.27306800  |
| H | -7.15220400 | 0.91521300  | 2.11670500  |
| H | -6.80876300 | -0.40165000 | -1.00050000 |
| H | -5.23182000 | 1.58780300  | -0.44924300 |

Cartesian coordinates of the lowest-energy conformer of amariin [**1-C** (<sup>1</sup>C<sub>4</sub>)] at the B3LYP/6-31G(d,p) level in acetone (PCM).

|   |             |             |             |
|---|-------------|-------------|-------------|
| C | 0.40710800  | 0.11538600  | -2.24828600 |
| C | 0.87552400  | -0.81061900 | -1.11968400 |
| C | 0.59126000  | -0.26718500 | 0.29514100  |
| C | 1.02961700  | 1.19812400  | 0.43312800  |
| C | 0.66621800  | 2.06879500  | -0.77483600 |
| O | 0.86787600  | 1.46369600  | -2.02268100 |
| O | 2.31397500  | -0.80451400 | -1.27831000 |
| O | 2.46936100  | 1.21308100  | 0.54257300  |
| C | -1.09667200 | 0.08371300  | -2.63478100 |
| O | -0.81736200 | -0.31864700 | 0.59258100  |
| O | -0.70655400 | 2.46007000  | -0.58886200 |
| C | -1.05064000 | 3.69384500  | -1.08725500 |
| O | -0.24170800 | 4.42180300  | -1.63157500 |
| C | -2.48193300 | 4.01330200  | -0.89728300 |
| C | -3.34575600 | 3.19995200  | -0.13951300 |
| C | -4.68346200 | 3.57053500  | -0.01119500 |
| C | -5.15124200 | 4.73828400  | -0.63597100 |
| C | -4.28675600 | 5.54531900  | -1.38462200 |
| C | -2.95018400 | 5.18352600  | -1.51308000 |
| O | -5.64106900 | 2.89940800  | 0.68432700  |
| O | -6.45274700 | 5.12683100  | -0.53222900 |
| O | -4.75077900 | 6.67778500  | -1.98553900 |
| O | -1.92565900 | -0.81225100 | -1.87128000 |
| C | 3.07485000  | -1.74817300 | -0.69198800 |
| O | 2.65774200  | -2.76458500 | -0.18113400 |
| C | 2.97954100  | 1.13344100  | 1.80554200  |
| O | 2.27433200  | 1.26010400  | 2.78956500  |
| C | 4.51899100  | -1.34822800 | -0.80319200 |
| C | 5.42526200  | -2.31235700 | -1.06232600 |
| C | 6.81416600  | -1.96664300 | -1.38032300 |
| C | 7.22958000  | -0.49068200 | -1.18674700 |
| C | 6.08243100  | 0.45915300  | -1.56724800 |
| C | 4.88611600  | 0.12750200  | -0.64697700 |
| C | 5.26966100  | 0.39847500  | 0.80860600  |
| C | 6.60454300  | 0.11935500  | 1.12235700  |
| C | 7.13665100  | 0.30162400  | 2.40293400  |
| C | 6.31399000  | 0.77399500  | 3.42969100  |
| C | 4.98023100  | 1.03888100  | 3.15349800  |
| C | 4.44265600  | 0.86217800  | 1.86635400  |
| O | 6.80668000  | 0.96898400  | 4.68205900  |
| O | 8.43641600  | 0.04074900  | 2.69517800  |
| O | 7.64956100  | -2.76165300 | -1.78810600 |
| O | 8.37389500  | -0.21257100 | -1.88434300 |
| O | 7.52993300  | -0.35920700 | 0.22616600  |
| O | 6.42224400  | 1.80014900  | -1.36627300 |
| O | 5.81004000  | 0.18020100  | -2.91657600 |
| H | 4.04527800  | 0.74992100  | -0.94313400 |
| C | -1.27270600 | -1.46495100 | 1.14721400  |
| O | -0.58558200 | -2.43179300 | 1.38773200  |
| C | -2.03221900 | -2.09346400 | -2.29700900 |
| O | -1.34096300 | -2.55612300 | -3.18673700 |
| C | -2.72853900 | -1.34279600 | 1.49627600  |
| C | -3.04723100 | -1.56429500 | 2.78823600  |
| C | -4.40091500 | -1.32809100 | 3.29216500  |
| C | -5.30399200 | -0.48047600 | 2.37767800  |
| C | -5.18351800 | -0.98667600 | 0.93616500  |
| C | -3.73630600 | -1.05485100 | 0.38820000  |
| C | -3.84085900 | -2.29755800 | -0.50139200 |
| C | -4.92685000 | -3.01953900 | -0.01607600 |

|   |             |             |             |
|---|-------------|-------------|-------------|
| C | -5.29952800 | -4.26326200 | -0.50618400 |
| C | -4.52035100 | -4.81090600 | -1.54382400 |
| C | -3.45240900 | -4.09097800 | -2.07334500 |
| C | -3.10064500 | -2.82475800 | -1.57249700 |
| O | -4.83562000 | -6.02700200 | -2.06135900 |
| O | -6.35960500 | -4.98925700 | -0.06287900 |
| O | -4.81797300 | -1.67642500 | 4.38783400  |
| O | -6.61770900 | -0.52322100 | 2.80426100  |
| O | -5.95853300 | -0.25107100 | 0.05604900  |
| O | -5.62569400 | -2.37468300 | 0.97711400  |
| H | -3.48200600 | -0.14653900 | -0.15644400 |
| O | -4.79573700 | 0.85339200  | 2.35576500  |
| H | 0.97740000  | -0.18842600 | -3.12821900 |
| H | 0.49484500  | -1.82592200 | -1.23636100 |
| H | 1.12041700  | -0.88436600 | 1.02299600  |
| H | 0.59258400  | 1.62766200  | 1.33382300  |
| H | 1.28748300  | 2.96365400  | -0.78802500 |
| H | -1.18770100 | -0.18011700 | -3.68868000 |
| H | -1.52739000 | 1.06670000  | -2.46560000 |
| H | -2.97574000 | 2.30928200  | 0.35337100  |
| H | -2.27553400 | 5.80240500  | -2.09142900 |
| H | -5.29730400 | 2.09575800  | 1.12773100  |
| H | -6.91538400 | 4.47102100  | 0.01507500  |
| H | -5.69612500 | 6.76042000  | -1.78452200 |
| H | 5.13346700  | -3.35371000 | -1.14783200 |
| H | 4.33509200  | 1.38575000  | 3.95034800  |
| H | 7.74805600  | 0.73447400  | 4.68120200  |
| H | 8.88170400  | -0.26190000 | 1.88688800  |
| H | 8.79682200  | -1.07374000 | -2.06981300 |
| H | 7.21259300  | 1.97311800  | -1.90277700 |
| H | 5.06449700  | 0.73641800  | -3.18981600 |
| H | -2.29709700 | -1.88621100 | 3.50327200  |
| H | -2.89724600 | -4.50495600 | -2.90622600 |
| H | -5.61261900 | -6.37059400 | -1.59254900 |
| H | -6.85147100 | -4.48675600 | 0.60394400  |
| H | -6.60435800 | -0.94035900 | 3.68798600  |
| H | -6.85706500 | -0.20209500 | 0.42272000  |
| H | -4.93740200 | 1.24972600  | 3.23018900  |

Cartesian coordinates of the lowest-energy conformer of amariin [**1-D** ( $^0\text{3B}$ )] at the B3LYP/6-31G(d,p) level in acetone (PCM).

|   |             |             |             |
|---|-------------|-------------|-------------|
| C | -2.12355200 | -1.31159800 | 1.32318500  |
| O | -1.60307200 | -2.00221200 | 2.17052400  |
| C | -2.67870600 | -2.67232800 | -2.08756800 |
| O | -1.93193400 | -3.54812100 | -2.49123400 |
| C | -3.54935900 | -0.83728500 | 1.35451600  |
| C | -4.04516500 | -0.60185500 | 2.58724400  |
| C | -5.33999400 | 0.05252000  | 2.79234600  |
| C | -5.92474700 | 0.76093200  | 1.56163800  |
| C | -5.76882900 | -0.14025800 | 0.33180300  |
| C | -4.32595900 | -0.63894500 | 0.05370900  |
| C | -4.63604400 | -2.01043500 | -0.55772100 |
| C | -5.90294100 | -2.35305400 | -0.09218400 |
| C | -6.50461200 | -3.58147700 | -0.32313600 |
| C | -5.77436800 | -4.52892000 | -1.06340900 |
| C | -4.52312600 | -4.19852900 | -1.57730500 |
| C | -3.94366000 | -2.93516000 | -1.35456200 |
| O | -6.30654900 | -5.75346200 | -1.31850700 |
| O | -7.74457400 | -3.93431400 | 0.11094400  |
| O | -5.92729800 | 0.11386000  | 3.86214500  |
| O | -5.14726500 | 1.92403400  | 1.38856800  |
| O | -6.24495700 | 0.49703800  | -0.81180500 |
| O | -6.53014900 | -1.34844000 | 0.60328200  |
| H | -3.79794400 | 0.03643100  | -0.61931700 |
| O | -7.27793600 | 1.03412800  | 1.73971400  |
| C | -0.13948000 | -0.50784500 | -2.31532500 |
| C | 0.32001100  | -1.46732400 | -1.18970100 |
| C | -0.04846000 | -0.90726700 | 0.19279300  |
| C | 0.57699300  | 0.49075600  | 0.38181000  |
| C | 0.54017200  | 1.29156500  | -0.93327100 |
| O | -0.46431000 | 0.78419500  | -1.78909100 |
| O | 1.77224800  | -1.48913100 | -1.26942100 |
| O | 1.96544400  | 0.33443200  | 0.73292100  |
| C | -1.33162000 | -0.99704600 | -3.12546700 |
| O | -1.47937100 | -0.77364600 | 0.26095200  |
| O | 0.18822300  | 2.62213100  | -0.62368100 |
| C | 0.59059100  | 3.58979200  | -1.51269200 |
| O | 1.25230500  | 3.33328900  | -2.49991800 |
| C | 0.13640400  | 4.93753900  | -1.11355600 |
| C | -0.63924200 | 5.15048400  | 0.03545800  |
| C | -1.03830000 | 6.44361100  | 0.36309800  |
| C | -0.66266400 | 7.51912600  | -0.45337800 |
| C | 0.11270100  | 7.29893000  | -1.60114400 |
| C | 0.51358700  | 6.01234500  | -1.93645400 |
| O | -1.79297600 | 6.66064600  | 1.47653300  |
| O | -1.07878300 | 8.76315200  | -0.08765900 |
| O | 0.40871900  | 8.43097100  | -2.30966900 |
| O | -2.47368900 | -1.35382100 | -2.31831700 |
| C | 2.44256600  | -2.41888400 | -0.55741400 |
| O | 1.92580100  | -3.32632600 | 0.05630600  |
| C | 2.24650800  | 0.04352700  | 2.03188100  |
| O | 1.41099300  | 0.10407600  | 2.91379300  |
| C | 3.92242600  | -2.19624900 | -0.70542900 |
| C | 4.63404500  | -3.23758300 | -1.18081300 |
| C | 6.03006800  | -3.08454200 | -1.60131400 |
| C | 6.48696400  | -1.63545600 | -1.84060300 |
| C | 6.02633400  | -0.74621300 | -0.67789600 |
| C | 4.51300000  | -0.83834100 | -0.32969200 |
| C | 4.57282900  | -0.67176500 | 1.19976400  |
| C | 5.88518900  | -0.96101800 | 1.56205600  |

|   |             |             |             |
|---|-------------|-------------|-------------|
| C | 6.34780500  | -0.97518300 | 2.87054100  |
| C | 5.42206100  | -0.68674500 | 3.88875500  |
| C | 4.10792300  | -0.37088200 | 3.55979600  |
| C | 3.66338500  | -0.34605700 | 2.22457700  |
| O | 5.81309900  | -0.68687500 | 5.18995400  |
| O | 7.62929100  | -1.24439600 | 3.23420500  |
| O | 6.79500300  | -4.00639600 | -1.84068700 |
| O | 5.83502900  | -1.22538800 | -3.02141700 |
| O | 6.33221800  | 0.59187100  | -0.93065800 |
| O | 6.72012400  | -1.21280100 | 0.50214000  |
| H | 3.96676900  | -0.03648600 | -0.82682700 |
| O | 7.87324900  | -1.56085500 | -1.93368700 |
| H | -5.38981200 | 2.29637400  | 0.52466500  |
| H | 5.96113600  | -0.26425800 | -3.08881100 |
| H | -3.46774200 | -0.85757400 | 3.46948000  |
| H | -3.99967600 | -4.92187900 | -2.19024400 |
| H | -7.18202500 | -5.80151600 | -0.90300000 |
| H | -8.15848100 | -3.18817300 | 0.57019500  |
| H | -7.17218300 | 0.73551100  | -0.64303900 |
| H | -7.42715000 | 1.05187300  | 2.70289200  |
| H | 0.69794800  | -0.41237500 | -3.02196600 |
| H | -0.05949200 | -2.48030300 | -1.32564900 |
| H | 0.28163400  | -1.57957200 | 0.98356700  |
| H | 0.04879100  | 1.02255900  | 1.17411100  |
| H | 1.51583400  | 1.26890800  | -1.43080000 |
| H | -1.67041900 | -0.18758000 | -3.77367700 |
| H | -1.03262300 | -1.85640800 | -3.72674600 |
| H | -0.93566000 | 4.32786000  | 0.67299600  |
| H | 1.11182700  | 5.82670700  | -2.82181100 |
| H | -1.97374300 | 7.61158400  | 1.54047000  |
| H | -0.75146100 | 9.40364000  | -0.73905800 |
| H | 0.95217500  | 8.21669600  | -3.08030000 |
| H | 4.17132900  | -4.20800500 | -1.33067800 |
| H | 3.41135900  | -0.12504900 | 4.35179000  |
| H | 6.75569300  | -0.91358700 | 5.22911100  |
| H | 8.17580700  | -1.37711700 | 2.44479800  |
| H | 7.29549100  | 0.64923600  | -1.04892500 |
| H | 8.17715000  | -2.45592300 | -2.17270000 |

Cartesian coordinates of the lowest-energy conformer of amariin [**1-D** (<sup>13</sup>C<sub>4</sub>)] at the B3LYP/6-31G(d,p) level in acetone (PCM).

|   |             |             |             |
|---|-------------|-------------|-------------|
| C | -1.34362000 | -1.41160200 | 1.23390500  |
| O | -0.68035400 | -2.38754600 | 1.50272600  |
| C | -1.97340500 | -2.18552300 | -2.17844600 |
| O | -1.25644900 | -2.68619000 | -3.02595900 |
| C | -2.80823400 | -1.26640500 | 1.53419100  |
| C | -3.16934300 | -1.43537800 | 2.82271300  |
| C | -4.53862600 | -1.17818900 | 3.27074800  |
| C | -5.40732600 | -0.36197500 | 2.29592600  |
| C | -5.24247700 | -0.92283600 | 0.87901000  |
| C | -3.77804100 | -1.02146300 | 0.38352100  |
| C | -3.85898200 | -2.29963300 | -0.45633500 |
| C | -4.96891500 | -2.99323800 | 0.01564300  |
| C | -5.33400600 | -4.25273200 | -0.43875200 |
| C | -4.52107700 | -4.84733700 | -1.42336200 |
| C | -3.42544500 | -4.15864700 | -1.93756900 |
| C | -3.08062200 | -2.87681500 | -1.47321600 |
| O | -4.82837600 | -6.08018500 | -1.90490500 |
| O | -6.41637300 | -4.95271300 | -0.00744200 |
| O | -4.99462900 | -1.48716600 | 4.36277900  |
| O | -4.89262300 | 0.96837600  | 2.24087100  |
| O | -5.98051500 | -0.21483700 | -0.05424000 |
| O | -5.69820500 | -2.30458900 | 0.95622800  |
| H | -3.50054900 | -0.13769200 | -0.18934500 |
| O | -6.73427700 | -0.38356700 | 2.68131800  |
| C | 0.48554300  | 0.02192100  | -2.11155300 |
| C | 0.91621100  | -0.84835800 | -0.92412800 |
| C | 0.56826300  | -0.24616900 | 0.45061900  |
| C | 1.00906500  | 1.21998500  | 0.53741900  |
| C | 0.69349800  | 2.03891300  | -0.71899600 |
| O | 0.93525900  | 1.38063700  | -1.93167300 |
| O | 2.36176800  | -0.84050800 | -1.04642400 |
| O | 2.44539400  | 1.23425900  | 0.68608800  |
| C | -1.00220900 | -0.02931100 | -2.55389900 |
| O | -0.85310200 | -0.27701500 | 0.68627100  |
| O | -0.68264300 | 2.44433500  | -0.59846800 |
| C | -1.00106800 | 3.65646400  | -1.16206600 |
| O | -0.16833900 | 4.35765700  | -1.70570800 |
| C | -2.43689200 | 3.98936100  | -1.04087500 |
| C | -2.87387900 | 5.13608300  | -1.72060500 |
| C | -4.21229500 | 5.50843300  | -1.65930000 |
| C | -5.11027200 | 4.73553600  | -0.91404800 |
| C | -4.67415900 | 3.59175000  | -0.22538300 |
| C | -3.33459700 | 3.21075100  | -0.28599500 |
| O | -4.64580400 | 6.61803500  | -2.32249200 |
| O | -6.41266800 | 5.13321900  | -0.87779900 |
| O | -5.66222700 | 2.95266600  | 0.45787700  |
| O | -1.86247500 | -0.89308100 | -1.78799000 |
| C | 3.12265400  | -1.68662300 | -0.32827600 |
| O | 2.70831200  | -2.58575300 | 0.36932200  |
| C | 2.90916900  | 1.05729700  | 1.95453500  |
| O | 2.17473000  | 1.06096100  | 2.92484900  |
| C | 4.56632200  | -1.37091700 | -0.60822700 |
| C | 5.34927000  | -2.40656500 | -0.96945700 |
| C | 6.67849200  | -2.19126900 | -1.55117400 |
| C | 6.93045700  | -0.77251200 | -2.09302200 |
| C | 6.47849700  | 0.26534000  | -1.05594100 |
| C | 5.02922600  | 0.08169900  | -0.52125900 |
| C | 5.21821600  | 0.50599400  | 0.94660100  |
| C | 6.58625000  | 0.42717800  | 1.19230900  |

|   |             |             |             |
|---|-------------|-------------|-------------|
| C | 7.17476200  | 0.67270800  | 2.42492600  |
| C | 6.32476400  | 1.00767200  | 3.49294600  |
| C | 4.95405100  | 1.10842600  | 3.27957500  |
| C | 4.37921900  | 0.87568600  | 2.01517900  |
| O | 6.83828200  | 1.25805400  | 4.72585100  |
| O | 8.51025500  | 0.61046800  | 2.66930500  |
| O | 7.52745000  | -3.05605600 | -1.70356500 |
| O | 6.12466700  | -0.65962800 | -3.24376600 |
| O | 6.59268300  | 1.55836700  | -1.56774900 |
| O | 7.33860500  | 0.09542500  | 0.09448000  |
| H | 4.34152100  | 0.72705400  | -1.06844600 |
| O | 8.28221200  | -0.57518400 | -2.35803900 |
| H | -5.06667500 | 1.39902100  | 3.09304200  |
| H | 6.12528200  | 0.27943000  | -3.49310500 |
| H | -2.44485500 | -1.73054100 | 3.57480300  |
| H | -2.84164900 | -4.61073100 | -2.73011000 |
| H | -5.62697600 | -6.39784900 | -1.45450700 |
| H | -6.92866000 | -4.42020500 | 0.61947900  |
| H | -6.89095300 | -0.14657200 | 0.27835000  |
| H | -6.75117000 | -0.77247000 | 3.57780400  |
| H | 1.08872100  | -0.32060600 | -2.95452700 |
| H | 0.54738500  | -1.87144900 | -1.00913600 |
| H | 1.05796200  | -0.83054900 | 1.22976700  |
| H | 0.54709800  | 1.69148000  | 1.40470400  |
| H | 1.32012000  | 2.92974200  | -0.74807400 |
| H | -1.43859200 | 0.95995700  | -2.44490200 |
| H | -1.05120700 | -0.33768900 | -3.59842400 |
| H | -2.17344300 | 5.72852500  | -2.29597700 |
| H | -2.98971200 | 2.33912800  | 0.25659300  |
| H | -5.59807400 | 6.71191100  | -2.16338300 |
| H | -6.90069000 | 4.50041800  | -0.32552500 |
| H | -5.34102600 | 2.16434400  | 0.94358100  |
| H | 4.98259000  | -3.42696600 | -0.91745600 |
| H | 4.31319500  | 1.38738400  | 4.10669800  |
| H | 7.80176100  | 1.15036600  | 4.68678100  |
| H | 8.98742300  | 0.41291900  | 1.84910100  |
| H | 7.52523700  | 1.69137100  | -1.80798100 |
| H | 8.67084100  | -1.46344100 | -2.46105700 |



Cartesian coordinates of the lowest-energy conformer of geraniin [2-A (<sup>0,3</sup>B)] at the B3LYP/6-31G(d,p) level in acetone (PCM).

|   |             |             |             |
|---|-------------|-------------|-------------|
| C | -0.19203500 | -0.45766100 | 2.00230000  |
| C | -0.65097300 | -1.15436500 | 0.69368100  |
| C | -0.22255700 | -0.34620100 | -0.55088600 |
| C | -0.66070100 | 1.11337900  | -0.40445300 |
| C | -0.15272100 | 1.70233100  | 0.93390400  |
| O | 0.52176200  | 0.75115700  | 1.73445600  |
| O | -2.10363600 | -1.18484300 | 0.75427600  |
| O | -2.09854000 | 1.20140900  | -0.37748400 |
| C | 0.71781700  | -1.33441300 | 2.87957800  |
| O | 1.20777600  | -0.26089400 | -0.65262800 |
| O | 0.82553100  | 2.66990700  | 0.61365500  |
| C | 1.01643900  | 3.71066200  | 1.48782300  |
| O | 0.26741300  | 3.93432400  | 2.41874500  |
| C | 2.21211300  | 4.50105800  | 1.12796900  |
| C | 2.41426800  | 5.72454800  | 1.78206400  |
| C | 3.53266800  | 6.49194800  | 1.47076100  |
| C | 4.44913400  | 6.03064300  | 0.51591100  |
| C | 4.25032000  | 4.80038300  | -0.12932400 |
| C | 3.12889100  | 4.03404300  | 0.17026900  |
| O | 3.73762800  | 7.68727900  | 2.09441500  |
| O | 5.53260700  | 6.81315400  | 0.24834300  |
| O | 5.21800000  | 4.46817600  | -1.02902100 |
| C | 1.92665600  | -1.32173800 | -1.10754700 |
| O | 1.42669100  | -2.33545500 | 2.12332000  |
| O | 1.42518000  | -2.38361600 | -1.41481000 |
| C | 2.71872600  | -2.11933800 | 1.75536500  |
| C | 3.24476100  | -3.31441900 | 1.02437300  |
| O | 3.33655900  | -1.10939200 | 2.01716700  |
| C | 4.07903100  | -3.18666200 | -0.11205900 |
| C | 4.60526000  | -4.37287900 | -0.64562400 |
| C | 4.32123900  | -5.62550100 | -0.09924300 |
| C | 3.46694100  | -5.72857900 | 1.00070200  |
| C | 2.92751900  | -4.57272400 | 1.55513500  |
| C | 4.38010500  | -1.88074500 | -0.76734700 |
| C | 3.37502600  | -0.96175600 | -1.15759100 |
| C | 3.70424300  | 0.31330400  | -1.64062100 |
| C | 5.03319500  | 0.68703100  | -1.78423200 |
| C | 6.04135100  | -0.22012500 | -1.45610400 |
| C | 5.71628200  | -1.48628400 | -0.95602700 |
| O | 3.24988500  | -6.99966900 | 1.44692800  |
| O | 4.89607200  | -6.70953400 | -0.69254900 |
| O | 5.44554800  | -4.31118300 | -1.73289200 |
| O | 6.80226900  | -2.26218800 | -0.63693800 |
| O | 7.33289400  | 0.16023400  | -1.63909600 |
| O | 5.36263600  | 1.92975700  | -2.27298200 |
| C | -2.75833700 | -1.91783400 | -0.15993300 |
| O | -2.22421200 | -2.64493500 | -0.97274300 |
| C | -2.74809000 | 1.24478200  | -1.56976600 |
| O | -2.17631000 | 1.24051600  | -2.64142800 |
| C | -4.25028700 | -1.77324200 | -0.01855500 |
| C | -4.92886600 | -2.91751100 | -0.24250600 |
| C | -6.35354800 | -3.05389900 | 0.04937500  |
| C | -7.15568000 | -1.75761500 | 0.21064600  |
| C | -6.33941400 | -0.68654100 | 0.98955100  |
| C | -4.86556100 | -0.48060900 | 0.49850000  |
| C | -5.01424300 | 0.73735300  | -0.43418800 |
| C | -6.29781100 | 1.23343500  | -0.20839900 |
| C | -6.85600800 | 2.29726200  | -0.90300000 |
| C | -6.07274000 | 2.91833700  | -1.88622700 |

|   |             |             |             |
|---|-------------|-------------|-------------|
| C | -4.76864700 | 2.48133400  | -2.10620900 |
| C | -4.21301500 | 1.42254700  | -1.36348200 |
| O | -6.57334000 | 3.95206200  | -2.61527200 |
| O | -8.11952700 | 2.76575300  | -0.69502700 |
| O | -6.93235000 | -4.13070400 | 0.13171100  |
| O | -8.32760800 | -2.01971600 | 0.92553800  |
| O | -6.33996800 | -1.00149300 | 2.32873000  |
| O | -7.00713500 | 0.57950700  | 0.76008400  |
| H | -4.28528700 | -0.18817300 | 1.38279100  |
| O | -7.40058400 | -1.26015000 | -1.08286500 |
| H | -1.09350200 | -0.22398800 | 2.58518500  |
| H | -0.28262500 | -2.17517800 | 0.61272100  |
| H | -0.63477600 | -0.80204800 | -1.45154600 |
| H | -0.27589900 | 1.69779500  | -1.24081400 |
| H | -0.97908300 | 2.16298300  | 1.48673600  |
| H | 1.42004800  | -0.69788100 | 3.41937700  |
| H | 0.10745300  | -1.90108500 | 3.58400500  |
| H | 1.70541700  | 6.07532400  | 2.52231400  |
| H | 2.97354900  | 3.07902700  | -0.31485700 |
| H | 4.56286300  | 8.06705900  | 1.75427100  |
| H | 6.07861800  | 6.35496900  | -0.41100800 |
| H | 5.08694200  | 3.56970500  | -1.39375000 |
| H | 2.27547300  | -4.64173500 | 2.41844100  |
| H | 2.92434600  | 1.00441800  | -1.93507000 |
| H | 2.66660700  | -6.99692800 | 2.21854700  |
| H | 4.59763100  | -7.51210200 | -0.23654200 |
| H | 5.70305400  | -5.21740200 | -1.97197900 |
| H | 6.65899200  | -3.14570400 | -1.03434800 |
| H | 7.88959100  | -0.60673100 | -1.41697500 |
| H | 6.32313500  | 1.94639900  | -2.42136100 |
| H | -4.39868300 | -3.81501600 | -0.54248600 |
| H | -4.16038600 | 2.99825300  | -2.83875200 |
| H | -7.48952100 | 4.10675600  | -2.33574500 |
| H | -8.58776300 | 2.16714700  | -0.09323800 |
| H | -8.45608000 | -2.98766000 | 0.88204600  |
| H | -7.21839400 | -1.37681900 | 2.52387500  |
| H | -7.95814600 | -1.89951500 | -1.55243500 |

Cartesian coordinates of the lowest-energy conformer of geraniin [2-A (<sup>13</sup>C<sub>4</sub>)] at the B3LYP/6-31G(d,p) level in acetone (PCM).

|   |             |             |             |
|---|-------------|-------------|-------------|
| C | -0.27965300 | -0.19441800 | -2.03362100 |
| C | -0.72259300 | 0.66195700  | -0.84101700 |
| C | -0.39911700 | 0.02165200  | 0.52127100  |
| C | -0.91571600 | -1.42544500 | 0.56979600  |
| C | -0.57854600 | -2.23274200 | -0.69320800 |
| O | -0.76458200 | -1.54790700 | -1.90723200 |
| O | -2.16431400 | 0.69821000  | -0.99868700 |
| O | -2.35364900 | -1.38639100 | 0.67952300  |
| C | 1.22994100  | -0.18708500 | -2.35350100 |
| O | 1.02470800  | -0.04267800 | 0.73536000  |
| O | 0.78784200  | -2.62495400 | -0.53555400 |
| C | 1.18843500  | -3.86543000 | -0.96579900 |
| O | 0.40565200  | -4.74231900 | -1.27532500 |
| C | 2.66382000  | -3.94972900 | -1.01456100 |
| C | 3.26779100  | -5.14448800 | -1.43438100 |
| C | 4.65199500  | -5.19882300 | -1.57302500 |
| C | 5.42886100  | -4.05426100 | -1.32505500 |
| C | 4.81907600  | -2.86354400 | -0.91024300 |
| C | 3.44392200  | -2.82089500 | -0.72162000 |
| O | 5.25158000  | -6.35285400 | -1.98343500 |
| O | 6.77367800  | -4.14765800 | -1.52113900 |
| O | 5.64935100  | -1.79398600 | -0.71494400 |
| C | 1.64944300  | 1.09186600  | 1.17700800  |
| O | 1.75075800  | 1.13378400  | -2.08179400 |
| O | 1.08243000  | 2.15882700  | 1.27403000  |
| C | 2.99283200  | 1.21718000  | -1.55203900 |
| C | 3.29177900  | 2.59512800  | -1.07547500 |
| O | 3.74586900  | 0.25938500  | -1.47635900 |
| C | 3.91822100  | 2.79843100  | 0.17907700  |
| C | 4.27721200  | 4.11652700  | 0.50692200  |
| C | 3.98453000  | 5.18413600  | -0.34851900 |
| C | 3.31193800  | 4.96785600  | -1.55631300 |
| C | 2.96820800  | 3.66794100  | -1.91507600 |
| C | 4.11390000  | 1.69046700  | 1.15624800  |
| C | 3.07099800  | 0.81191100  | 1.53748800  |
| C | 3.31488400  | -0.30508600 | 2.34910100  |
| C | 4.59402000  | -0.54529000 | 2.84199000  |
| C | 5.63011900  | 0.33652800  | 2.52157900  |
| C | 5.38600400  | 1.42729400  | 1.68421100  |
| O | 3.02460600  | 6.00631000  | -2.38730000 |
| O | 4.33442000  | 6.46057200  | -0.03208200 |
| O | 4.89282100  | 4.47656000  | 1.67959400  |
| O | 6.42969600  | 2.26558600  | 1.37491000  |
| O | 6.90286300  | 0.17450100  | 2.97774800  |
| O | 4.95113500  | -1.58129200 | 3.65369200  |
| C | -2.91593600 | 1.54627500  | -0.27631800 |
| O | -2.49477100 | 2.40802700  | 0.46377200  |
| C | -2.84781600 | -1.24190300 | 1.94014600  |
| O | -2.14303100 | -1.30315300 | 2.93033900  |
| C | -4.36084300 | 1.28877500  | -0.60586600 |
| C | -5.10057000 | 2.35764000  | -0.96148100 |
| C | -6.41986400 | 2.19901100  | -1.58216800 |
| C | -6.70268200 | 0.80237900  | -2.16486600 |
| C | -6.31135100 | -0.27428300 | -1.14286700 |
| C | -4.87217800 | -0.14911700 | -0.56638000 |
| C | -5.11292000 | -0.60027900 | 0.88569200  |
| C | -6.48423600 | -0.48703000 | 1.09707800  |
| C | -7.11293500 | -0.74567100 | 2.30695000  |
| C | -6.30212000 | -1.13197000 | 3.38801100  |

|   |             |             |             |
|---|-------------|-------------|-------------|
| C | -4.92942400 | -1.26674900 | 3.20859700  |
| C | -4.31373000 | -1.01934800 | 1.96647500  |
| O | -6.85546300 | -1.39841300 | 4.60027000  |
| O | -8.45239400 | -0.65012100 | 2.51698300  |
| O | -7.23700300 | 3.09391600  | -1.73578800 |
| O | -5.87070200 | 0.69076800  | -3.29718800 |
| O | -6.45156100 | -1.55028800 | -1.69029500 |
| O | -7.19659800 | -0.10597300 | -0.01153000 |
| H | -4.19002700 | -0.80348400 | -1.10980100 |
| O | -8.05243900 | 0.65567500  | -2.46961300 |
| H | -0.82450400 | 0.19340400  | -2.89740400 |
| H | -0.31796500 | 1.67174000  | -0.89656400 |
| H | -0.84984300 | 0.61317800  | 1.31937900  |
| H | -0.49950900 | -1.93456900 | 1.43892400  |
| H | -1.20746200 | -3.12127700 | -0.75923100 |
| H | 1.76487900  | -0.91345500 | -1.75333700 |
| H | 1.38294600  | -0.41993000 | -3.40993300 |
| H | 2.66688300  | -6.01548000 | -1.66727300 |
| H | 2.98860500  | -1.90892700 | -0.36660900 |
| H | 6.20501700  | -6.18927700 | -2.05537700 |
| H | 7.15760100  | -3.26465300 | -1.39375200 |
| H | 5.13573100  | -0.97101300 | -0.82155500 |
| H | 2.47598300  | 3.49602600  | -2.86475400 |
| H | 2.49814700  | -0.96642400 | 2.61696000  |
| H | 3.34964800  | 6.82232500  | -1.97518500 |
| H | 4.81748700  | 6.42249300  | 0.81155800  |
| H | 5.64318200  | 3.86443700  | 1.82111100  |
| H | 7.22958500  | 1.93906300  | 1.82003300  |
| H | 6.94350200  | -0.63014600 | 3.51837900  |
| H | 4.19569000  | -2.16007700 | 3.82648900  |
| H | -4.70381800 | 3.36428400  | -0.87372700 |
| H | -4.31954900 | -1.58446700 | 4.04509400  |
| H | -7.81431100 | -1.26352100 | 4.53882000  |
| H | -8.90071600 | -0.41916500 | 1.68924900  |
| H | -5.89823500 | -0.24079800 | -3.57184500 |
| H | -7.38117700 | -1.64803900 | -1.95724100 |
| H | -8.40917700 | 1.55847700  | -2.56151700 |

Cartesian coordinates of the lowest-energy conformer of geraniin [**2-B** ( $^0_3\mathbf{B}$ )] at the B3LYP/6-31G(d,p) level in acetone (PCM).

|   |             |             |             |
|---|-------------|-------------|-------------|
| C | 0.00957800  | -0.71855300 | -2.44162400 |
| C | 0.64647100  | -1.53071400 | -1.28010500 |
| C | 0.18329500  | -1.00224900 | 0.09166900  |
| C | 0.46554900  | 0.51095900  | 0.19968000  |
| C | 0.03656300  | 1.25078400  | -1.08679900 |
| O | -0.70991100 | 0.41410300  | -1.94813000 |
| O | 2.07152100  | -1.28565100 | -1.38367700 |
| O | 1.88559300  | 0.66446200  | 0.39193100  |
| C | -0.95347700 | -1.54189100 | -3.30463600 |
| O | -1.23564800 | -1.24061700 | 0.18024800  |
| O | -0.85253700 | 2.27786500  | -0.69627800 |
| C | -0.94228300 | 3.38985200  | -1.49657800 |
| O | -0.19022000 | 3.58709800  | -2.43120600 |
| C | -2.03173400 | 4.28817900  | -1.05973400 |
| C | -2.11261600 | 5.55247400  | -1.66083100 |
| C | -3.12317500 | 6.43035400  | -1.28159300 |
| C | -4.05409900 | 6.03900500  | -0.31020800 |
| C | -3.97784900 | 4.76964300  | 0.28422300  |
| C | -2.96321500 | 3.89109400  | -0.08378800 |
| O | -3.21004700 | 7.66403300  | -1.85651100 |
| O | -5.03207800 | 6.92676500  | 0.02494300  |
| O | -4.94585300 | 4.52541500  | 1.21188500  |
| C | -1.82378600 | -1.00300800 | 1.38674900  |
| O | -1.59511500 | -2.57564700 | -2.54057400 |
| O | -1.18451300 | -0.81980000 | 2.40284900  |
| C | -2.80410500 | -2.32493500 | -1.97432300 |
| C | -3.15194600 | -3.41768800 | -1.02109400 |
| O | -3.48193300 | -1.35074300 | -2.22305600 |
| C | -3.80221000 | -3.10928400 | 0.19307300  |
| C | -4.09321900 | -4.17203900 | 1.06979200  |
| C | -3.76006100 | -5.49067100 | 0.73855700  |
| C | -3.11024300 | -5.77089200 | -0.46604100 |
| C | -2.79598000 | -4.73424600 | -1.34024200 |
| C | -4.17937100 | -1.72858800 | 0.63149700  |
| C | -3.30351800 | -0.82728600 | 1.26991700  |
| C | -3.77393400 | 0.38077100  | 1.80624000  |
| C | -5.11057400 | 0.73090600  | 1.66240100  |
| C | -5.99425700 | -0.13628500 | 1.01979000  |
| C | -5.52913400 | -1.36146800 | 0.53196500  |
| O | -2.83348400 | -7.09077100 | -0.67642600 |
| O | -4.08429200 | -6.46100200 | 1.64072600  |
| O | -4.70129600 | -3.91710900 | 2.25907900  |
| O | -6.49103000 | -2.14508500 | -0.03681000 |
| O | -7.29730800 | 0.24874600  | 0.90989100  |
| O | -5.56363600 | 1.93856800  | 2.13925300  |
| C | 2.91665900  | -2.01624000 | -0.63335500 |
| O | 2.61272100  | -3.01891500 | -0.02200800 |
| C | 2.33188400  | 1.15765300  | 1.57875300  |
| O | 1.58437700  | 1.64514000  | 2.40484100  |
| C | 4.29954700  | -1.43224400 | -0.69245800 |
| C | 5.33006700  | -2.29471400 | -0.80805300 |
| C | 6.68560700  | -1.80610400 | -1.06406500 |
| C | 6.90849600  | -0.28109600 | -0.95951600 |
| C | 5.69368800  | 0.49646800  | -1.48555000 |
| C | 4.48137900  | 0.08455200  | -0.63107100 |
| C | 4.73857900  | 0.50935500  | 0.81938200  |
| C | 6.07236000  | 0.41547300  | 1.23775600  |
| C | 6.49183300  | 0.77006000  | 2.52384400  |
| C | 5.55816500  | 1.25433400  | 3.44412600  |

|   |             |             |             |
|---|-------------|-------------|-------------|
| C | 4.23076500  | 1.36764800  | 3.05648000  |
| C | 3.80276600  | 1.00132800  | 1.76898700  |
| O | 5.94035900  | 1.61488000  | 4.69833100  |
| O | 7.78764700  | 0.67762000  | 2.91980200  |
| O | 7.63811200  | -2.51598600 | -1.35787700 |
| O | 8.04291600  | 0.08508300  | -1.64486400 |
| O | 7.11196200  | -0.01907700 | 0.44527000  |
| O | 5.87471700  | 1.87818900  | -1.35138500 |
| O | 5.44842800  | 0.10825400  | -2.81411200 |
| H | 3.60191100  | 0.57929200  | -1.03286700 |
| H | 0.82790600  | -0.37218300 | -3.08822600 |
| H | 0.45081900  | -2.59908700 | -1.36449600 |
| H | 0.69729100  | -1.52626700 | 0.89834200  |
| H | -0.05016100 | 0.93310200  | 1.06004600  |
| H | 0.90336400  | 1.67440100  | -1.60719200 |
| H | -1.69384300 | -0.88260100 | -3.75995500 |
| H | -0.39225600 | -2.06605900 | -4.07949700 |
| H | -1.39242100 | 5.84792600  | -2.41406400 |
| H | -2.90042400 | 2.90792400  | 0.36555800  |
| H | -3.97428200 | 8.12222500  | -1.47318500 |
| H | -5.60965600 | 6.50122800  | 0.67967200  |
| H | -4.96674600 | 3.58869200  | 1.49471000  |
| H | -2.28239000 | -4.94574400 | -2.27110700 |
| H | -3.09648000 | 1.05421300  | 2.31770500  |
| H | -2.33722100 | -7.20940900 | -1.49818500 |
| H | -3.75886300 | -7.31365700 | 1.31184500  |
| H | -4.81264400 | -4.76071200 | 2.72645200  |
| H | -6.07588200 | -2.92211600 | -0.44263100 |
| H | -7.78740500 | -0.44582700 | 0.44218600  |
| H | -6.52663700 | 1.97089300  | 2.01207600  |
| H | 5.17016100  | -3.36746900 | -0.82514300 |
| H | 3.50252000  | 1.74228100  | 3.76420500  |
| H | 6.89711000  | 1.47551900  | 4.77864800  |
| H | 8.31871300  | 0.35288000  | 2.17460000  |
| H | 8.58877700  | -0.72233200 | -1.72555000 |
| H | 6.74833500  | 2.10523900  | -1.70688400 |
| H | 6.27999100  | 0.20691200  | -3.30546400 |

Cartesian coordinates of the lowest-energy conformer of geraniin [**2-B** ( $^1C_4$ )] at the B3LYP/6-31G(d,p) level in acetone (PCM).

|   |             |             |             |
|---|-------------|-------------|-------------|
| C | -0.14593400 | 0.04391900  | -2.19462700 |
| C | -0.66662500 | 0.84600100  | -0.99802900 |
| C | -0.34309100 | 0.17475600  | 0.34983600  |
| C | -0.80200600 | -1.29297500 | 0.34784300  |
| C | -0.45667200 | -2.05097400 | -0.94535500 |
| O | -0.59466500 | -1.32253900 | -2.13663400 |
| O | -2.10347300 | 0.81630500  | -1.16833300 |
| O | -2.24018400 | -1.31415300 | 0.47310800  |
| C | 1.37522400  | 0.10798300  | -2.41672500 |
| O | 1.07735400  | 0.14877800  | 0.57276400  |
| O | 0.88476300  | -2.54022600 | -0.76450500 |
| C | 1.19213000  | -3.71429800 | -1.40427000 |
| O | 0.40467900  | -4.27829300 | -2.14096000 |
| C | 2.55174100  | -4.20137800 | -1.08327900 |
| C | 2.99213400  | -5.34527700 | -1.76507700 |
| C | 4.25011900  | -5.87110600 | -1.49150600 |
| C | 5.05997200  | -5.25931900 | -0.52675400 |
| C | 4.61863800  | -4.11669100 | 0.15975600  |
| C | 3.36526900  | -3.57742400 | -0.11945200 |
| O | 4.68692500  | -6.98142500 | -2.15180300 |
| O | 6.28003800  | -5.81226500 | -0.27891200 |
| O | 5.51856800  | -3.63791900 | 1.06481500  |
| C | 1.67383200  | 1.30263500  | 1.00638900  |
| O | 1.78052600  | 1.47303300  | -2.17167000 |
| O | 1.06568900  | 2.34375000  | 1.14041600  |
| C | 3.04835600  | 1.65382700  | -1.72379400 |
| C | 3.24082200  | 3.03456000  | -1.18175400 |
| O | 3.89316100  | 0.78345600  | -1.74832000 |
| C | 3.81348900  | 3.21305500  | 0.09880400  |
| C | 4.08864000  | 4.52870300  | 0.49405900  |
| C | 3.78251900  | 5.62187000  | -0.31814800 |
| C | 3.16673700  | 5.42088000  | -1.55729200 |
| C | 2.89468400  | 4.12449900  | -1.98759400 |
| C | 4.09303800  | 2.06052200  | 1.00203900  |
| C | 3.11632100  | 1.07541700  | 1.29641600  |
| C | 3.46516000  | -0.12229200 | 1.93305100  |
| C | 4.77752100  | -0.34769500 | 2.32350700  |
| C | 5.73822700  | 0.64584600  | 2.12949500  |
| C | 5.39479700  | 1.83858000  | 1.47880400  |
| O | 2.89926000  | 6.55978000  | -2.25928600 |
| O | 4.09490700  | 6.86062300  | 0.15873100  |
| O | 4.69218100  | 4.75081100  | 1.70898000  |
| O | 6.43861600  | 2.70638000  | 1.29738800  |
| O | 7.00264300  | 0.41291200  | 2.56669100  |
| O | 5.12027900  | -1.54454600 | 2.90684000  |
| C | -2.88215600 | 1.69624000  | -0.51398900 |
| O | -2.48627600 | 2.67140900  | 0.08743500  |
| C | -2.73737200 | -1.32493600 | 1.74199200  |
| O | -2.02111700 | -1.50398400 | 2.70998300  |
| C | -4.32162700 | 1.29298500  | -0.66953100 |
| C | -5.23880100 | 2.26442300  | -0.85213900 |
| C | -6.62481500 | 1.92927200  | -1.19086200 |
| C | -7.02524000 | 0.43849400  | -1.10765300 |
| C | -5.87046900 | -0.46863600 | -1.56121600 |
| C | -4.67354800 | -0.19286300 | -0.62418300 |
| C | -5.04635200 | -0.56798800 | 0.81089900  |
| C | -6.38309900 | -0.32953900 | 1.14893400  |
| C | -6.90415600 | -0.60632800 | 2.41703900  |
| C | -6.06726300 | -1.13163100 | 3.40602400  |

|   |             |             |             |
|---|-------------|-------------|-------------|
| C | -4.73046400 | -1.35394300 | 3.10712200  |
| C | -4.20464800 | -1.08395300 | 1.83167000  |
| O | -6.54940100 | -1.41730000 | 4.64509900  |
| O | -8.20612400 | -0.38667800 | 2.73355800  |
| O | -7.47118300 | 2.74383100  | -1.53302200 |
| O | -8.16931400 | 0.20311000  | -1.82121500 |
| O | -7.31980300 | 0.19633400  | 0.29177700  |
| O | -6.19573400 | -1.82430800 | -1.45840600 |
| O | -5.60735200 | -0.08806700 | -2.88756700 |
| H | -3.82733700 | -0.78334300 | -0.96661900 |
| H | -0.65008300 | 0.44632700  | -3.07693500 |
| H | -0.30783600 | 1.87342100  | -1.01390600 |
| H | -0.82597000 | 0.72278000  | 1.16187900  |
| H | -0.35905800 | -1.81614200 | 1.19448300  |
| H | -1.12376600 | -2.90542800 | -1.05884200 |
| H | 1.91073600  | -0.55267700 | -1.73861600 |
| H | 1.61302700  | -0.17275500 | -3.44579100 |
| H | 2.35531000  | -5.82022700 | -2.50109700 |
| H | 3.02296200  | -2.68962000 | 0.39733100  |
| H | 5.57403300  | -7.19787300 | -1.82453300 |
| H | 6.70256900  | -5.29564000 | 0.42686400  |
| H | 5.15816100  | -2.93290500 | 1.63844500  |
| H | 2.44177700  | 3.95991500  | -2.95951700 |
| H | 2.71194900  | -0.86898100 | 2.15152700  |
| H | 2.48804800  | 6.34964600  | -3.10932700 |
| H | 3.81554800  | 7.52587200  | -0.48958900 |
| H | 4.81176100  | 5.70844700  | 1.82353900  |
| H | 6.11721500  | 3.61012800  | 1.49415600  |
| H | 7.52175800  | 1.21703300  | 2.39194700  |
| H | 6.03866100  | -1.48076500 | 3.21851800  |
| H | -4.95889900 | 3.31249700  | -0.85460300 |
| H | -4.07425600 | -1.74030200 | 3.87634200  |
| H | -7.49472200 | -1.20001200 | 4.66353900  |
| H | -8.66208400 | -0.03987200 | 1.94941100  |
| H | -8.59949900 | 1.07242600  | -1.94076300 |
| H | -6.98870800 | -1.96494500 | -2.00044000 |
| H | -4.86120200 | -0.61879200 | -3.20570500 |



Cartesian coordinates of the lowest-energy conformer of 3,6-dimethoxyfurosin [**fr**—**A** (<sup>0,3</sup>**B**)] at the B3LYP/6-31G(d,p) level in acetone (PCM).

|   |             |             |             |
|---|-------------|-------------|-------------|
| C | 1.20595100  | 3.37621300  | -0.47903300 |
| C | -0.04777800 | 3.19102200  | 0.39869400  |
| C | 0.30372200  | 2.43768500  | 1.69054000  |
| C | 0.86122300  | 1.03834600  | 1.32405800  |
| C | 1.65658800  | 1.08477400  | 0.00888300  |
| O | 2.19370800  | 2.37594400  | -0.19420700 |
| O | -0.93611400 | 2.36665300  | -0.42368100 |
| O | -0.23821200 | 0.11544900  | 1.11396200  |
| C | 1.89305800  | 4.72419000  | -0.27734100 |
| O | 1.26495600  | 3.20803400  | 2.38597800  |
| O | 2.75646000  | 0.20246500  | 0.13251600  |
| C | 3.26815800  | -0.31378300 | -1.03006700 |
| O | 2.78581200  | -0.07691400 | -2.12137400 |
| C | 4.44175400  | -1.18030100 | -0.78896300 |
| C | 4.95895300  | -1.39156800 | 0.49737400  |
| C | 6.06793700  | -2.21729300 | 0.66318300  |
| C | 6.65764200  | -2.82864500 | -0.45159600 |
| C | 6.13526800  | -2.61306100 | -1.73496600 |
| C | 5.02974200  | -1.79092800 | -1.90928500 |
| O | 6.57810700  | -2.42920100 | 1.90905300  |
| O | 7.74053800  | -3.62596500 | -0.23372000 |
| O | 6.80061700  | -3.26678500 | -2.73583700 |
| O | 0.98973100  | 5.72297200  | -0.71496600 |
| C | -2.08095800 | 1.86285500  | 0.06253900  |
| O | -2.59757100 | 2.13873100  | 1.12378300  |
| C | -0.86787300 | -0.33138500 | 2.23239800  |
| O | -0.42854500 | -0.13179600 | 3.35153500  |
| C | -2.67834400 | 0.89621300  | -0.92276000 |
| C | -3.20357200 | 1.42254200  | -2.04564400 |
| C | -3.86845900 | 0.58786800  | -3.04255700 |
| C | -4.46929600 | -0.72284000 | -2.51060900 |
| C | -3.45693000 | -1.48222500 | -1.59459100 |
| C | -2.52402000 | -0.60683500 | -0.68471800 |
| C | -2.75869800 | -1.19856200 | 0.70199200  |
| C | -3.80970500 | -2.10615900 | 0.58426100  |
| C | -4.32089500 | -2.84272000 | 1.64898700  |
| C | -3.70615700 | -2.66872900 | 2.90124800  |
| C | -2.60940200 | -1.82939900 | 3.03794500  |
| C | -2.10249900 | -1.10037300 | 1.94477300  |
| O | -4.25845700 | -3.40835000 | 3.90727700  |
| O | -5.35868000 | -3.69279900 | 1.46557000  |
| O | -4.03582400 | 0.89012400  | -4.21552600 |
| O | -4.78385000 | -1.56775600 | -3.58462300 |
| O | -2.65794000 | -2.31703500 | -2.34623500 |
| O | -4.29937900 | -2.25095600 | -0.68508000 |
| H | -1.49960500 | -0.83212000 | -1.00467900 |
| O | -5.59583200 | -0.31326100 | -1.79003100 |
| C | 1.18505900  | 3.07759500  | 3.80555900  |
| C | 1.50280300  | 7.03472600  | -0.54292000 |
| H | 0.88795700  | 3.29776500  | -1.52763800 |
| H | -0.53187100 | 4.14747400  | 0.60135700  |
| H | -0.59455500 | 2.31252300  | 2.29781300  |
| H | 1.49208100  | 0.67475500  | 2.13562500  |
| H | 1.03767400  | 0.78315500  | -0.84099700 |
| H | 2.15735400  | 4.85720000  | 0.77920800  |
| H | 2.81976700  | 4.73674400  | -0.87065100 |
| H | 4.51309900  | -0.92311400 | 1.36505800  |
| H | 4.61497700  | -1.61573300 | -2.89582200 |

|   |             |             |             |
|---|-------------|-------------|-------------|
| H | 7.33934600  | -3.02498400 | 1.82761000  |
| H | 8.04168500  | -3.97930900 | -1.08577500 |
| H | 6.39125700  | -3.08036400 | -3.59202900 |
| H | -3.12780000 | 2.48448000  | -2.25823900 |
| H | -2.10962100 | -1.73729500 | 3.99573700  |
| H | -3.78629100 | -3.26058200 | 4.73834700  |
| H | -5.55476900 | -4.10894400 | 2.32099900  |
| H | -4.81089100 | -0.99175700 | -4.37363700 |
| H | -3.20026500 | -2.59094100 | -3.11041600 |
| H | -5.82422100 | -1.05269800 | -1.20037700 |
| H | 0.23228800  | 3.46959900  | 4.18478600  |
| H | 1.28749000  | 2.03385500  | 4.12423400  |
| H | 2.00704600  | 3.66411700  | 4.21910300  |
| H | 1.72037700  | 7.24806200  | 0.51343500  |
| H | 2.42302300  | 7.18677600  | -1.12517800 |
| H | 0.73863100  | 7.72954400  | -0.89734500 |

Cartesian coordinates of the lowest-energy conformer of 3,6-dimethoxyfurosin [**fro-A** ( $^1C_4$ )] at the B3LYP/6-31G(d,p) level in acetone (PCM).

|   |             |             |             |
|---|-------------|-------------|-------------|
| C | -1.10752000 | -2.19140700 | -0.91702200 |
| C | -0.36490200 | -2.11283900 | 0.41631200  |
| C | -0.88369000 | -0.98170700 | 1.33152800  |
| C | -0.93524000 | 0.33459000  | 0.54660700  |
| C | -1.60078600 | 0.20212100  | -0.83101800 |
| O | -1.19565000 | -0.90654600 | -1.56407900 |
| O | 1.01721300  | -1.82877400 | 0.04950100  |
| O | 0.41724300  | 0.76449200  | 0.26181800  |
| C | -2.47441900 | -2.88093300 | -0.82996300 |
| O | -2.18853700 | -1.25391200 | 1.80704000  |
| O | -3.03971900 | 0.14754800  | -0.67132400 |
| C | -3.68348100 | 1.33977600  | -0.55886700 |
| O | -3.08591100 | 2.40347900  | -0.51625900 |
| C | -5.15562700 | 1.19603100  | -0.49102100 |
| C | -5.90954800 | 2.36529500  | -0.31844500 |
| C | -7.29669700 | 2.28914400  | -0.24498500 |
| C | -7.93044500 | 1.04300300  | -0.34510000 |
| C | -7.17212400 | -0.12282900 | -0.51957900 |
| C | -5.78512700 | -0.05568600 | -0.59345400 |
| O | -8.03600900 | 3.42114200  | -0.07455500 |
| O | -9.29065100 | 1.01919300  | -0.26622700 |
| O | -7.91175300 | -1.27114600 | -0.60532600 |
| O | -2.23040600 | -4.21304400 | -0.40743300 |
| C | 1.95420100  | -1.88144000 | 1.00324900  |
| O | 1.77366800  | -2.27757500 | 2.13771300  |
| C | 1.07468600  | 1.43466600  | 1.23960200  |
| O | 0.57062800  | 1.72417800  | 2.30780800  |
| C | 3.29776100  | -1.46053300 | 0.46587300  |
| C | 4.29858000  | -2.29209900 | 0.82249100  |
| C | 5.61988100  | -2.23510400 | 0.20837000  |
| C | 5.99784700  | -0.93779800 | -0.51392900 |
| C | 4.78966000  | -0.31374700 | -1.28636800 |
| C | 3.41340600  | -0.31441800 | -0.53285900 |
| C | 3.31179400  | 1.13760400  | -0.03054000 |
| C | 4.38586800  | 1.82626500  | -0.59607500 |
| C | 4.68596000  | 3.15767600  | -0.32393200 |
| C | 3.84018300  | 3.83906700  | 0.56539300  |
| C | 2.72554600  | 3.20422700  | 1.10023600  |
| C | 2.42295500  | 1.86683000  | 0.77917200  |
| O | 4.20173900  | 5.13206100  | 0.81349700  |
| O | 5.77033700  | 3.74589500  | -0.88952600 |
| O | 6.42557600  | -3.15511800 | 0.23830600  |
| O | 6.99446500  | -1.20014000 | -1.46376700 |
| O | 4.63476000  | -0.92483600 | -2.50814300 |
| O | 5.15935400  | 1.08659600  | -1.44767200 |
| H | 2.64378300  | -0.48776200 | -1.29506000 |
| O | 6.43931600  | -0.09811300 | 0.51811600  |
| C | -2.23120500 | -2.09662200 | 2.95882400  |
| C | -3.41978200 | -4.98049500 | -0.30869800 |
| H | -0.48782400 | -2.78380400 | -1.59584700 |
| H | -0.40841200 | -3.07918200 | 0.92100900  |
| H | -0.19601700 | -0.85268100 | 2.17314100  |
| H | -1.44275700 | 1.09886500  | 1.13501200  |
| H | -1.35535700 | 1.07951800  | -1.43087700 |
| H | -3.13860300 | -2.36303300 | -0.13029100 |
| H | -2.93192400 | -2.85855600 | -1.83048700 |
| H | -5.41536400 | 3.32580000  | -0.23991600 |
| H | -5.20139100 | -0.95795900 | -0.73246400 |
| H | -8.97231800 | 3.16925100  | -0.04344400 |

|   |             |             |             |
|---|-------------|-------------|-------------|
| H | -9.58910000 | 0.09908800  | -0.34257900 |
| H | -7.33366900 | -2.03914000 | -0.70934400 |
| H | 4.10183900  | -3.12811700 | 1.48526400  |
| H | 2.04528700  | 3.75338600  | 1.74222000  |
| H | 3.58420200  | 5.54827300  | 1.43069600  |
| H | 5.81556600  | 4.65834000  | -0.56046800 |
| H | 7.44220900  | -2.01325100 | -1.16109200 |
| H | 5.52831600  | -1.19105000 | -2.79496100 |
| H | 6.67089600  | 0.74792100  | 0.10065800  |
| H | -1.88054800 | -3.11232900 | 2.74025300  |
| H | -1.63015400 | -1.67813700 | 3.77592600  |
| H | -3.27649700 | -2.14390200 | 3.26821300  |
| H | -3.92749500 | -5.06270100 | -1.28053300 |
| H | -3.13356000 | -5.97884500 | 0.02857600  |
| H | -4.12281300 | -4.54485800 | 0.41565600  |

Cartesian coordinates of the lowest-energy conformer of 3,6-dimethoxyfurosin [**fro-B** ( $^{13}\text{C}$ )] at the B3LYP/6-31G(d,p) level in acetone (PCM).

|   |             |             |             |
|---|-------------|-------------|-------------|
| C | 1.05934100  | 3.24637700  | -0.49028200 |
| C | -0.16624100 | 3.00003600  | 0.40988900  |
| C | 0.21461100  | 2.21537000  | 1.67421900  |
| C | 0.87379300  | 0.86779200  | 1.27314700  |
| C | 1.70840900  | 1.01452600  | -0.01046400 |
| O | 2.13201800  | 2.34866900  | -0.18098800 |
| O | -1.07926800 | 2.14875100  | -0.34182500 |
| O | -0.15391200 | -0.10106100 | 0.97024000  |
| C | 1.63146400  | 4.65164400  | -0.32194900 |
| O | 1.09543500  | 3.01517600  | 2.43413200  |
| O | 2.87534500  | 0.22868300  | 0.13660600  |
| C | 3.47984800  | -0.20500300 | -1.01531500 |
| O | 3.02492200  | 0.02292400  | -2.12025300 |
| C | 4.71354000  | -0.97290900 | -0.74355500 |
| C | 5.18355500  | -1.18697800 | 0.56038700  |
| C | 6.35159500  | -1.91911500 | 0.75661400  |
| C | 7.04703900  | -2.43443300 | -0.34561000 |
| C | 6.57202800  | -2.21570200 | -1.64684200 |
| C | 5.40750500  | -1.48730200 | -1.85166200 |
| O | 6.81646300  | -2.13276100 | 2.01966500  |
| O | 8.18380300  | -3.14295900 | -0.09812300 |
| O | 7.34271500  | -2.77032900 | -2.63176100 |
| O | 0.64858500  | 5.56329500  | -0.77425000 |
| C | -2.37187100 | 2.11257600  | 0.03487800  |
| O | -2.89054600 | 2.88959300  | 0.80893600  |
| C | -0.76910000 | -0.71300000 | 2.01111900  |
| O | -0.31861600 | -0.67538400 | 3.14298800  |
| C | -3.09587500 | 0.98665900  | -0.65029600 |
| C | -4.34250100 | 1.22990200  | -1.10424700 |
| C | -5.05832500 | 0.23261500  | -1.90346500 |
| C | -4.42381200 | -1.17276400 | -1.99362300 |
| C | -2.89200700 | -1.07493500 | -2.07220700 |
| C | -2.40850400 | -0.37124900 | -0.78400000 |
| C | -2.76507200 | -1.23292400 | 0.43034700  |
| C | -3.98220900 | -1.91453900 | 0.32086400  |
| C | -4.47859200 | -2.74415200 | 1.33155800  |
| C | -3.74685200 | -2.90633600 | 2.51173100  |
| C | -2.54303100 | -2.23023400 | 2.65516700  |
| C | -2.03862700 | -1.40062100 | 1.63974000  |
| O | -4.20387400 | -3.71219800 | 3.50756100  |
| O | -5.65530900 | -3.41229200 | 1.21374800  |
| O | -6.11281000 | 0.43844000  | -2.48887700 |
| O | -4.94628500 | -1.87580700 | -3.04550200 |
| O | -4.81565200 | -1.84640700 | -0.77019100 |
| O | -2.28565900 | -2.33334500 | -2.12910500 |
| O | -2.63601100 | -0.31412500 | -3.22520300 |
| H | -1.33274700 | -0.23679700 | -0.85265900 |
| H | 0.74493800  | 3.11007300  | -1.53456800 |
| H | -0.66649600 | 3.93673200  | 0.65463100  |
| H | -0.69851800 | 2.00088400  | 2.24347400  |
| H | 1.49584500  | 0.50562600  | 2.09206500  |
| H | 1.14398700  | 0.67536400  | -0.88570700 |
| H | 1.88390900  | 4.82445300  | 0.73326000  |
| H | 2.55490000  | 4.73102000  | -0.91459400 |
| H | 4.65575000  | -0.79255500 | 1.41880200  |
| H | 5.02752600  | -1.31084500 | -2.85196300 |
| H | 7.63006200  | -2.65757900 | 1.95878700  |
| H | 8.55748500  | -3.43506700 | -0.94465200 |
| H | 6.96457800  | -2.58494400 | -3.50226200 |

|   |             |             |             |
|---|-------------|-------------|-------------|
| H | -4.81282800 | 2.19814000  | -0.97008100 |
| H | -1.97982300 | -2.33913700 | 3.57329200  |
| H | -5.05063700 | -4.09443100 | 3.22808800  |
| H | -6.03820900 | -3.21570400 | 0.34323800  |
| H | -5.78255600 | -1.42876800 | -3.28215300 |
| H | -2.65223500 | -2.78735200 | -2.90493600 |
| H | -1.67579600 | -0.20531000 | -3.30106600 |
| C | 1.04562300  | 6.91684000  | -0.61650900 |
| H | 1.23935000  | 7.16016100  | 0.43791300  |
| H | 0.22531100  | 7.53813900  | -0.98153700 |
| H | 1.95139400  | 7.14095300  | -1.19789700 |
| C | 1.02595100  | 2.77265600  | 3.83952100  |
| H | 0.04051500  | 3.04760700  | 4.23762000  |
| H | 1.79062400  | 3.39798400  | 4.30268900  |
| H | 1.22283000  | 1.72167400  | 4.08289800  |

Cartesian coordinates of the lowest-energy conformer of 3,6-dimethoxyfurosin [**fro-B** ( $^1C_4$ )] at the B3LYP/6-31G(d,p) level in acetone (PCM).

|   |             |             |             |
|---|-------------|-------------|-------------|
| C | -1.19406300 | -2.44228300 | -0.32919800 |
| C | -0.34969300 | -2.07687500 | 0.89091900  |
| C | -0.74931500 | -0.73160000 | 1.52582900  |
| C | -0.83693400 | 0.37056000  | 0.44717300  |
| C | -1.54449800 | -0.08105800 | -0.83966500 |
| O | -1.22336200 | -1.35916200 | -1.27959000 |
| O | 0.98854300  | -1.93424000 | 0.35163700  |
| O | 0.51055400  | 0.74651400  | 0.06844100  |
| C | -2.59453200 | -2.97204700 | -0.00227000 |
| O | -1.98953700 | -0.91718400 | 2.17899600  |
| O | -2.98004100 | -0.02430600 | -0.63594500 |
| C | -3.57789400 | 1.18073700  | -0.83427600 |
| O | -2.94036200 | 2.19552400  | -1.06618900 |
| C | -5.05373200 | 1.11367700  | -0.73359600 |
| C | -5.76392900 | 2.31804000  | -0.83491200 |
| C | -7.15282800 | 2.30995100  | -0.75322100 |
| C | -7.83206400 | 1.09682400  | -0.57472500 |
| C | -7.11732700 | -0.10503700 | -0.47735600 |
| C | -5.72883800 | -0.10498800 | -0.55332100 |
| O | -7.84998400 | 3.47693700  | -0.84776900 |
| O | -9.19217000 | 1.14066600  | -0.50373600 |
| O | -7.89832000 | -1.21632700 | -0.30926400 |
| O | -2.40750600 | -4.20057700 | 0.68143800  |
| C | 2.05201100  | -1.89433600 | 1.16757300  |
| O | 2.04716900  | -2.18127700 | 2.34663400  |
| C | 1.08984700  | 1.72715100  | 0.80989800  |
| O | 0.45242700  | 2.39499800  | 1.60521800  |
| C | 3.25883600  | -1.46019700 | 0.38273800  |
| C | 4.43977100  | -2.05824800 | 0.63919700  |
| C | 5.59688400  | -1.81398500 | -0.22373500 |
| C | 5.46176200  | -0.69720100 | -1.28631500 |
| C | 4.03770800  | -0.63405100 | -1.85473800 |
| C | 3.08746700  | -0.37072600 | -0.67456500 |
| C | 3.43465300  | 0.98294300  | -0.04837600 |
| C | 4.79467400  | 1.31979300  | -0.06688700 |
| C | 5.28800500  | 2.51081000  | 0.47413000  |
| C | 4.40519000  | 3.41185800  | 1.07616300  |
| C | 3.05572700  | 3.09424900  | 1.13155000  |
| C | 2.55395600  | 1.90200600  | 0.58134200  |
| O | 4.85771700  | 4.58028800  | 1.60488700  |
| O | 6.60588600  | 2.83797100  | 0.43829400  |
| O | 6.64918600  | -2.43681000 | -0.16867700 |
| O | 6.37197900  | -0.89244900 | -2.29868000 |
| O | 5.78784100  | 0.53542000  | -0.61074200 |
| O | 3.90049200  | 0.41702500  | -2.77014500 |
| O | 3.71501400  | -1.88344000 | -2.41116100 |
| H | 2.06857700  | -0.37775200 | -1.05066700 |
| H | -0.66495400 | -3.23892500 | -0.85920100 |
| H | -0.38064900 | -2.87305000 | 1.63606800  |
| H | 0.02302100  | -0.44444100 | 2.25050800  |
| H | -1.34546400 | 1.24935400  | 0.84025800  |
| H | -1.28426300 | 0.60324300  | -1.64829100 |
| H | -3.15982700 | -2.26290900 | 0.61087900  |
| H | -3.13249700 | -3.12282000 | -0.95059000 |
| H | -5.23575000 | 3.25307400  | -0.97561300 |
| H | -5.17748500 | -1.03474700 | -0.48045100 |
| H | -8.79512900 | 3.27216500  | -0.77124200 |
| H | -9.52578700 | 0.23705600  | -0.38674300 |
| H | -7.35158600 | -2.01297000 | -0.26965600 |

|   |             |             |             |
|---|-------------|-------------|-------------|
| H | 4.53759000  | -2.81137400 | 1.41381000  |
| H | 2.37135100  | 3.77926300  | 1.61516700  |
| H | 5.81797800  | 4.62376300  | 1.47355200  |
| H | 7.09074300  | 2.12846800  | -0.01370900 |
| H | 7.07990400  | -1.45591600 | -1.92746400 |
| H | 4.63640700  | 0.36763900  | -3.40033300 |
| H | 4.43286300  | -2.12554300 | -3.01830000 |
| C | -3.63187200 | -4.78732800 | 1.09220300  |
| H | -4.27971400 | -5.01222400 | 0.23249100  |
| H | -4.18299400 | -4.13152900 | 1.78143500  |
| H | -3.38768500 | -5.71945100 | 1.60607000  |
| C | -2.19635100 | -0.04776900 | 3.29228800  |
| H | -2.15175300 | 1.00905100  | 3.00307300  |
| H | -1.45112600 | -0.23194700 | 4.07668300  |
| H | -3.19170100 | -0.26926700 | 3.68000400  |
